# Supplementary material for: Deciphering deterioration mechanisms of complex diseases based on the construction of dynamic networks and systems analysis
Source: PubMed Central journal article supplement (PMC4365388; doi:10.1038/srep09283), 2015-03-19
Supplement: srep09283-s1.pdf [file srep09283-s1.pdf]

# Supplementary Materials:

## **Deciphering deterioration mechanisms of complex diseases based on the construction of dynamic networks and systems analysis**

Yuanyuan Li<sup>1</sup>, Suoqin Jin<sup>1</sup>, Lei Lei<sup>2</sup>, Zishu Pan<sup>2</sup>, Xiufen Zou<sup>1</sup>

<sup>1</sup>School of Mathematics and Statistics, Wuhan University, Wuhan 430072, China.

<sup>2</sup>State Key Laboratory of Virology, College of Life Sciences, Wuhan University, Wuhan 430072, China

---

### **Table of Contents**

|                                                          |    |
|----------------------------------------------------------|----|
| <b>Supplementary Text</b> .....                          | 2  |
| Calculation of average absolute and relative errors..... | 2  |
| Cross-validation.....                                    | 2  |
| <b>Supplementary Figures</b> .....                       | 4  |
| Figure S1, Figure S2.....                                | 4  |
| Figure S3, Figure S4.....                                | 5  |
| Figure S5, Figure S6.....                                | 6  |
| Figure S7, Figure S8.....                                | 7  |
| Figure S9.....                                           | 8  |
| Figure S10.....                                          | 9  |
| Figure S11.....                                          | 10 |
| Figure S12.....                                          | 11 |
| Figure S13.....                                          | 12 |
| Figure S14, Figure S15.....                              | 13 |
| Figure S16.....                                          | 14 |
| Figure S17.....                                          | 15 |
| Figure S18.....                                          | 16 |
| Figure S19.....                                          | 17 |
| Figure S20.....                                          | 18 |
| Figure S21.....                                          | 19 |
| Figure S22.....                                          | 20 |
| Figure S23.....                                          | 21 |
| Figure S24, Figure S25.....                              | 22 |
| Figure S26, Figure S27.....                              | 23 |
| <b>Supplementary Tables</b> .....                        | 24 |
| Table S1.....                                            | 24 |
| Table S2.....                                            | 31 |
| Table S3.....                                            | 34 |
| Tables S4-S5.....                                        | 37 |
| Tables S6-S8.....                                        | 38 |
| Tables S9-S12.....                                       | 39 |
| Tables S13-S15.....                                      | 40 |

|                                               |           |
|-----------------------------------------------|-----------|
| Tables S16-S19.....                           | 41        |
| Table S20.....                                | 42        |
| Table S21.....                                | 43        |
| Table S22.....                                | 44        |
| Tables S23.....                               | 45        |
| TableS24-S25.....                             | 46        |
| Table S26.....                                | 47        |
| Table S27.....                                | 48        |
| Table S28.....                                | 49        |
| Table S29.....                                | 50        |
| Table S30.....                                | 51        |
| Table S31.....                                | 52        |
| <b>Supplementary MATLAB source codes.....</b> | <b>53</b> |

---

## Supplementary Text:

### 1. Calculation of average absolute and relative errors

In the present study, we defined two types of errors: average absolute error (AAE) and average relative error (ARE), measuring how close predictions were to the experimental data, namely the accuracy of the constructed dynamic networks. Because the absolute error relates to the dimension, it is generally a reference value. The relative error is not related to the dimension, therefore, it can reflect the difference between simulations and experimental data. In scientific computing, the relative error between the simulations and real data is an important index to prove the effectiveness of the method. The absolute error is the magnitude of the difference between the experimental value and the simulation value, and the relative error is the absolute error divided by the magnitude of the experimental value. Accordingly, AAE and ARE can be defined as follows:

$$AAE = \frac{1}{n} \sum_{i=1}^n \frac{1}{m} \sum_{j=1}^m |X_{ij}^{\text{exp}}(t_r + \Delta t) - X_{ij}^{\text{sim}}(t_r + \Delta t)|. \quad (1)$$

$$ARE = \frac{1}{n} \sum_{i=1}^n \frac{1}{m} \sum_{j=1}^m \frac{|X_{ij}^{\text{exp}}(t_r + \Delta t) - X_{ij}^{\text{sim}}(t_r + \Delta t)|}{|X_{ij}^{\text{exp}}(t_r + \Delta t)|}. \quad (2)$$

In the equations (1) and (2),  $X_{ij}^{\text{sim}}(t_r + \Delta t)$  and  $X_{ij}^{\text{exp}}(t_r + \Delta t)$  are the simulation value and experimental value of the  $i$ -th protein at time point  $t_r + \Delta t$  in the  $j$ -th sample, respectively.  $X_{ij}^{\text{sim}}(t_r + \Delta t)$  is calculated according to the following formula:

$$X_{ij}^{\text{sim}}(t_r + \Delta t) = X_{ij}^{\text{exp}}(t_r - \Delta t) + 2 \cdot \Delta t \cdot \sum_{k=1}^n (a_{ik}(t_r) \cdot X_{kj}^{\text{exp}}(t_r)), \quad (3)$$

where  $n$  is the number of proteins at time point  $t_r$ ,  $m$  is the number of samples and  $a_{ik}(t_r)$  is the optimal solution of the optimization problem (6) in the main text, which denotes the interaction ability of the  $k$ -th protein to  $i$ -th protein at time point  $t_r$ .  $\Delta t$  stands for the time increment.

Moreover, the average values of AAEs and AREs were computed as follows. First, according to the definitions of the AAE and ARE, i.e. the equations (1) and (2), we calculated the AAE and ARE of the temporary network at each time point. Second, the AAEs and AREs were averaged across all the time points, which gave the errors for the constructed dynamic networks in the control condition and case condition, respectively.

## 2. Cross-validation

For each dataset, leaving one sample  $S_i, i = 1, 2, \dots, N$  out, we used the remaining  $N - 1$  samples for repeating the process of the construction of dynamic networks, where  $N$  represents the number of the subjects. Based on the reconstructed dynamic networks, we carried out the validation for the excluded sample  $S_i$ . Five measures were used to evaluate the results, including Sensitivity (SN), Specificity (SP), False positive rate (FPR), Accuracy (ACC) and Matthews coefficient constant (MCC). Mathematically, they are defined as follows<sup>1,2</sup>:

$$SN = TP / (TP + FN) \quad (4)$$

$$SP = TN / (TN + FP) \quad (5)$$

$$FPR = FP / (FP + TN) \quad (6)$$

$$ACC = (TP + TN) / (TP + FP + TN + FN) \quad (7)$$

$$MCC = \frac{TP \cdot TN - FP \cdot FN}{\sqrt{(TP + FP)(TP + FN)(TN + FP)(TN + FN)}} \quad (8)$$

where TP (true positive) is the number of edges of the reconstructed dynamic network matched by the edges of the original dynamic network, FP (false positive) equals the total number of edges of the reconstructed dynamic network minus TP, TN (true negative) is the number of edges not in both the reconstructed dynamic network and the original dynamic network, and FN (false negative) is the number of edges of the original dynamic network that are not matched by the reconstructed dynamic network.

1. Fawcett, T. An Introduction to ROC Analysis. *Pattern Recogn Lett* **27**, 861–874 (2006).
2. Zhang, X. *et al.* NARROMI: a noise and redundancy reduction technique improves accuracy of gene regulatory network inference. *Bioinformatics* **29**, 106-113 (2013).

## Supplementary Figures:

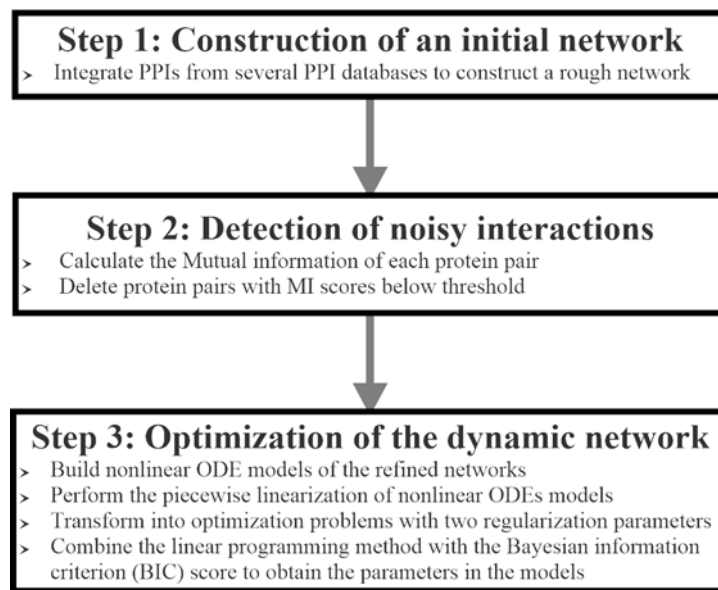

**Figure S1 | The framework of the network construction.**

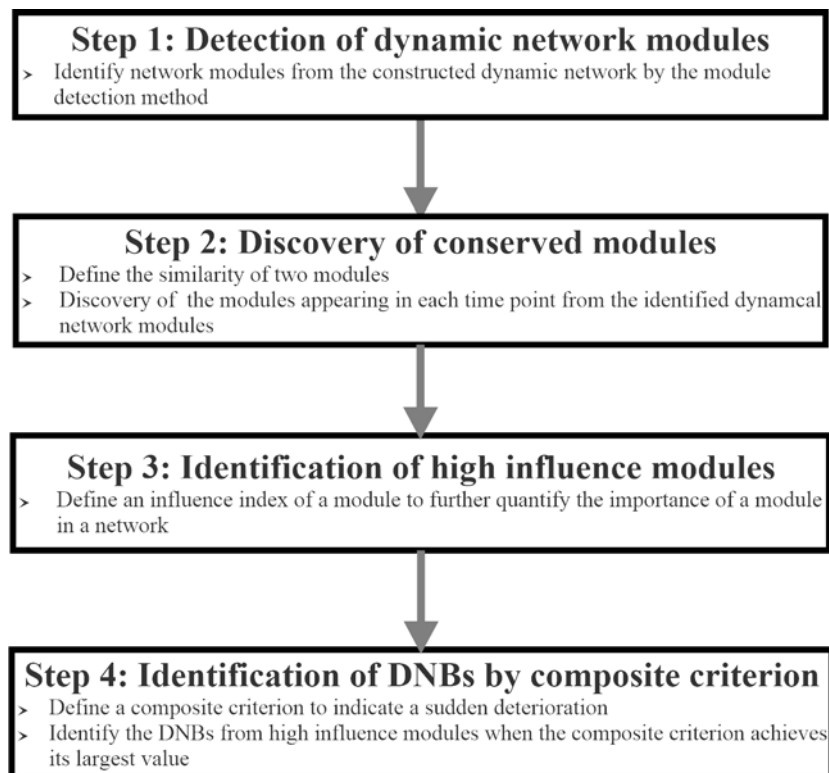

**Figure S2 | The framework of dynamic network biomarker identification.**

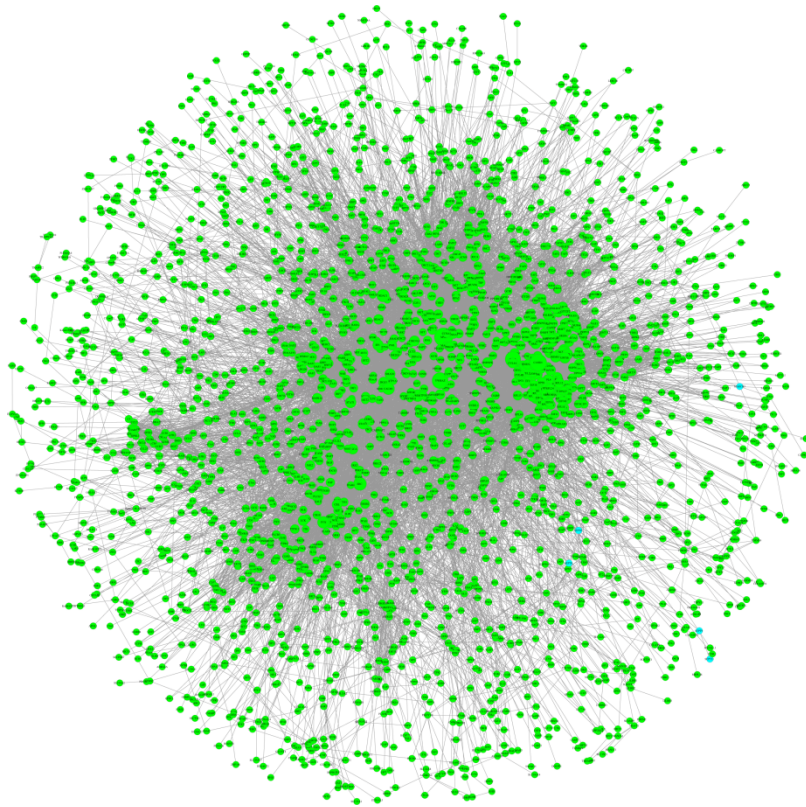

**Figure S3 | An initial PPI network collected from three PPI databases (HPRD, BioGRID and STRING) for the datasets GSE30550 and GSE52428.** We extracted high confidence ( $>0.7$ ) interactions from the STRING database. In this network, there are 2400 nodes and 16498 edges. The node sizes are proportional to the degree of the nodes.

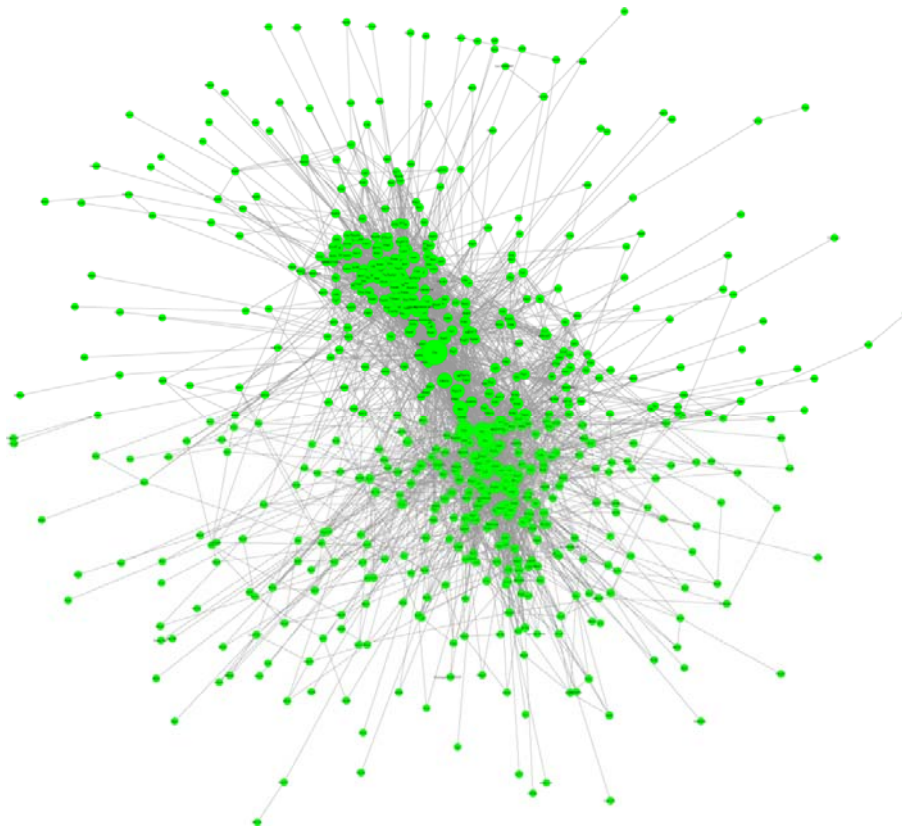

**Figure S4 | An initial PPI network collected from three PPI databases (HPRD, BioGRID and STRING) for the dataset GSE2565.** We extracted high confidence ( $>0.7$ ) interactions from the STRING database. In this network, there are 770 nodes and 5890 edges. The node sizes are proportional to the degree of the nodes.

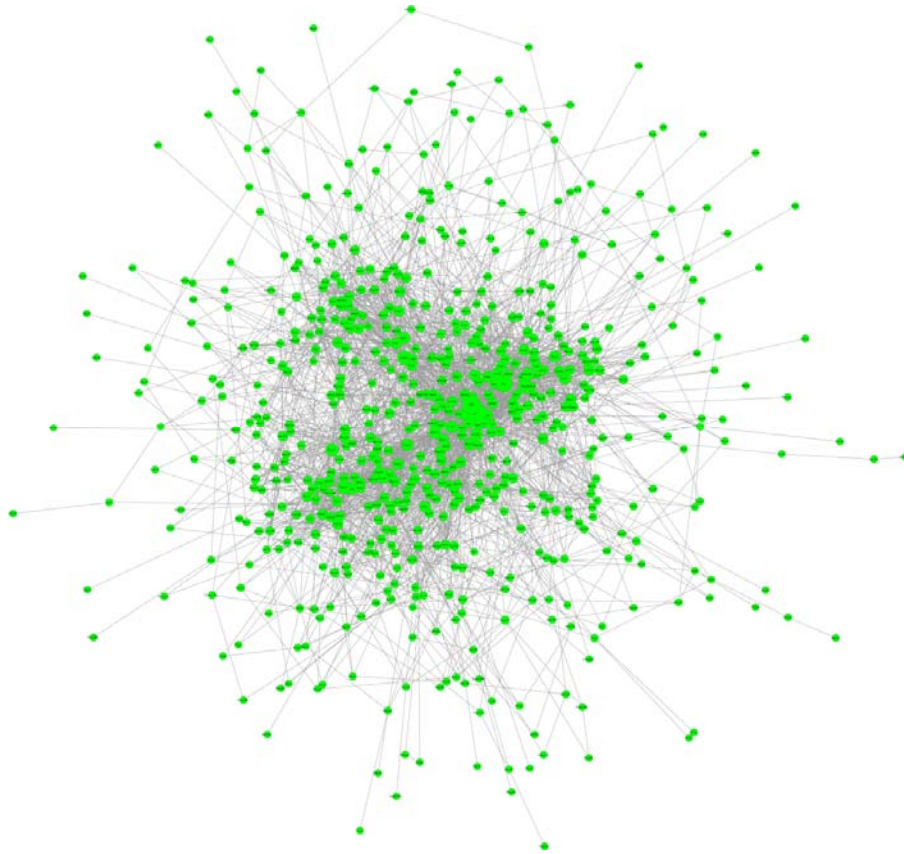

**Figure S5 | An initial PPI network collected from three PPI databases (HPRD, BioGRID and STRING) for the dataset GSE13268.** We extracted high confidence ( $>0.7$ ) interactions from the STRING database. In this network, there are 755 nodes and 4054 edges. The node sizes are proportional to the degree of the nodes.

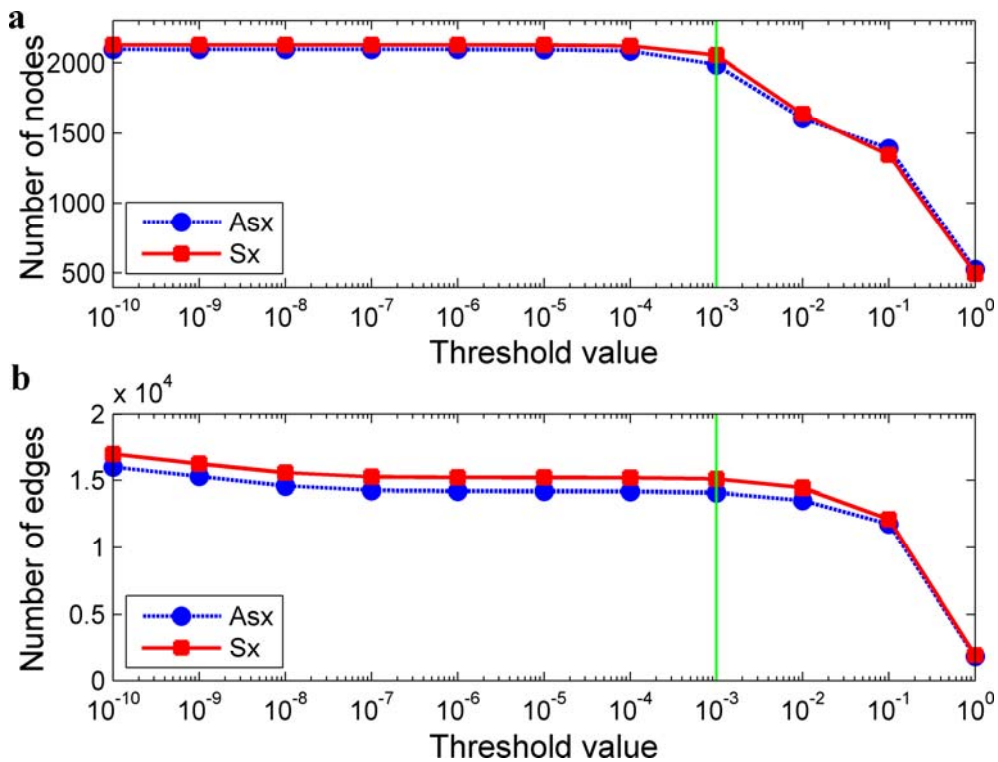

**Figure S6 | The number of nodes and edges for various thresholds for the dataset GSE30550.** Blue dashed line with circle markers and red solid line with square markers represent the number of nodes (a) and edges (b) in the asymptomatic (Asx) and symptomatic (Sx) networks, respectively. The green line indicates the threshold we chose in our study.

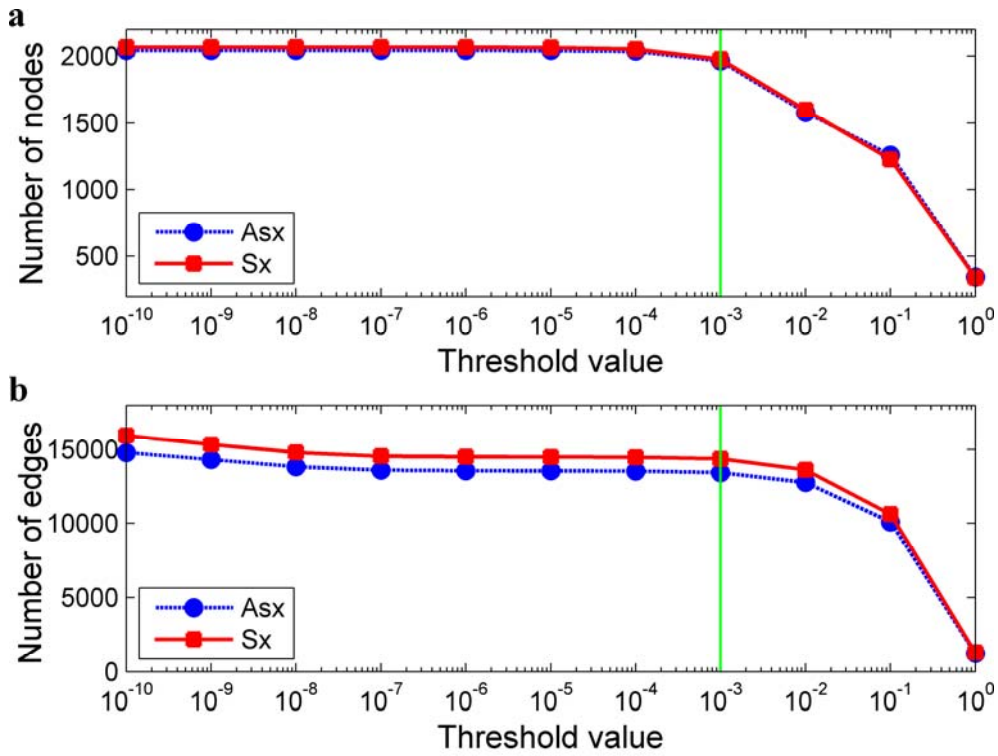

**Figure S7 | The number of nodes and edges for various thresholds for the dataset GSE52428.** Blue dashed line with circle markers and red solid line with square markers represent the number of nodes (a) and edges (b) in the asymptomatic (Asx) and symptomatic (Sx) networks, respectively. The green line indicates the threshold we chose in our study.

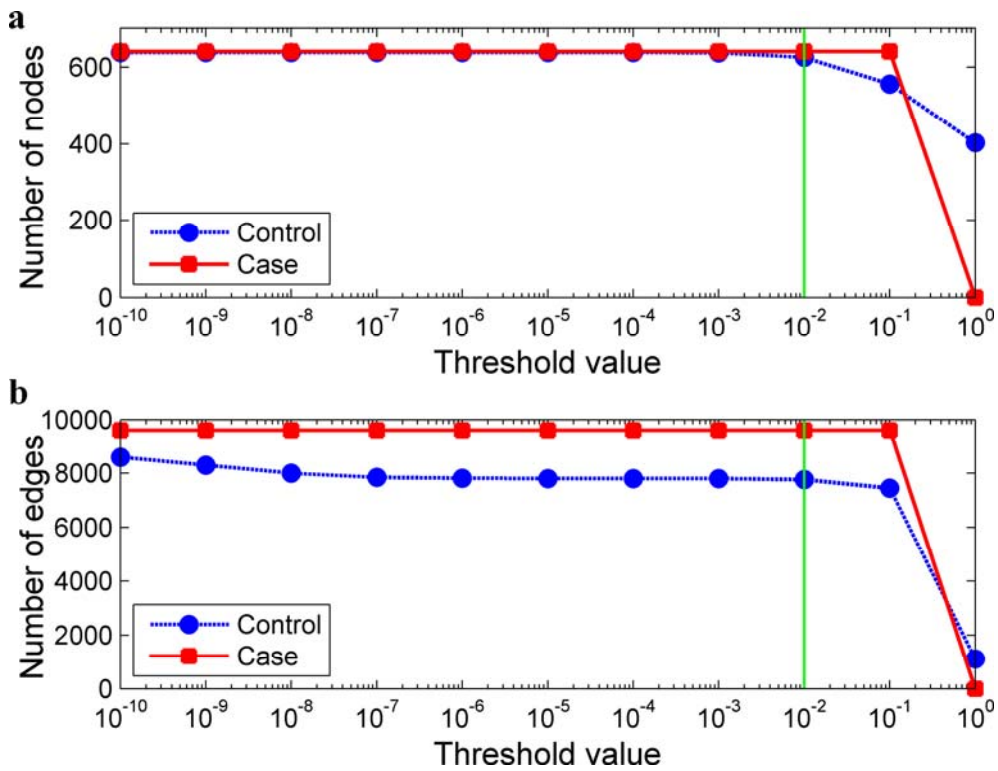

**Figure S8 | The number of nodes and edges for various thresholds for the dataset GSE2565.** Blue dashed line with circle markers and red solid line with square markers represent the number of nodes (a) and edges (b) in the control and case networks, respectively. The green line indicates the threshold we chose in our study.

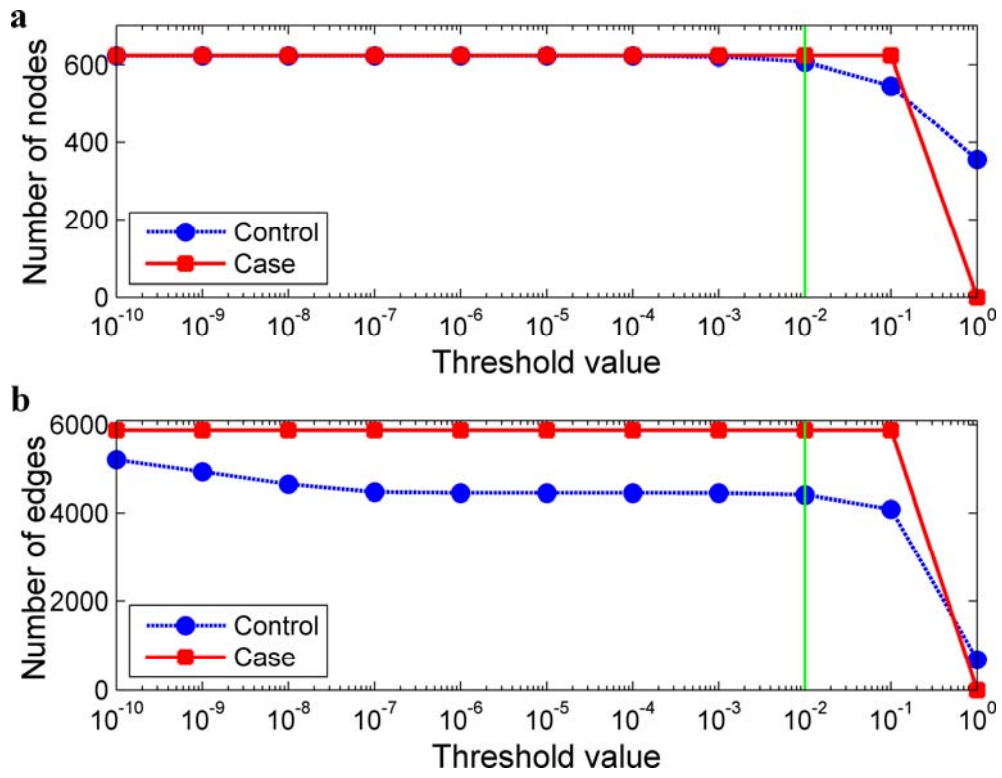

**Figure S9 | The number of nodes and edges for various thresholds for the dataset GSE13268.** Blue dashed line with circle markers and red solid line with square markers represent the number of nodes (a) and edges (b) in the control and case networks, respectively. The green line indicates the threshold we chose in our study.



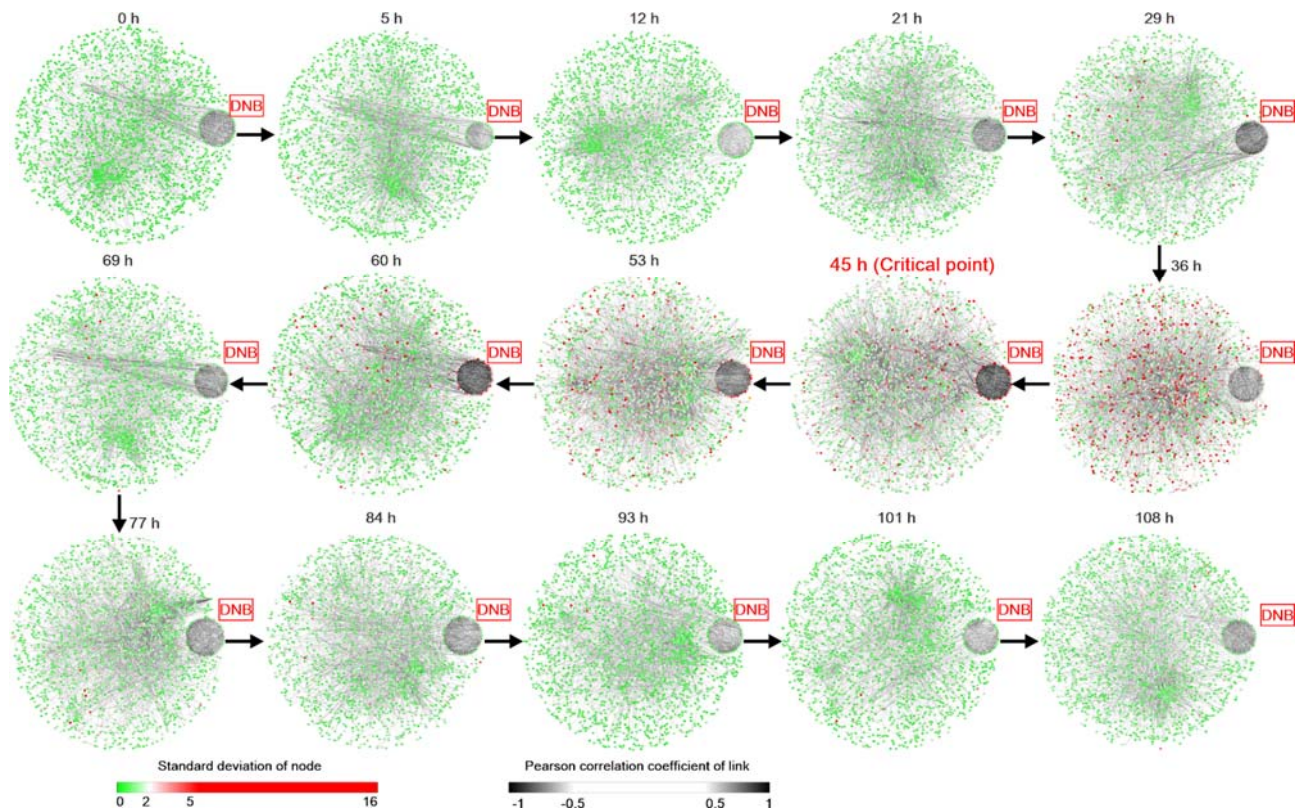

**Figure S10 | Dynamical changes in the constructed symptomatic network for the dataset GSE30550, including the detected DNB during the disease progression for the live H3N2 influenza infection.** The DNBs are highlighted in the small circle. We show the dynamical evolution of the network structure for the constructed molecular interaction network at 16 time points, i.e. 0h, 5h, 12h, 21h, 29h, 36h, 45h, 53h, 60h, 69h, 77h, 84h, 93h, 101h, and 108h. The color of the nodes represents the fluctuation strength of molecular expressions, and each edge represents the correlation between two nodes. It can be seen that at 45 hour, there is a strong signal to indicate the pre-disease state or pre-symptom. From these figures showing the dynamic evolution, it is obvious that the group of DNB not only provides significant signals as the system approaches the critical point, but also forms a strongly correlated observable subnetwork in terms of expression variations and network connections.

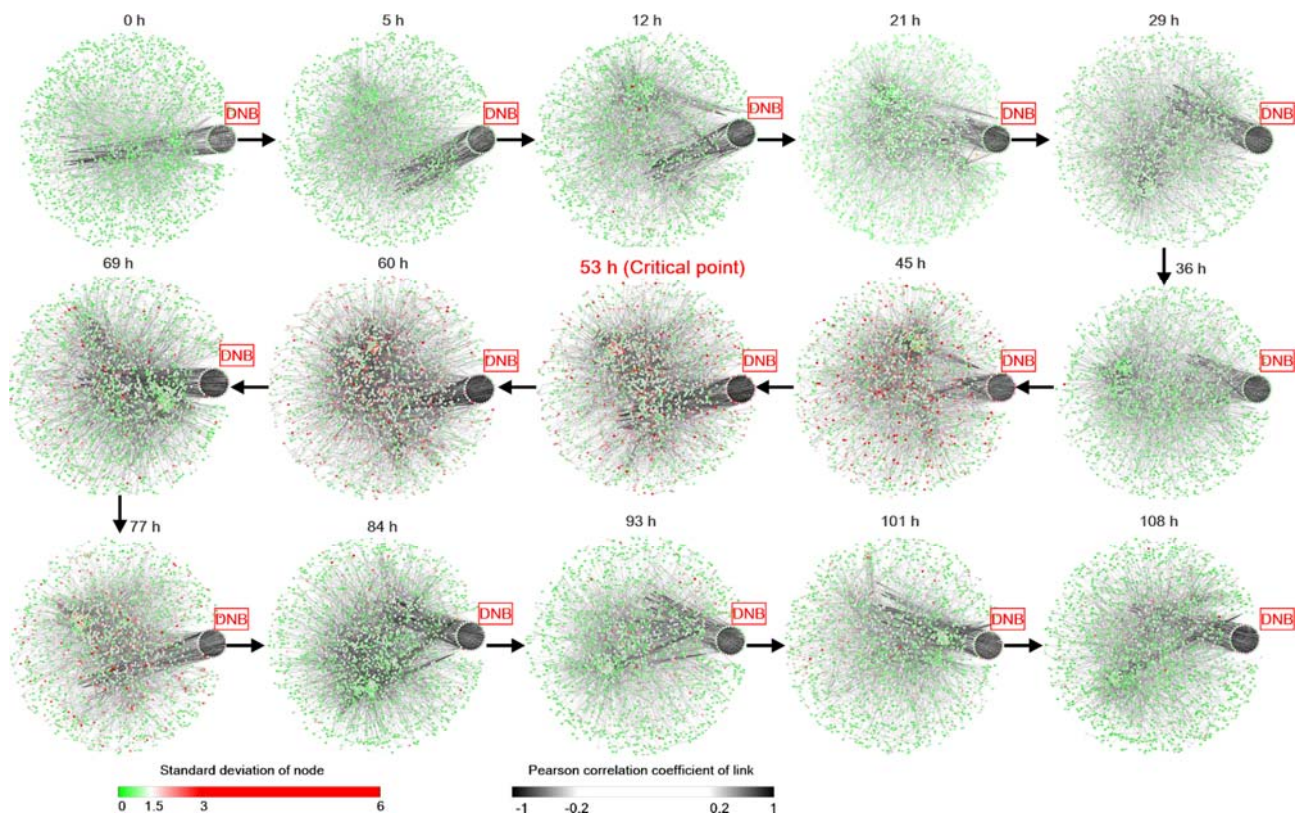

**Figure S11 | Dynamical changes in the constructed symptomatic network for the dataset GSE52428, including the detected DNB during the disease progression for the live H1N1 influenza infection.** The DNBs are highlighted in the small circle. We show the dynamical evolution of the network structure for the constructed molecular interaction network at 16 time points, i.e. 0h, 5h, 12h, 21h, 29h, 36h, 45h, 53h, 60h, 69h, 77h, 84h, 93h, 101h, and 108h. The color of the nodes represents the fluctuation strength of molecular expressions, and each edge represents the correlation between two nodes. It can be seen that at 53 hour, there is a strong signal to indicate the pre-disease state or pre-symptom.

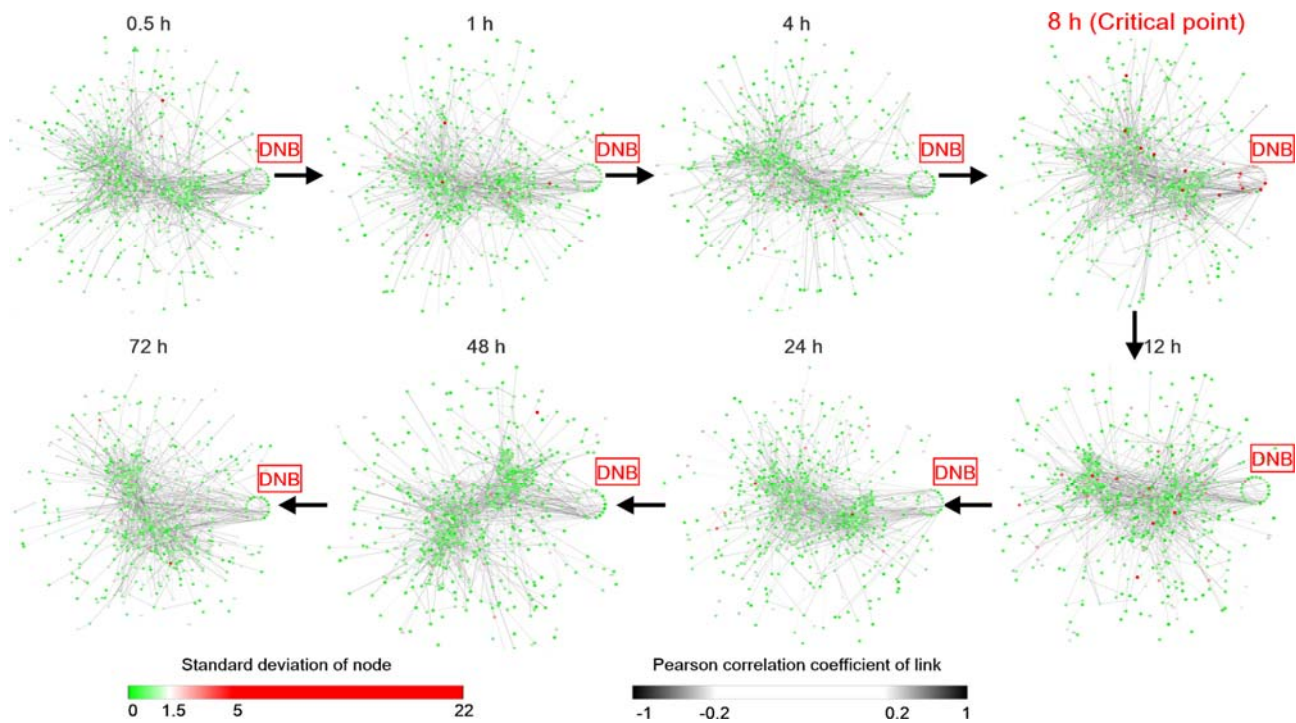

**Figure S12 | Dynamical changes in the constructed case network for the dataset GSE2565, including the detected DNB during the disease progression for the acute lung injury.** The DNBs are highlighted in the small circle. We show the dynamical evolution of the network structure for the constructed molecular interaction network at 8 time points, i.e. 0.5h, 1h, 4h, 8h, 12h, 24h, 48h, and 72h. The color of the nodes represents the fluctuation strength of molecular expressions, and each edge represents the correlation between two nodes. It can be seen that at 8 hour, there is a strong signal to indicate the pre-disease state.

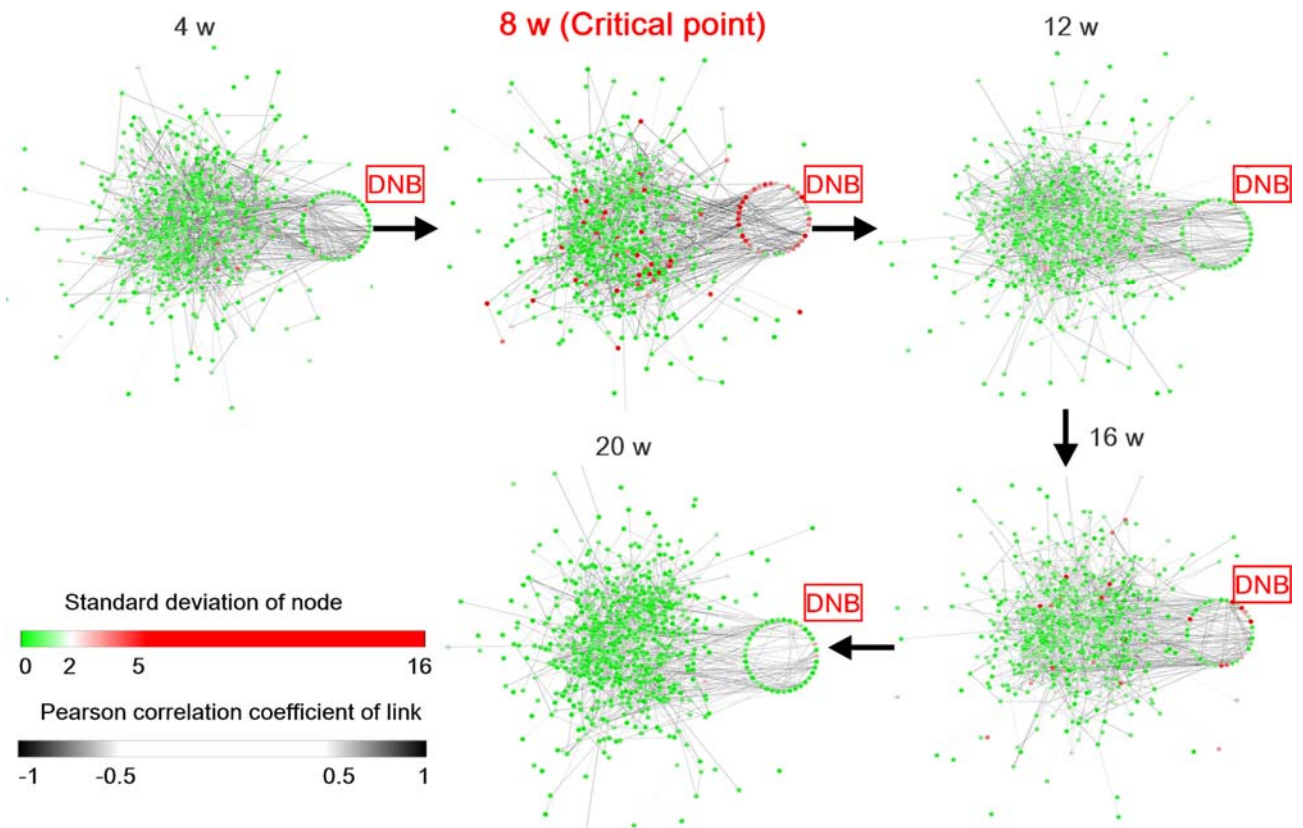

**Figure S13 | Dynamical changes in the constructed case network for the dataset GSE13268, including the detected DNB during the disease progression for the type 2 diabetes mellitus.** The DNBs are highlighted in the small circle. We show the dynamical evolution of the network structure for the constructed molecular interaction network at 5 time period, i.e. 4 week, 8 week, 12 week, 16 week, and 20 week. The color of the nodes represents the fluctuation strength of molecular expressions, and each edge represents the correlation between two nodes. It can be seen that at the 8 week, there is a strong signal to indicate the pre-disease state.

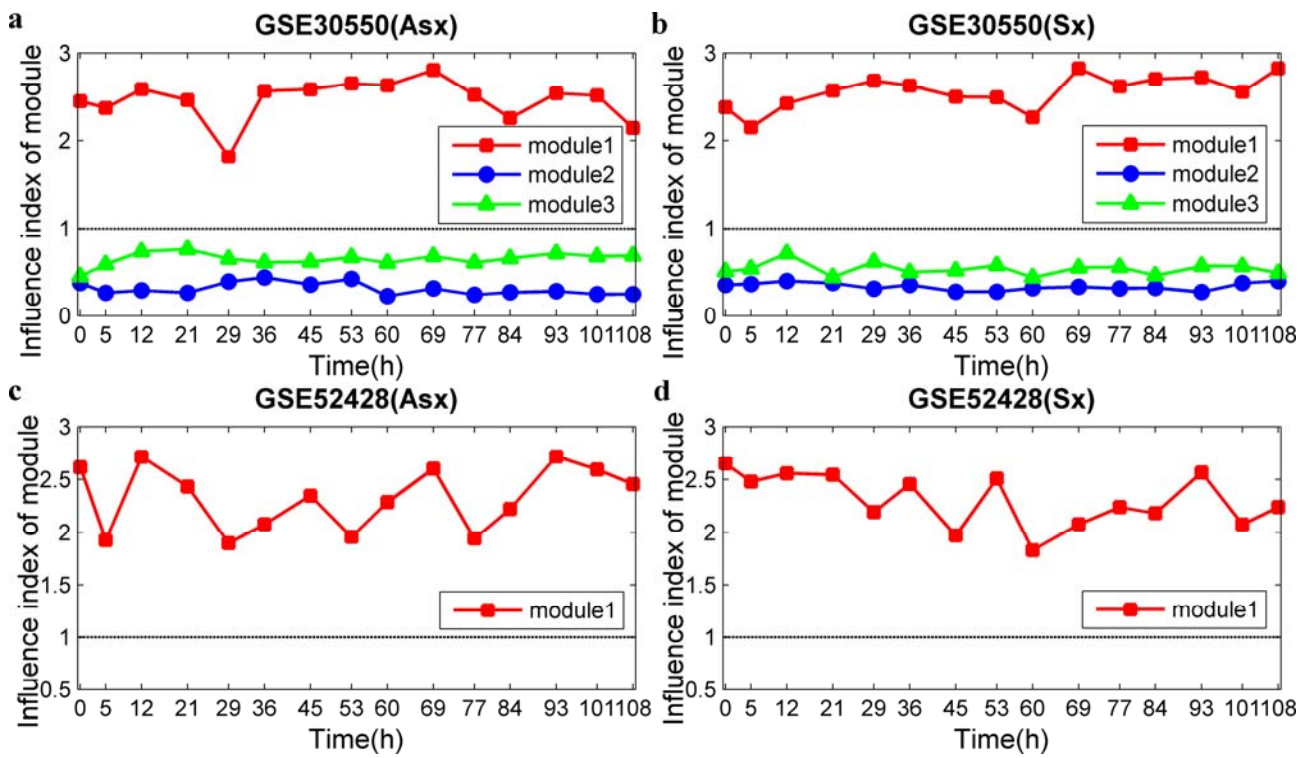

**Figure S14 | Influence index of a module (IIM) of common modules respectively for dataset GSE30550 and GSE52428.** (a) Three modules in the asymptomatic network (Asx) for GSE30550 dataset. (b) Three modules in the symptomatic network (Sx) for GSE30550 dataset. (c) One module in the asymptomatic network (Asx) for GSE52428 dataset. (d) One module in the symptomatic network (Sx) for GSE52428 dataset.

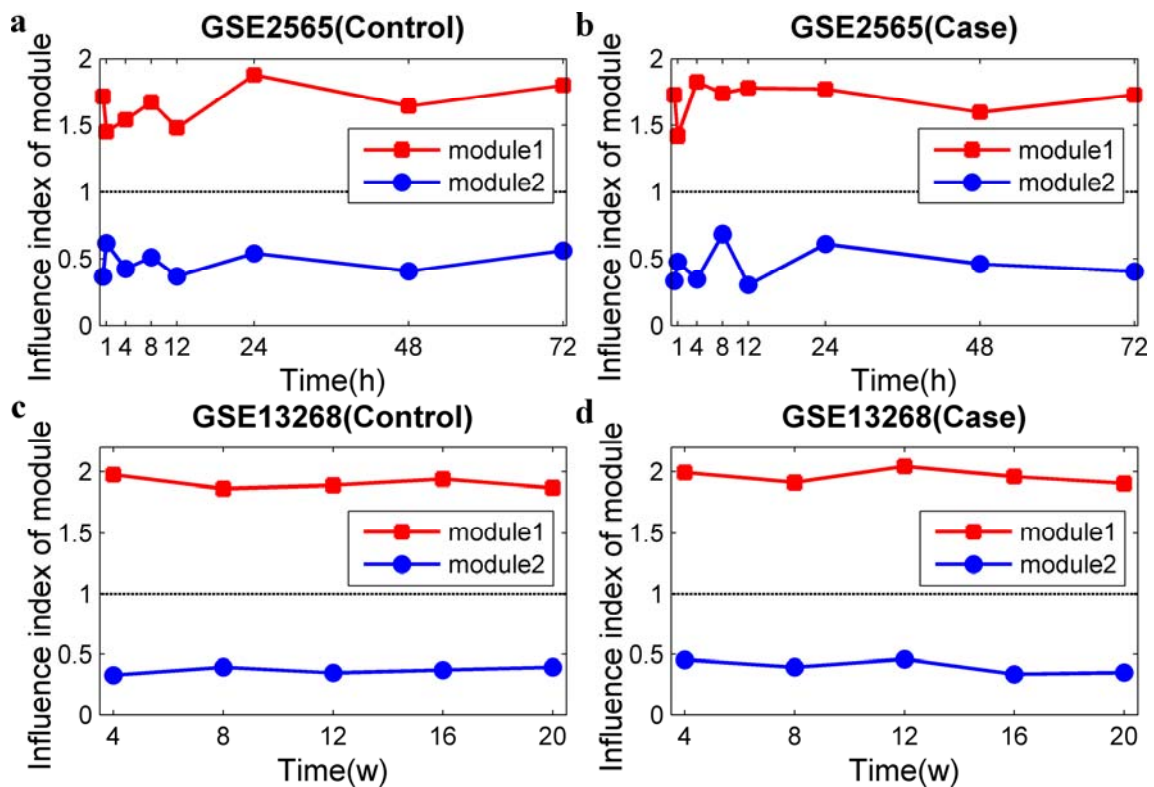

**Figure S15 | Influence index of a module (IIM) of common modules respectively for the datasets GSE2565 and GSE13268.** (a) Two modules in the control network for the GSE2565 dataset. (b) Two modules in the case network for the GSE2565 dataset. (c) Two modules in the control network for the GSE13268 dataset. (d) Two modules in the case network for the GSE13268 dataset.

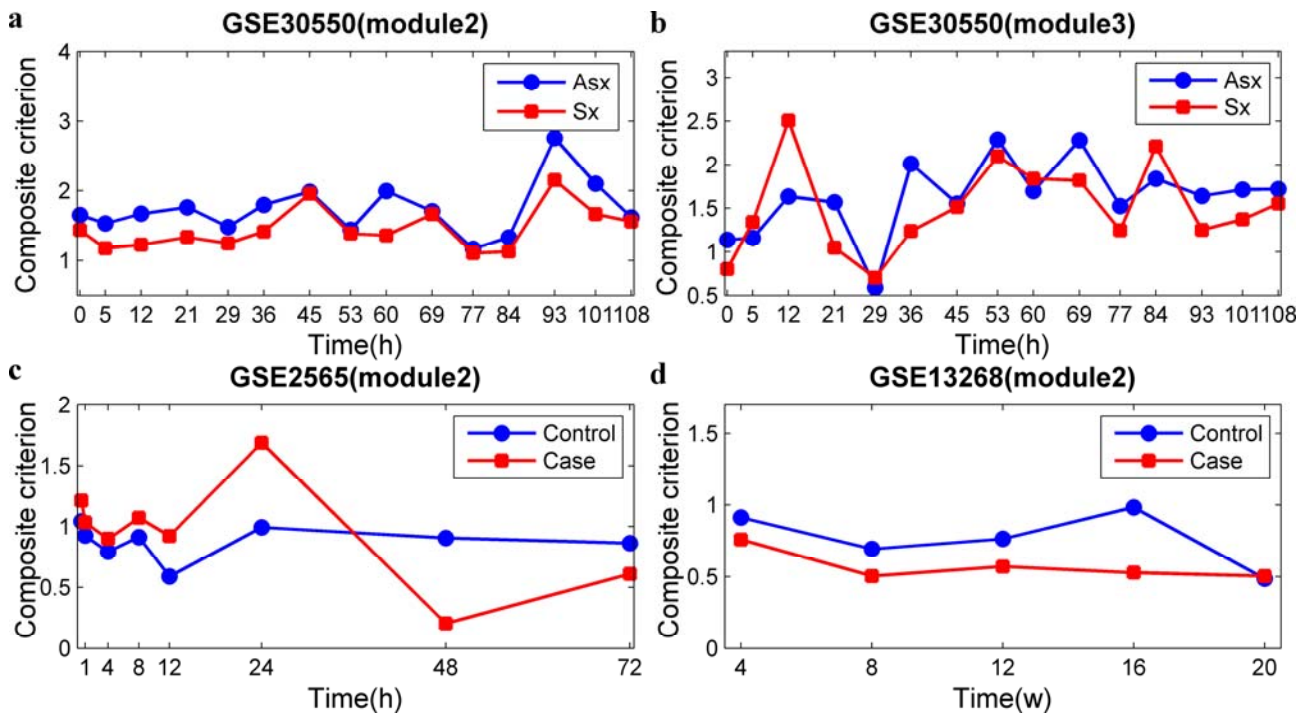

**Figure S16 | Comparisons of composite criteria (CCs) of other common modules between the control (Asx) and case (Sx) networks for the four sets of high-throughput experimental data.** (a) Module 2 in the GSE30550 dataset; (b) Module 3 in the GSE30550 dataset; (c) Module 2 in the GSE2565 dataset; (d) Module 2 in the GSE13268 dataset. Blue line with circle markers and red line with square markers represent composite criterion of the control (asymptomatic (Asx)) and case (symptomatic (Sx)) networks, respectively. There are no strong and significant early-warning signals of these modules before the diseases are eventually deteriorated.



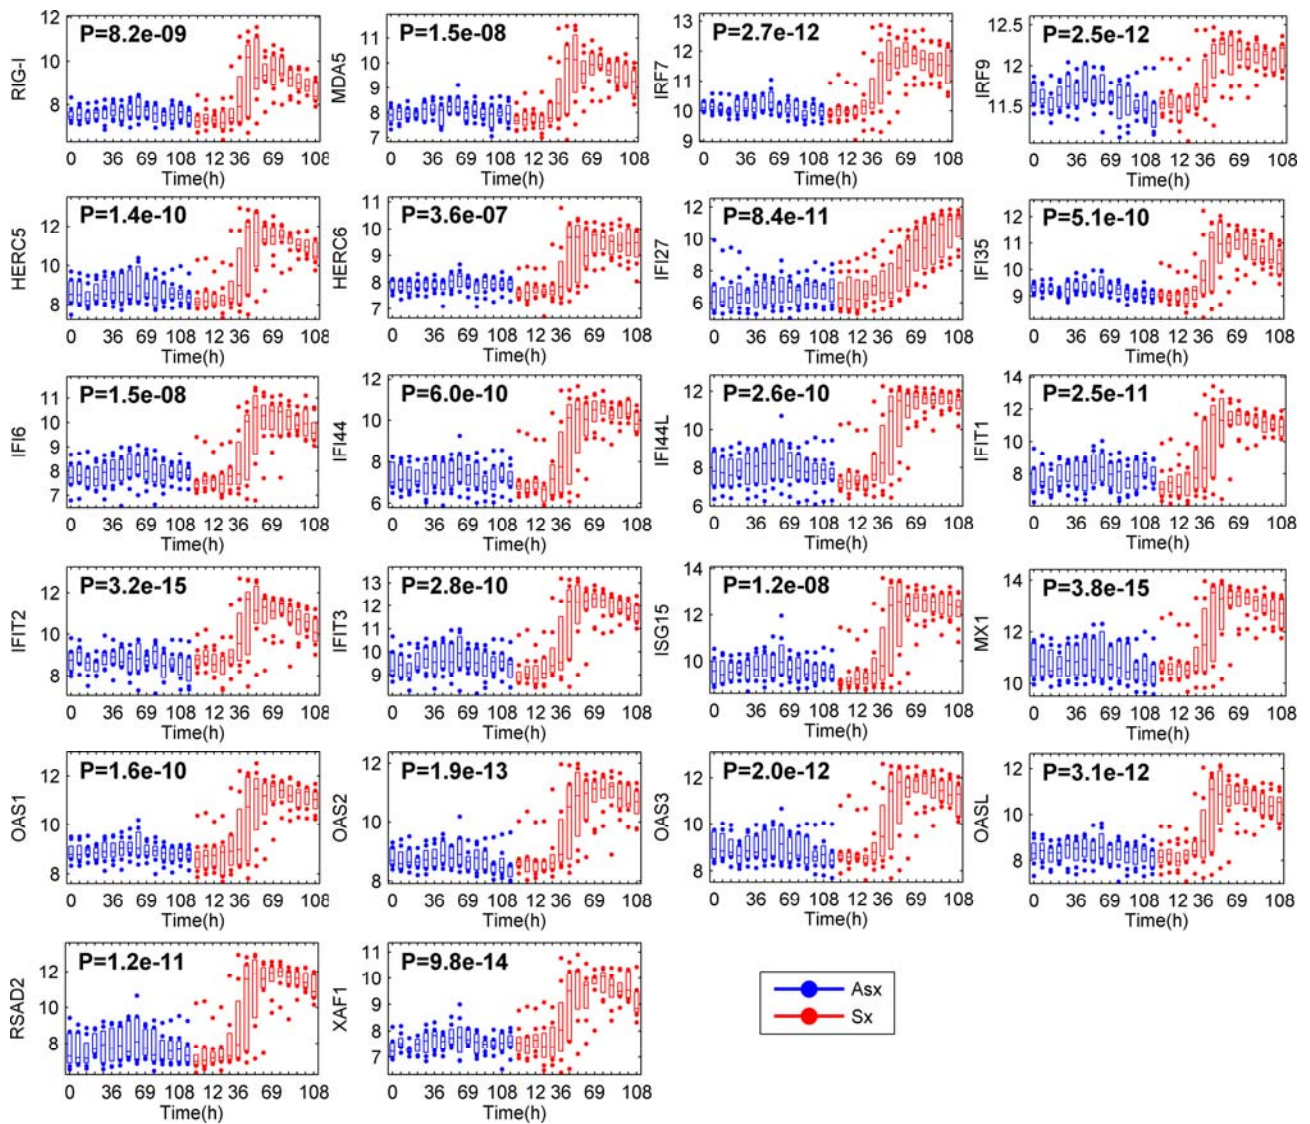

**Figure S18 | Comparison of expression values of the identified DNBs in the symptomatic infection (Sx) with those in the asymptomatic infection (Asx) for the H3N2 strain.** Blue and red lines indicate Asx and Sx, respectively. P-values are from a two-tailed Wilcoxon rank sum test. The results reveal that DNBs exhibit significant higher levels in the symptomatic infections than those in the asymptomatic infections (P-values < 0.0001).



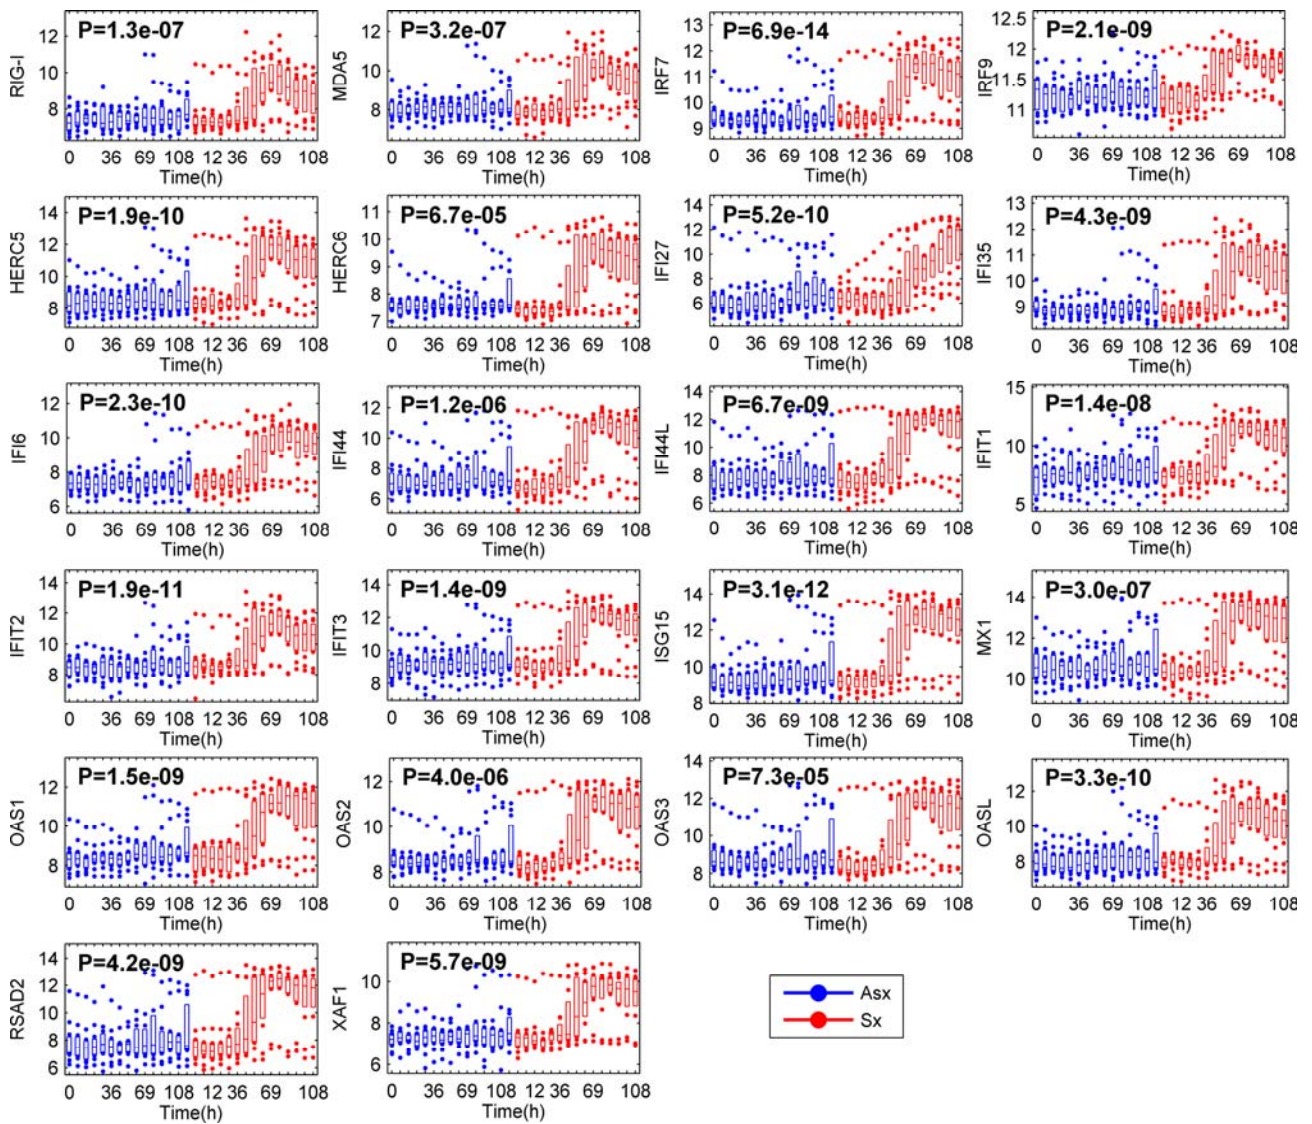

**Figure S19 | Comparison of expression values of the identified DNBs in the symptomatic infection (Sx) with those in the asymptomatic infection (Asx) for the H1N1 strain.** Blue and red lines indicate Asx and Sx, respectively. P-values are from a two-tailed Wilcoxon rank sum test. The results reveal that DNBs exhibit significant higher levels in the symptomatic infections than those in the asymptomatic infections ( $P$ -values  $< 0.0001$ ).

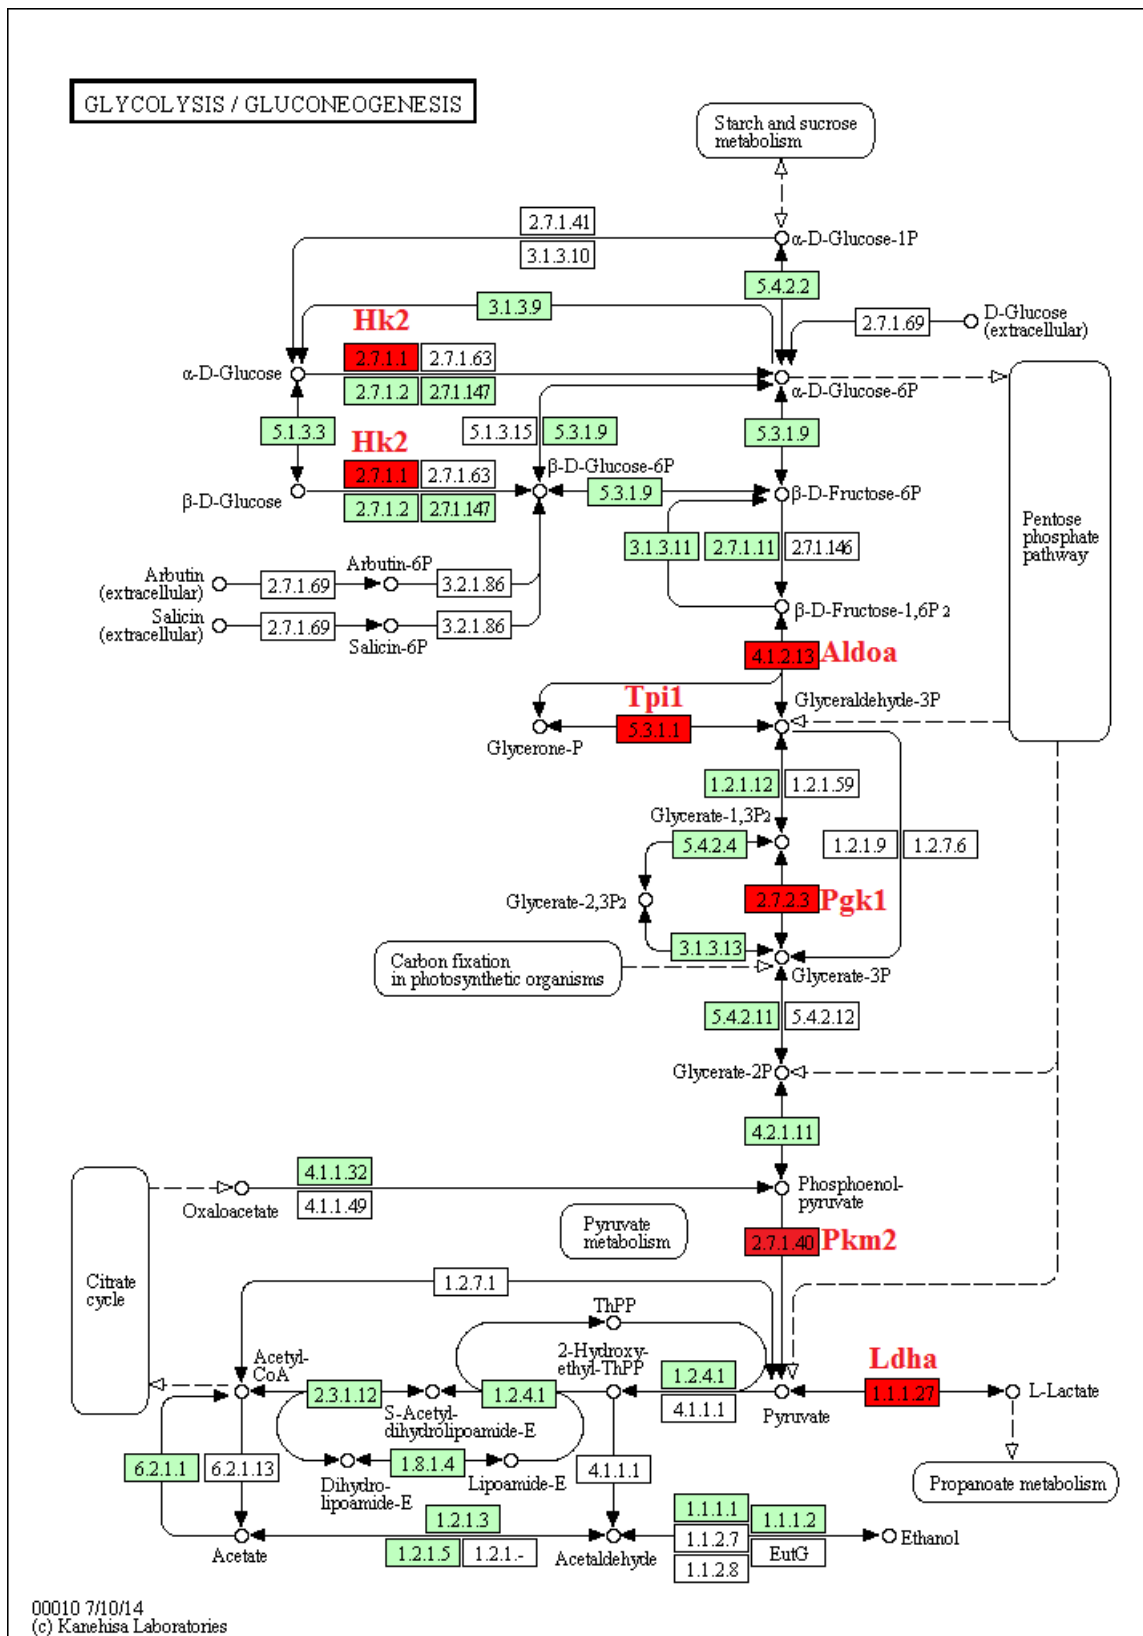

**Figure S20 | Glycolysis / Gluconeogenesis pathway enriched by DNB genes in red color.** The red marked genes in the figure are Hk2, Aldoa, Ldha, Pkg1, Pkm2 and Tpi1.

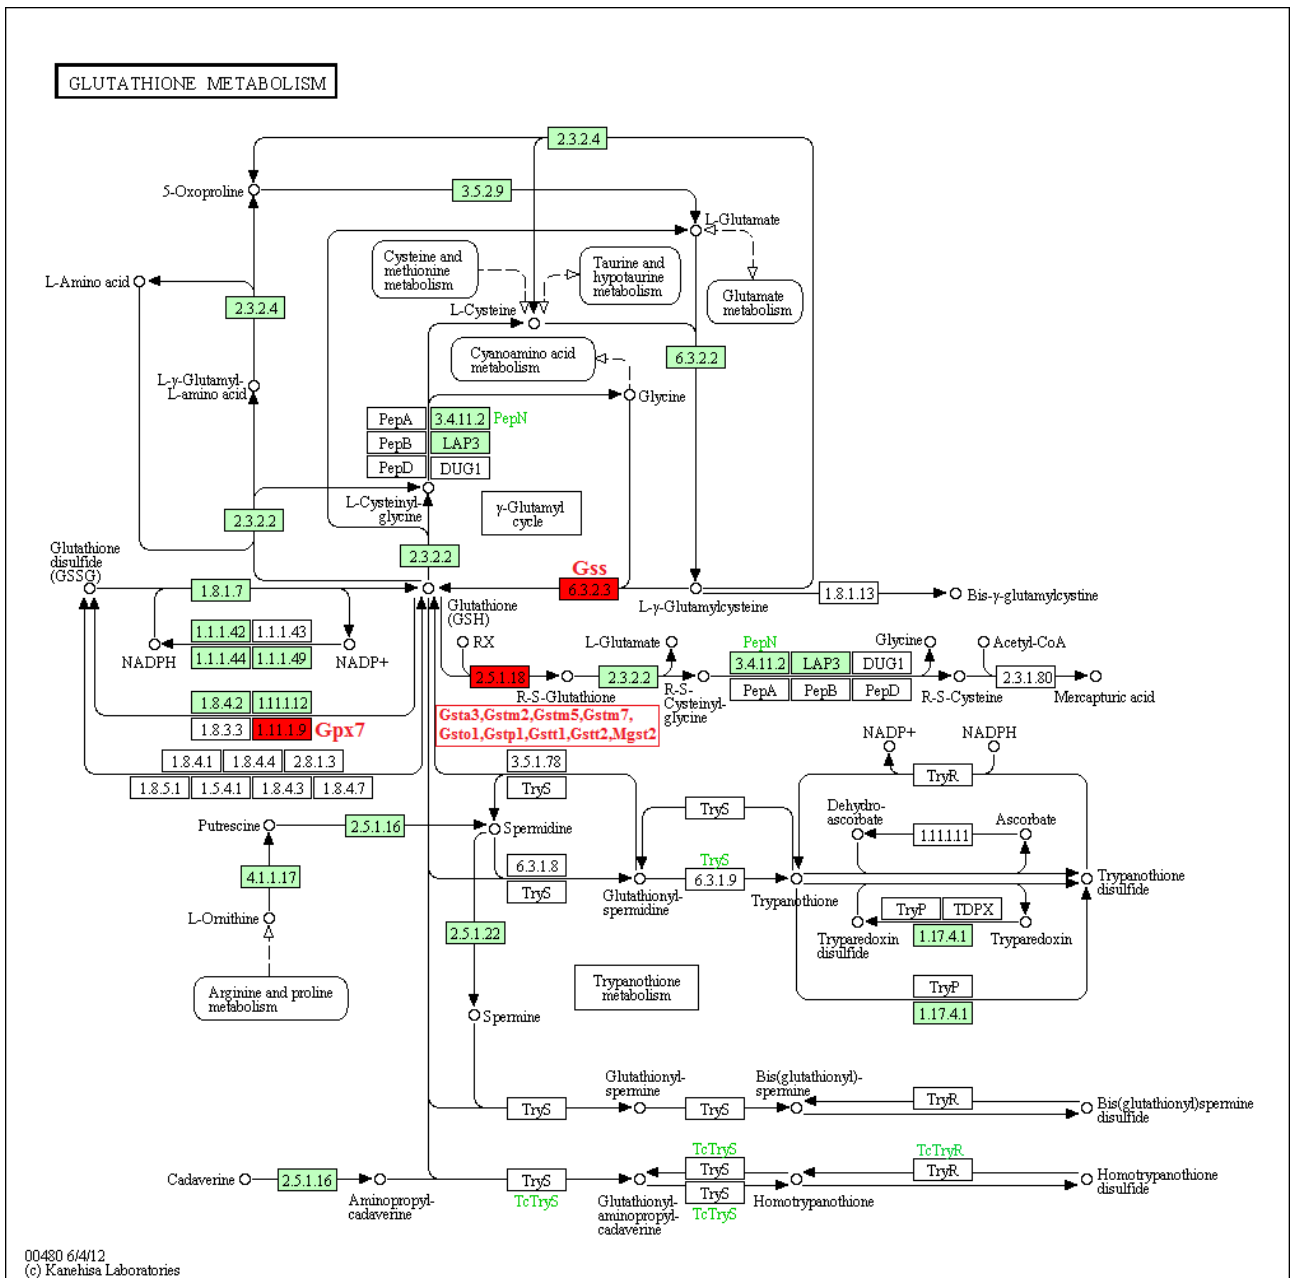

**Figure S21 | Glutathione metabolism pathway enriched by DNB genes in red color.** The red marked genes in the figure are Gpx7, Gss, Gsta3, Gstm2, Gstm5, Gstm7, Gsto1, Gstp1, Gstt1, Gstt2 and Mgst2.

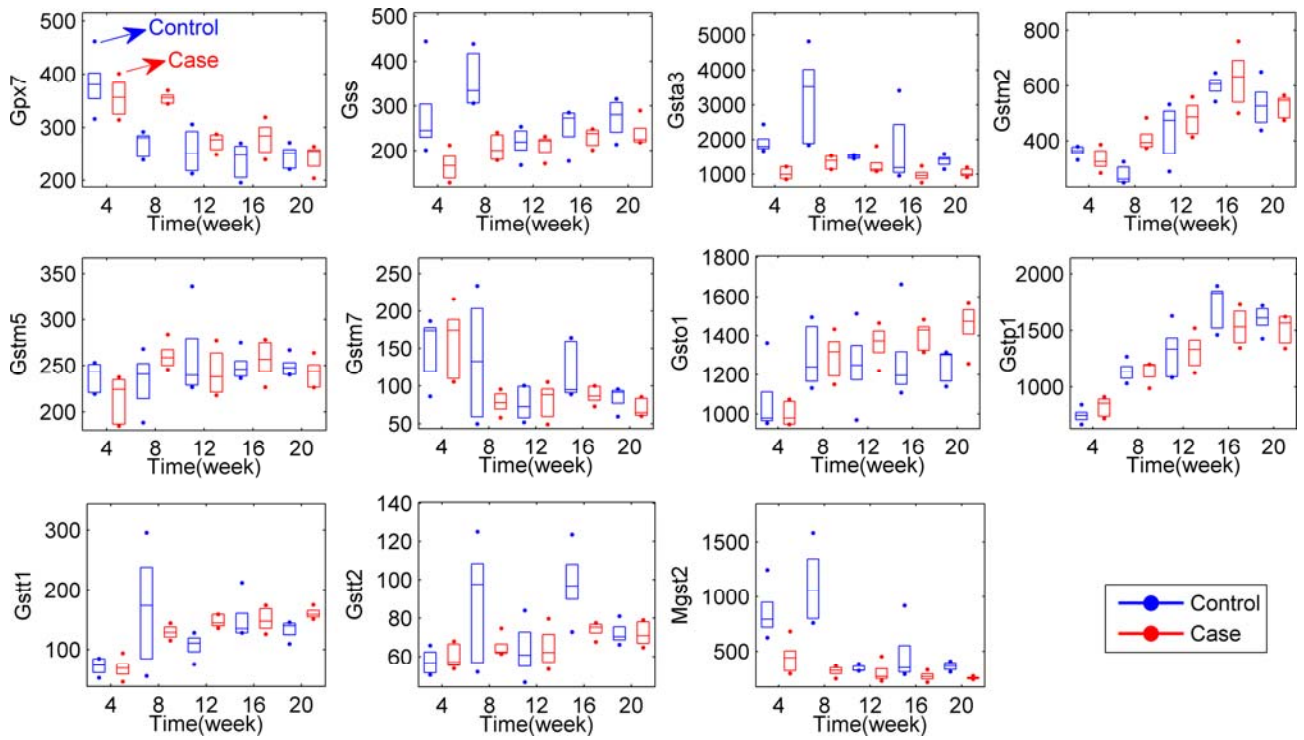

**Figure S22 | Comparison of expression values of the DNB genes (enriched in the Glutathione metabolism pathway) in the control with those in the case for the type 2 diabetes mellitus. Blue and red lines indicate control and case, respectively. The results reveal that most of these genes exhibit lower concentrations at almost each period in the diabetic subjects than those in the control subjects, except for Gpx7, Gstm2, Gsto1 and Gsit1.**

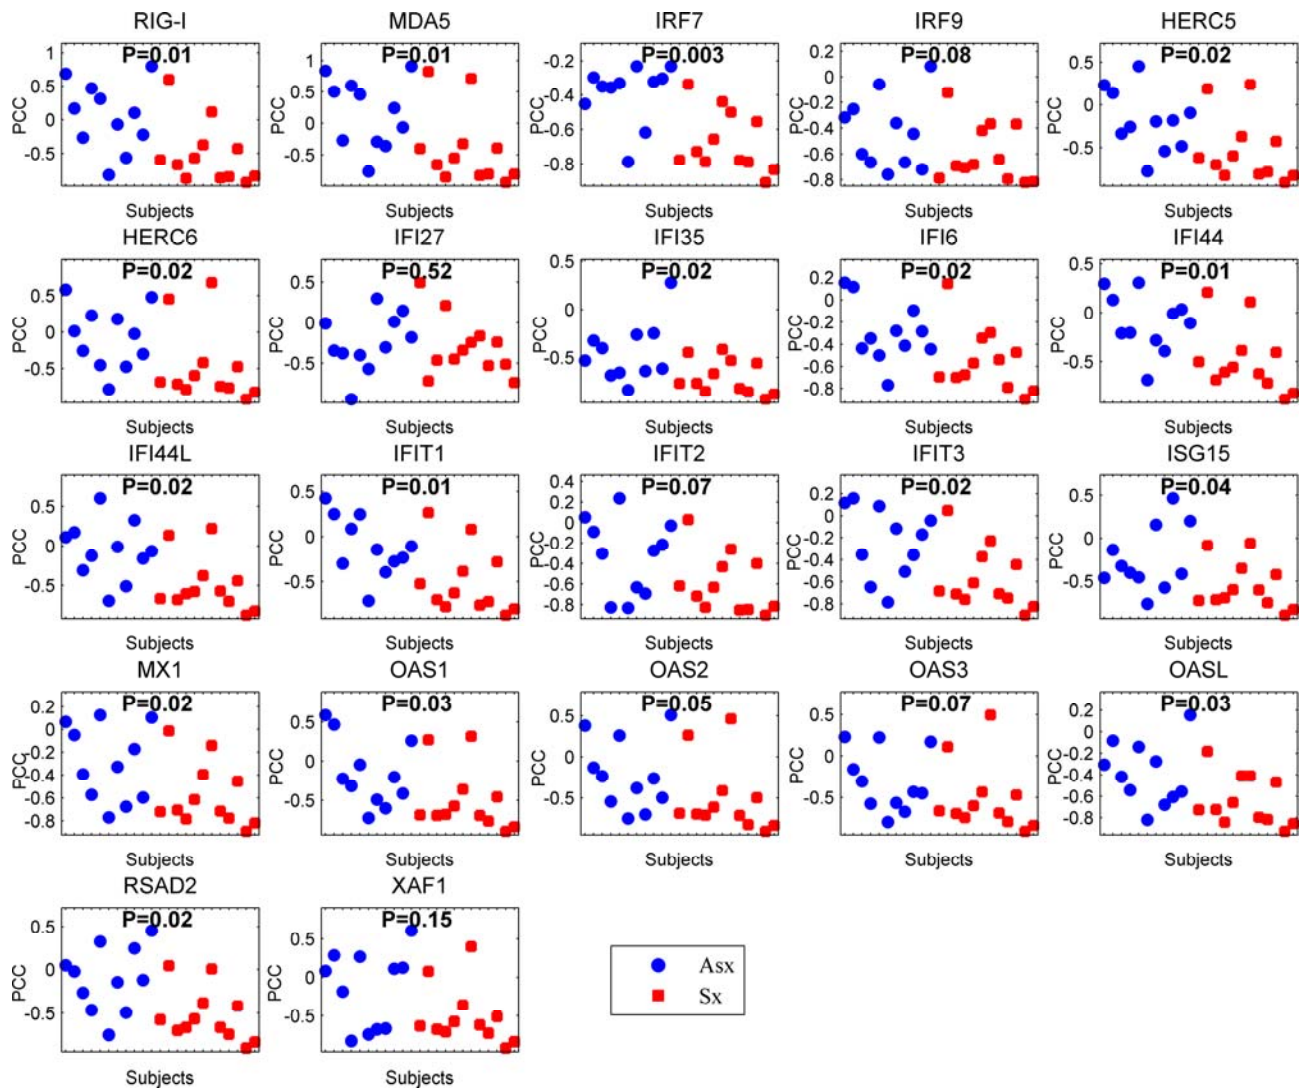

**Figure S23 | Comparison of the distributions of correlations between the expression values of S1PR1 and those of DNBs for the H1N1 strain.** Blue circles and red squares indicate Pearson correlation coefficient (PCC) between the expression values of S1PR1 and those of DNBs in the asymptomatic infection (Asx) with those in the symptomatic infection (Sx), respectively. X-axis represents the Asx or Sx subjects, namely control or case groups. Each data point corresponds to a correlation in one subject. P-values are from a two-tailed Wilcoxon rank sum test.

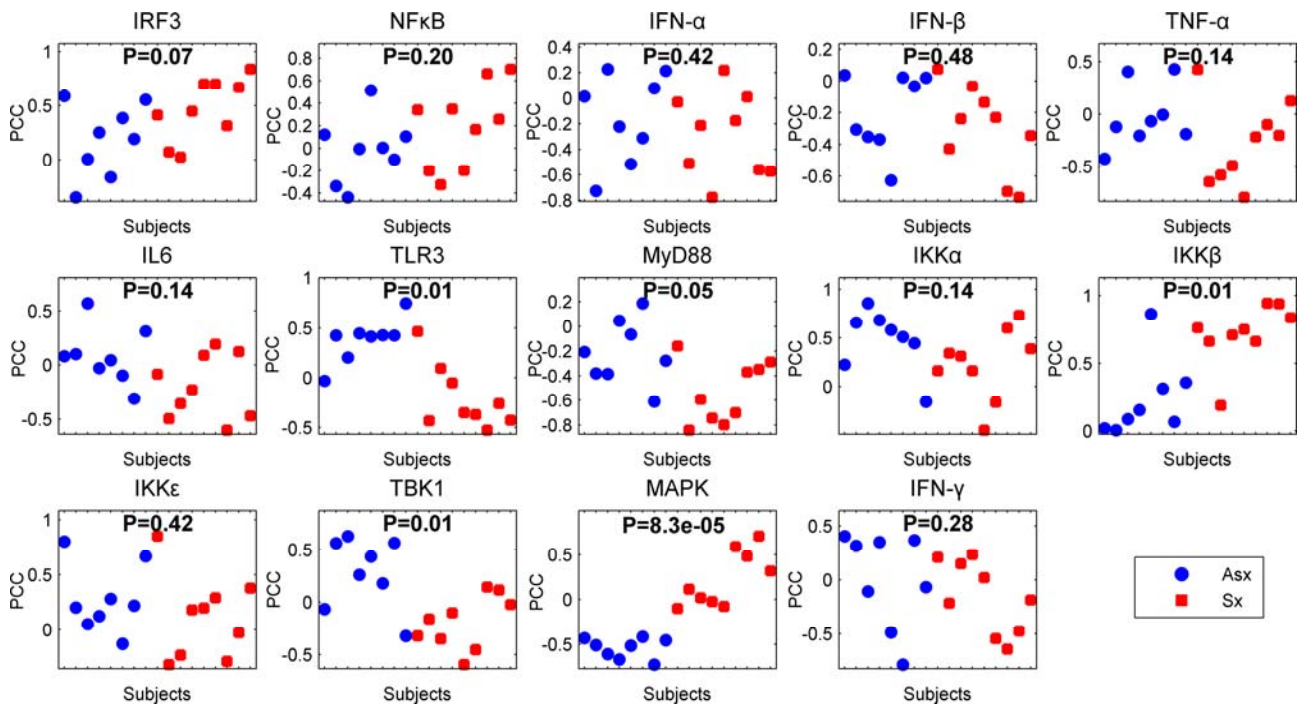

**Figure S24 | Comparison of the distributions of correlations between the expression values of S1PR1 and those of other 14 critical proteins for the H3N2 strain.** Blue circles and red squares indicate Pearson correlation coefficient (PCC) between the expression values of S1PR1 and those of other 14 critical proteins of innate immunity response in the asymptomatic infection (Asx) with those in the symptomatic infection (Sx), respectively. P-values are from a two-tailed Wilcoxon rank sum test. The difference between the distributions of correlations of the two clinical outcomes was not significant for the H3N2 strain (most of the P-values are larger than 0.05).

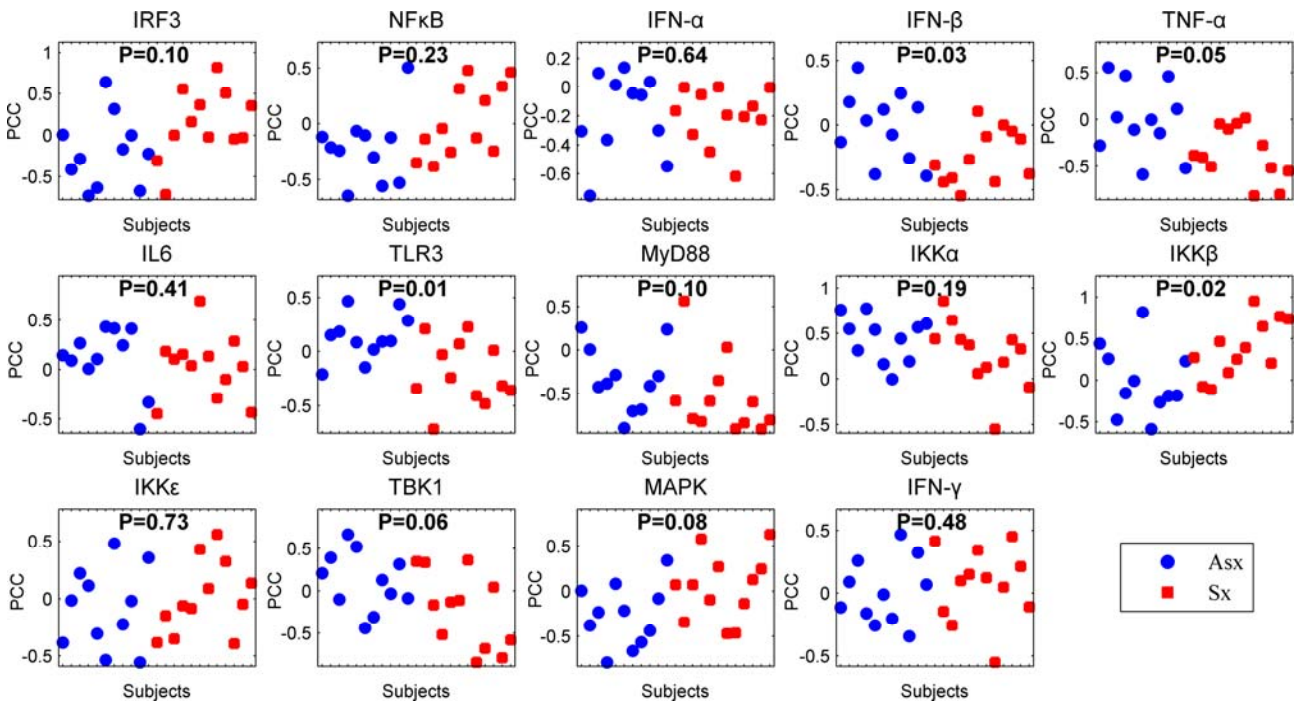

**Figure S25 | Comparison of the distributions of correlations between the expression values of S1PR1 and those of other 14 critical proteins for the H1N1 strain.** Blue circles and red squares indicate Pearson correlation coefficient (PCC) between the expression values of S1PR1 and those of other 14 critical proteins of innate immunity response in the asymptomatic infection (Asx) with those in the symptomatic infection (Sx), respectively. P-values are from a two-tailed Wilcoxon rank sum test. The difference between the distributions of correlations of the two clinical outcomes was not significant for the H1N1 strain (most of the P-values are larger than 0.05).

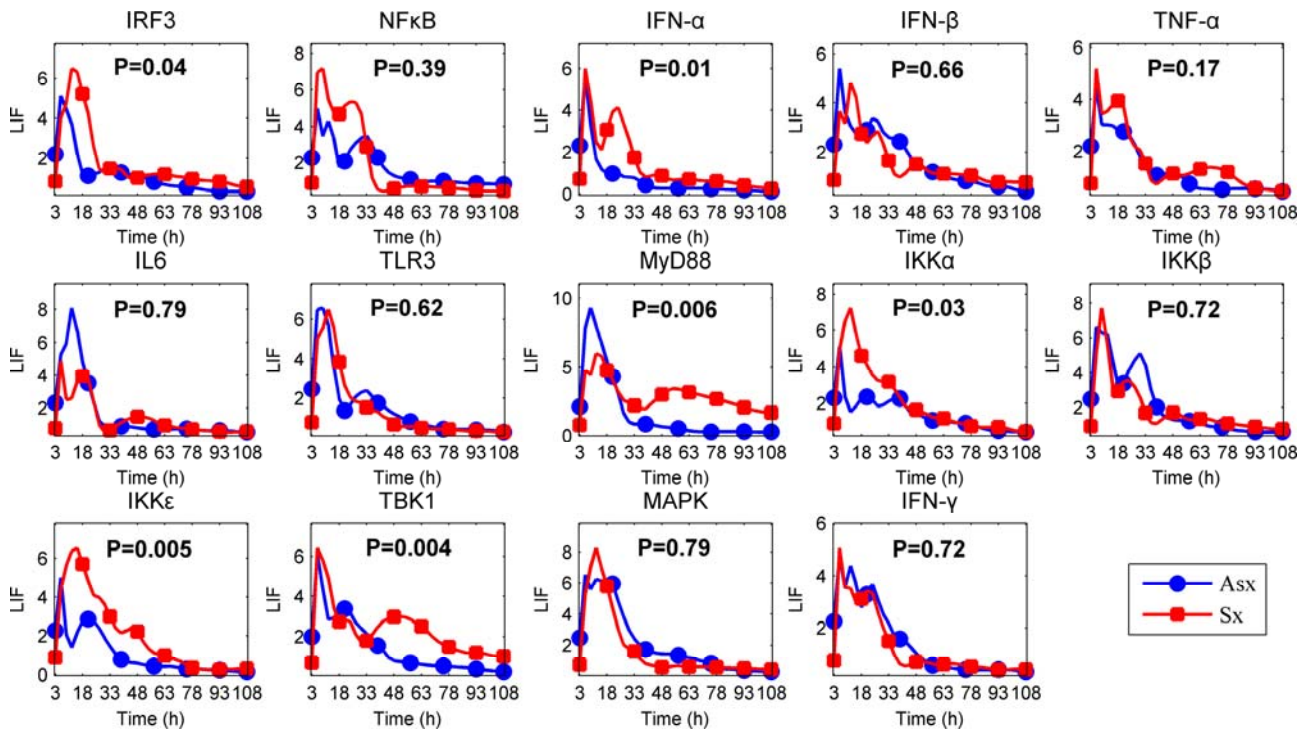

**Figure S26 | Comparison of the local information flows (LIF) transmission from virus to other 14 key proteins of innate immunity response in the symptomatic subjects (Sx) and the asymptomatic subjects (Asx) infected by the H3N2 influenza strain.** The blue and red lines denote the local information flows in Asx and Sx, respectively. Through performing a two-sample t-test, we showed that the local information flows exhibited no significant differences between Asx and Sx, except for MyD88, IKKε and TBK1.

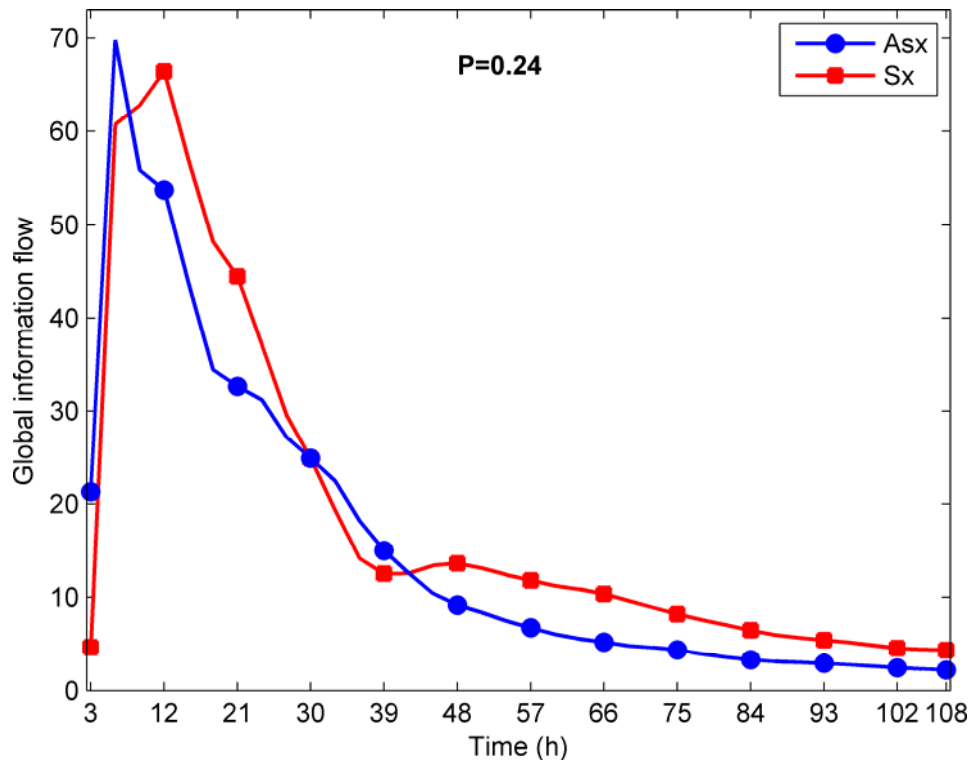

**Figure S27 | Comparison of the global information flows transmission from virus to other 14 key proteins of innate immunity response in the symptomatic subjects (Sx) and the asymptomatic subjects (Asx) infected by the H3N2 influenza strain.** P-value is from a two-sample t-test. The blue and red lines denote the global information flows in Asx and Sx, respectively. The result showed that there are not significant differences in the global information flows between Asx and Sx (P-value = 0.24).

## Supplementary Tables:

**Table S1 The 2400 proteins selected in the datasets GSE30550 and GSE52428**

| Symbol | Symbol  | Symbol    | Symbol   | Symbol    | Symbol  | Symbol  | Symbol  |
|--------|---------|-----------|----------|-----------|---------|---------|---------|
| ABCA5  | CCBL1   | ECHS1     | HIST1H4L | MICB      | PEX3    | RPL8    | TCEA2   |
| ABCB1  | CCBL2   | ECI2      | HIST3H3  | MICU1     | PEX5    | RPLP1   | TCEAL1  |
| ABCB11 | CCDC130 | ECM1      | HIVEP3   | MIF       | PFAS    | RPLP2   | TCEAL4  |
| ABCB4  | CCDC33  | EDC4      | HK3      | MIIP      | PFKFB3  | RPP14   | TCERG1  |
| ABCB7  | CCDC9   | EDEM1     | HLA-A    | MINA      | PFKM    | RPS11   | TCF20   |
| ABCB8  | CCL11   | EDEM2     | HLTF     | MIOS      | PFN1    | RPS13   | TCF25   |
| ABCC1  | CCL13   | EDF1      | HMG20A   | MIPEP     | PFN2    | RPS14   | TCF7    |
| ABCC3  | CCL2    | EDNRA     | HMGN1    | MIS12     | PGAP3   | RPS16   | TCF7L2  |
| ABCC5  | CCL22   | EDNRB     | HMGN3    | MKKS      | PGM5    | RPS19   | TCL1A   |
| ABCD1  | CCL25   | EED       | HMHA1    | MKL2      | PHACTR2 | RPS2    | TCN2    |
| ABCD2  | CCL5    | EEF1D     | HMOX1    | MKLN1     | PHB2    | RPS20   | TCP1    |
| ABCD4  | CCL7    | EEF2      | HMOX2    | MKKNK2    | PHF10   | RPS21   | TCP11   |
| ABCE1  | CCL8    | EFHC1     | HN1L     | MKRN2     | PHF11   | RPS23   | TDP1    |
| ABHD10 | CCNA1   | EFHC2     | HNF1A    | MLH1      | PHF15   | RPS24   | TDRD3   |
| ABLIM1 | CCNC    | EFNB1     | HNRNPA0  | MLLT11    | PHF16   | RPS3    | TDRD7   |
| ABLIM3 | CCND2   | EGF       | HNRNPA1  | MLLT3     | PHF21A  | RPS4X   | TENC1   |
| ABT1   | CCNG1   | EGFL7     | HNRNPC   | MLXIP     | PHLDA2  | RPS5    | TERF1   |
| ABTB2  | CCNG2   | EGLN2     | HNRNPD   | MMS19     | PHLPP2  | RPS6    | TESPA1  |
| ACAA2  | CCNL2   | EGR1      | HNRNPDL  | MOAP1     | PI4KA   | RPS6KA2 | TEX10   |
| ACACA  | CCR1    | EGR3      | HNRNPK   | MOCS2     | PIAS2   | RPS6KA3 | TFAP2B  |
| ACAD8  | CCR10   | EGR4      | HNRNPR   | MORC4     | PIBF1   | RPS6KA5 | TFB2M   |
| ACADS  | CCR6    | EHBP1     | HNRNPUL1 | MORF4L1   | PIK3C2B | RPS9    | TFEC    |
| ACAP1  | CCR7    | EHD4      | HOMER1   | MPDU1     | PIK3R1  | RRAS    | TGDS    |
| ACAT2  | CCSER2  | EI24      | HOXA3    | MPHOSPH10 | PIK3R4  | RRAS2   | TGFB111 |
| ACKR2  | CCT3    | EIF1AX    | HOXB2    | MPI       | PIKFYVE | RRBP1   | TGIF1   |
| ACKR3  | CCT4    | EIF2AK2   | HOXC6    | MPP5      | PILRA   | RREB1   | TGM4    |
| ACO1   | CCT7    | EIF2AK3   | HPGD     | MPRIP     | PILRB   | RRM1    | THADA   |
| ACP2   | CD101   | EIF2B3    | HPSE     | MRFAP1L1  | PIN1    | RRP15   | THAP11  |
| ACP6   | CD14    | EIF2D     | HPSE2    | MRPL20    | PIP4K2C | RRP1B   | THBS1   |
| ACTG1  | CD163   | EIF3A     | HR       | MRPL24    | PJA1    | RRS1    | THEMIS2 |
| ACTL6A | CD19    | EIF3D     | HS2ST1   | MRPL3     | PKIA    | RSAD1   | THY1    |
| ACTL6B | CD2     | EIF3E     | HSD11B1  | MRPL48    | PKMYT1  | RSAD2   | TICAM1  |
| ACTR1B | CD209   | EIF3G     | HSD17B12 | MRPL9     | PKP4    | RSBN1   | TIMM10  |
| ACTR2  | CD22    | EIF3H     | HSD17B4  | MRPS15    | PLA2G15 | RSL1D1  | TIMM22  |
| ACTR3B | CD226   | EIF3J     | HSD17B8  | MRPS2     | PLAC8   | RSRC1   | TIMM9   |
| ACTR5  | CD244   | EIF3K     | HSF2     | MRPS27    | PLAG1   | RTCB    | TIMP2   |
| ACTR6  | CD247   | EIF3L     | HSP90AB1 | MRPS31    | PLAUR   | RTN2    | TK1     |
| ACYPI  | CD27    | EIF4A1    | HSPA14   | MRTO4     | PLCB3   | RTP4    | TLE2    |
| ADAP2  | CD28    | EIF4A2    | HSPA8    | MS4A1     | PLCG1   | RUVBL1  | TLR5    |
| ADAR   | CD38    | EIF4ENIF1 | HSPA9    | MSH2      | PLCL2   | RWDD3   | TLR6    |
| ADCK3  | CD3D    | EIF4G2    | HSPB11   | MSH5      | PLEKHA1 | RYK     | TLR7    |



|          |          |          |         |         |         |         |          |
|----------|----------|----------|---------|---------|---------|---------|----------|
| ADCY6    | CD3E     | EIF5     | HTATIP2 | MSH6    | PLEKHA4 | RYR2    | TLR8     |
| ADD3     | CD3G     | ELF1     | HTATSF1 | MSL2    | PLEKHA5 | S100A4  | TLX1     |
| ADH6     | CD5      | ELF4     | HTR7    | MSR1    | PLEKHB1 | S1PR1   | TLX2     |
| ADK      | CD52     | ELOVL2   | HYAL2   | MST1R   | PLIN3   | S1PR2   | TMA16    |
| ADM      | CD6      | EMD      | IARS    | MST4    | PLSCR1  | SACS    | TMC6     |
| ADNP     | CD68     | EMG1     | IARS2   | MT1G    | PLTP    | SAE1    | TMCC2    |
| ADRA1A   | CD7      | EML3     | ICAM1   | MT1X    | PLXNB2  | SAMD4A  | TMED10   |
| ADRA1D   | CD72     | EML4     | ICK     | MT2A    | PLXNB3  | SAMD9   | TMED3    |
| ADRA2C   | CD79A    | ENO2     | ICOS    | MTA1    | PML     | SAMHD1  | TMEM62   |
| ADRBK2   | CD79B    | ENO3     | ID3     | MTCH1   | PMM1    | SAMM50  | TMEM66   |
| AES      | CD81     | EP400    | IDH1    | MTCP1   | PMPCA   | SAP30   | TMEM97   |
| AFF1     | CD8A     | EPAS1    | IDH2    | MTERFD1 | PMPCB   | SARS    | TNFAIP1  |
| AFF4     | CD8B     | EPB41    | IDO1    | MTM1    | PMS1    | SART3   | TNFAIP6  |
| AFP      | CDC14A   | EPB41L1  | IFI16   | MTMR1   | PNMA1   | SASH3   | TNFRSF1B |
| AGFG2    | CDC16    | EPB41L2  | IFI27   | MTMR11  | PNN     | SAT1    | TNFRSF25 |
| AGGF1    | CDC23    | EPB41L3  | IFI30   | MTMR2   | PNOC    | SATB1   | TNFSF10  |
| AGL      | CDC25B   | EPB41L5  | IFI35   | MTMR3   | PNRC1   | SAV1    | TNFSF15  |
| AGPAT1   | CDC25C   | EPHB1    | IFI44   | MTMR9   | PNRC2   | SBNO2   | TNIK     |
| AGPAT2   | CDC37L1  | EPHB2    | IFI44L  | MTOR    | POGZ    | SCAMP3  | TNK2     |
| AGPAT3   | CDC42EP2 | EPHX2    | IFI6    | MTR     | POLA1   | SCAP    | TNKS     |
| AGRN     | CDC42EP4 | EPM2A    | IFIH1   | MTRF1   | POLD2   | SCARA3  | TNNI3    |
| AGTPBP1  | CDC45    | EPM2AIP1 | IFIT1   | MUC1    | POLD3   | SCARB2  | TNNT2    |
| AHCTF1   | CDC7     | EPN1     | IFIT2   | MUS81   | POLDIP2 | SCARF1  | TNNT3    |
| AHNAK    | CDCA3    | EPN3     | IFIT3   | MVP     | POLE3   | SCCPDH  | TNPO1    |
| AHSA1    | CDCA4    | EPS8L1   | IFIT5   | MX1     | POLM    | SCLY    | TNPO2    |
| AIP      | CDH6     | ERAL1    | IFITM1  | MX2     | POLR1C  | SCMH1   | TOB1     |
| AIPL1    | CDK13    | ERBB2    | IFT20   | MXD1    | POLR1E  | SCO2    | TOMM20   |
| AK5      | CDK14    | ERCC3    | IFT57   | MYB     | POLR2B  | SDCCAG3 | TOMM22   |
| AKAP1    | CDK4     | ERCC5    | IGHD    | MYBL1   | POLR2G  | SDR39U1 | TOMM34   |
| AKAP11   | CDK5     | ERCC6L   | IGHM    | MYBL2   | POLR2H  | SEC24B  | TOMM70A  |
| AKAP13   | CDKN1A   | ERI3     | IKBKAP  | MYBPC3  | POLR2I  | SEC31B  | TONSL    |
| AKAP8    | CDKN1B   | ERP44    | IKZF4   | MYC     | POLR3B  | SEC61A1 | TOP1     |
| AKAP9    | CDKN1C   | ESPL1    | IL10    | MYD88   | POLR3E  | SEC61B  | TOP2B    |
| AKR1A1   | CDKN2B   | ESYT1    | IL10RA  | MYH6    | POLR3F  | SEC63   | TOR1A    |
| AKR1B1   | CDR2     | ETAA1    | IL11RA  | MYH9    | POMP    | SECTM1  | TOR1B    |
| AKR1C4   | CDV3     | ETV6     | IL13    | MYO10   | PON2    | SEH1L   | TP53I3   |
| AKT2     | CDX1     | ETV7     | IL15    | MYO15A  | POP5    | SEMA6B  | TPD52    |
| ALCAM    | CDX4     | EVL      | IL15RA  | MYO1D   | POU2AF1 | SEN3    | TPI1     |
| ALDH18A1 | CEACAM1  | EXOSC2   | IL16    | MYO7A   | PPAP2A  | SEN6    | TPMT     |
| ALDH1A2  | CEACAM3  | EXOSC8   | IL18RAP | MYO9A   | PPARD   | SEPHS1  | TPP1     |
| ALDH3B1  | CEACAM7  | EXPH5    | IL1B    | MYOD1   | PPAT    | SEPT11  | TPR      |
| ALDH9A1  | CELA3B   | EXT1     | IL1RL2  | MYOF    | PPIE    | SEPT4   | TPT1     |
| ALDOC    | CENPC    | EXTL2    | IL1RN   | MZF1    | PPIH    | SEPT6   | TRA2B    |
| ALG13    | CENPQ    | EZH1     | IL27RA  | MZT2B   | PPP1CA  | SEPT9   | TRAC     |
| ALMS1    | CEP192   | F11R     | IL2RA   | N4BP1   | PPP1CC  | SERBP1  | TRAF1    |

|          |        |         |          |          |          |          |          |
|----------|--------|---------|----------|----------|----------|----------|----------|
| ALPI     | CEP57  | F2RL2   | IL32     | NAA50    | PPP1R13B | SERP1    | TRAF3IP1 |
| AMMECR1  | CEP76  | FABP3   | IL4R     | NACA     | PPP1R15A | SERPINE1 | TRAF3IP3 |
| ANAPC10  | CERK   | FADS2   | IL7      | NADK     | PPP1R16B | SERPING1 | TRAF5    |
| ANAPC5   | CERS2  | FADS3   | IL7R     | NAE1     | PPP1R8   | SERTAD2  | TRAM1    |
| ANGPT2   | CETN3  | FAF1    | ILF2     | NAGK     | PPP2R4   | SESN1    | TRAPPC10 |
| ANKFY1   | CETP   | FAIM3   | ILF3     | NAP1L1   | PPP2R5E  | SET      | TRAPPC2  |
| ANKHD1   | CFB    | FAM120A | IMP3     | NAP1L2   | PPP3CA   | SETD3    | TRAPPC6A |
| ANKLE2   | CFLAR  | FAM13B  | IMPDH2   | NAP1L3   | PPP3CB   | SETD5    | TRAT1    |
| ANKRD28  | CFTR   | FAM162A | INADL    | NAP1L4   | PPP3CC   | SF3A3    | TRBC1    |
| ANP32B   | CGGBP1 | FAM168B | INPP4B   | NAPA     | PPP6C    | SF3B1    | TREX1    |
| ANP32C   | CHCHD7 | FAM178A | INPP5E   | NARS     | PPP6R2   | SF3B5    | TRIM13   |
| ANXA2    | CHD1L  | FAM208B | INPP5F   | NARS2    | PPP6R3   | SF11     | TRIM2    |
| ANXA3    | CHD3   | FAM46A  | INPP5J   | NAT10    | PPRC1    | SFMBT1   | TRIM21   |
| ANXA5    | CHD9   | FAM64A  | INSL3    | NAT6     | PRDM1    | SFRP1    | TRIM22   |
| ANXA7    | CHEK2  | FAN1    | INSR     | NAT8B    | PRDM10   | SGK1     | TRIM23   |
| APBA2    | CHN1   | FANCA   | INTS8    | NBEA     | PRDM2    | SGSM2    | TRIM25   |
| APBB1IP  | CHP2   | FANCE   | IPCEF1   | NBN      | PRDM4    | SH2B1    | TRIM26   |
| APEH     | CHPF   | FANCF   | IPO5     | NCALD    | PREPL    | SH2D1A   | TRIM28   |
| APEX1    | CHRNA6 | FANCG   | IPP      | NCAM1    | PRICKLE3 | SH2D3A   | TRIM32   |
| APEX2    | CIAO1  | FARS2   | IQCB1    | NCAPD3   | PRIM1    | SH2D4A   | TRIM38   |
| APITD1   | CIB1   | FASTKD1 | IRAK3    | NCAPH    | PRIM2    | SH3BP2   | TRIM5    |
| APOA2    | CIR1   | FASTKD2 | IRF1     | NCBP1    | PRKACB   | SH3BP4   | TRIP11   |
| APOBEC3G | CIRBP  | FAU     | IRF2     | NCBP2    | PRKCA    | SH3BP5   | TRIP6    |
| APOBR    | CKAP2  | FBL     | IRF7     | NCK1     | PRKCD    | SH3GLB1  | TRIT1    |
| APOL1    | CKAP4  | FBP2    | IRF9     | NCKAP1L  | PRKCG    | SHC3     | TRMT11   |
| APOL6    | CKM    | FBXO11  | IRS2     | NCL      | PRKCH    | SHMT2    | TRMT112  |
| APPL1    | CLASP2 | FBXO21  | ISCU     | NCOA4    | PRKCI    | SHQ1     | TRMT61B  |
| APPL2    | CLCN2  | FBXO3   | ISG15    | NCR3     | PRKCQ    | SIAH1    | TRPM2    |
| APRT     | CLDN18 | FBXO46  | ISG20    | NCSTN    | PRKCSH   | SIGIRR   | TRPV4    |
| APTX     | CLEC2D | FBXW4   | ITGA6    | NDC1     | PRKCZ    | SIGLEC1  | TRPV5    |
| AQP3     | CLINT1 | FCER1A  | ITGA7    | NDRG3    | PRKD3    | SIK1     | TRPV6    |
| AQR      | CLK2   | FCER1G  | ITGAE    | NDST1    | PRKDC    | SIN3B    | TRRAP    |
| ARF3     | CLOCK  | FCHO1   | ITGB3    | NDUFA10  | PRKRA    | SIRPG    | TSC1     |
| ARFGEF1  | CLPB   | FCN1    | ITGB3BP  | NDUFB11  | PRKRIP1  | SIRT1    | TSC22D4  |
| ARFIP2   | CLPP   | FFAR2   | ITGB4    | NDUFB8   | PRMT1    | SIRT3    | TSN      |
| ARHGAP15 | CLSTN1 | FGF16   | ITK      | NDUFS3   | PRMT2    | SIT1     | TSPYL1   |
| ARHGAP26 | CLTC   | FGF5    | ITM2C    | NDUFV1   | PRNP     | SIVA1    | TSPYL4   |
| ARHGAP5  | CMPK1  | FGF9    | ITPK1    | NEBL     | PRPF31   | SIX3     | TSPYL5   |
| ARHGDIB  | CMTR1  | FGFR3   | ITPKB    | NELFA    | PRPF39   | SKAP1    | TSSC1    |
| ARHGEF11 | CNGA1  | FGL2    | ITPKC    | NELL2    | PRPF4B   | SKIV2L2  | TTC19    |
| ARHGEF17 | CNIH1  | FH      | ITPR1    | NET1     | PRPF8    | SKP1     | TTC27    |
| ARHGEF18 | CNNM3  | FHL3    | ITPR3    | NEU3     | PRPS1    | SKP2     | TTC3     |
| ARHGEF6  | CNOT7  | FIBP    | ITSN1    | NEURL    | PRR16    | SLAMF1   | TTC37    |
| ARHGEF7  | CNP    | FIG4    | IVNS1ABP | NFATC2IP | PRR5L    | SLAMF8   | TTL5     |
| ARHGEF9  | CNPY2  | FKBP14  | JAK2     | NFATC3   | PRSS21   | SLBP     | TTN      |

|         |         |         |               |          |           |          |         |
|---------|---------|---------|---------------|----------|-----------|----------|---------|
| ARIH2   | COCH    | FKBP15  | JMJD7-PLA2G4B | NFE2L1   | PSEN1     | SLC11A2  | TUBA4A  |
| ARL1    | COG2    | FKBP3   | JOSD1         | NFIL3    | PSEN2     | SLC15A3  | TUBA8   |
| ARL5A   | COG5    | FLT3LG  | JUND          | NFKBIB   | PSIP1     | SLC16A1  | TUBB    |
| ARMC1   | COIL    | FLT4    | KANK1         | NFKBIE   | PSMB2     | SLC16A3  | TUBGCP3 |
| ARMC8   | COL4A3  | FN3KRP  | KAT6B         | NFS1     | PSMB4     | SLC19A2  | TUBGCP4 |
| ARPC5L  | COL8A2  | FNBP1   | KCND1         | NFU1     | PSMB9     | SLC1A3   | TUBGCP5 |
| ARSA    | COMMD3  | FNBP4   | KCNH6         | NFX1     | PSMD5     | SLC22A11 | TXK     |
| ARSB    | COPS7B  | FNTA    | KCNJ2         | NFYB     | PSME1     | SLC22A4  | TXN2    |
| ARSD    | COPS8   | FOLR2   | KCNJ6         | NGDN     | PSME2     | SLC25A12 | TXNRD3  |
| ASB1    | COPZ1   | FOSL2   | KCNMA1        | NGLY1    | PSPN      | SLC25A17 | TYMP    |
| ASB9    | COQ9    | FOXJ3   | KCNMB1        | NHP2     | PTBP2     | SLC25A3  | UAP1    |
| ASF1A   | CORO1B  | FOXN2   | KDM3A         | NHP2L1   | PTCD2     | SLC25A32 | UAP1L1  |
| ASGR2   | COX11   | FOXO1   | KDM3B         | NIF3L1   | PTCD3     | SLC25A5  | UBA2    |
| ASH1L   | COX4I1  | FOXP3   | KDM4C         | NIPSNAP1 | PTCRA     | SLC31A1  | UBA5    |
| ASH2L   | COX6C   | FSTL1   | KDM5B         | NISCH    | PTDSS1    | SLC33A1  | UBA7    |
| ASIP    | CPD     | FTO     | KHDRBS1       | NIT2     | PTGES2    | SLC35C1  | UBASH3A |
| ASNS    | CPNE7   | FTSJ1   | KHK           | NKIRAS2  | PTGES3    | SLC35D2  | UBE2C   |
| ASUN    | CPSF3L  | FUBP3   | KIAA0226      | NKTR     | PTGIR     | SLC35F6  | UBE2D2  |
| ASXL1   | CPSF7   | FURIN   | KIAA1279      | NKX3-2   | PTK2B     | SLC37A1  | UBE2G1  |
| ATAD2   | CR2     | FUT4    | KIAA1598      | NKX6-1   | PTOV1     | SLC38A1  | UBE2G2  |
| ATAD3A  | CRBN    | FXN     | KIF13B        | NLK      | PTPLAD1   | SLC39A1  | UBE2I   |
| ATF3    | CRCT1   | FXYD5   | KIF1C         | NLRP1    | PTPLB     | SLC39A14 | UBE2L6  |
| ATF5    | CREBZF  | FYB     | KIF20B        | NME3     | PTPN11    | SLC39A6  | UBE3A   |
| ATF7IP2 | CRHR2   | FYCO1   | KIF21B        | NMI      | PTPN21    | SLC3A2   | UBE4A   |
| ATG14   | CRIM1   | FYN     | KIF3C         | NMT2     | PTPN22    | SLC4A7   | UBE4B   |
| ATG3    | CRLF1   | FZD2    | KIFAP3        | NNT      | PTPN7     | SLC6A12  | UBR5    |
| ATG5    | CRNN    | FZD6    | KIR3DL3       | NOC3L    | PTPRC     | SLC6A4   | UBTF    |
| ATG7    | CRTAM   | G0S2    | KIT           | NOD1     | PTPRCAP   | SLC7A6   | UBXN4   |
| ATIC    | CRY1    | GABRD   | KLF2          | NOL11    | PTPRK     | SLC7A7   | UBXN7   |
| ATM     | CRYBB3  | GADD45B | KLF4          | NOL3     | PTPRM     | SLC8A1   | UCKL1   |
| ATP13A2 | CRYZ    | GADD45G | KLF5          | NONO     | PTPRN     | SLC9A3R1 | UFC1    |
| ATP1A1  | CSDE1   | GALE    | KLF9          | NOP56    | PTPRU     | SLC9A5   | UFL1    |
| ATP1B3  | CSE1L   | GALK1   | KLHDC2        | NOS3     | PUM1      | SLC9A6   | UFM1    |
| ATP5A1  | CSH1    | GALNT4  | KLHDC3        | NOSIP    | PUM2      | SMAD1    | UFSP2   |
| ATP5B   | CSNK1D  | GALT    | KLHL20        | NOTCH4   | PURA      | SMAD2    | UGDH    |
| ATP5G2  | CSNK1G3 | GAP43   | KLHL22        | NPAT     | PUS1      | SMARCA2  | UMPS    |
| ATP5H   | CSNK2A2 | GAR1    | KLHL3         | NPBWR2   | PUS7      | SMARCA4  | UNC93B1 |
| ATP6AP2 | CST4    | GAS6    | KLRB1         | NPC1     | PVRL2     | SMARCC1  | UPB1    |
| ATPIF1  | CSTF1   | GAS7    | KLRG1         | NPEPPS   | PWP1      | SMARCD3  | UPF3A   |
| ATRX    | CTCF    | GATA3   | KLRK1         | NPHP4    | QARS      | SMARCE1  | UPF3B   |
| ATXN10  | CTDSP1  | GATM    | KNTC1         | NPM1     | QPRT      | SMC2     | URI1    |
| ATXN2   | CTNNA1  | GBE1    | KPNA1         | NPM3     | QRSL1     | SMC4     | USE1    |
| AUH     | CTNND1  | GBP1    | KPNB1         | NPPA     | QTRT1     | SMC6     | USO1    |
| AVPR2   | CTSE    | GBP2    | KRBOX4        | NPRL2    | RAB11FIP2 | SMCR7L   | USP13   |
| AXL     | CTSL    | GCFC2   | KRIT1         | NPY4R    | RAB22A    | SMEK1    | USP14   |

|         |         |         |          |         |          |          |         |
|---------|---------|---------|----------|---------|----------|----------|---------|
| AZI1    | CUL1    | GCG     | KRR1     | NR2C1   | RAB3D    | SMPD2    | USP16   |
| AZIN1   | CUL3    | GCH1    | KRT10    | NR2E1   | RAB40B   | SMURF1   | USP20   |
| B3GALT2 | CUL4A   | GCHFR   | KYNU     | NR3C1   | RAB4A    | SMYD2    | USP21   |
| B3GNT1  | CUL4B   | GCN1L1  | L1CAM    | NR3C2   | RAB6A    | SMYD3    | USP22   |
| B4GALT5 | CUL5    | GCNT1   | L2HGDH   | NR4A1   | RAB8B    | SNCB     | USP24   |
| BACE2   | CUTA    | GDI2    | L3MBTL1  | NRF1    | RABEP2   | SNCG     | USP25   |
| BACH2   | CUTC    | GDPD2   | LAGE3    | NRP2    | RABGEF1  | SNRNP200 | USP32   |
| BAG2    | CUX1    | GEMIN4  | LAIR1    | NSD1    | RABGGTB  | SNRNP40  | USP47   |
| BAG3    | CX3CR1  | GFPT1   | LANCL1   | NSG1    | RAD1     | SNRNP70  | USP48   |
| BAG5    | CXCL10  | GGA1    | LAP3     | NSMAF   | RAD17    | SNRPB    | USP7    |
| BAHCC1  | CXCL6   | GGA2    | LARP4    | NSMCE4A | RAD50    | SNRPF    | USP9X   |
| BAHD1   | CXCR3   | GGH     | LARP4B   | NT5E    | RAE1     | SNTB1    | UXS1    |
| BAI1    | CXCR4   | GGT1    | LAT      | NTSR1   | RALB     | SNX4     | UXT     |
| BAK1    | CXCR5   | GGT5    | LAX1     | NUCB1   | RALGAPA1 | SNX5     | VAMP1   |
| BANK1   | CXCR6   | GHSR    | LBR      | NUCB2   | RALGPS1  | SOCS1    | VCPIP1  |
| BAP1    | CXorf57 | GIF     | LCK      | NUDCD3  | RALY     | SOCS2    | VDAC3   |
| BATF3   | CYB5A   | GIMAP5  | LDB1     | NUDT9   | RANBP2   | SOCS3    | VDR     |
| BAZ2A   | CYBB    | GJA3    | LDHB     | NUFIP1  | RANBP9   | SOCS5    | VEGFB   |
| BBS1    | CYFIP1  | GLI3    | LDLRAP1  | NUP153  | RAP2B    | SOD1     | VIPR1   |
| BBS10   | CYFIP2  | GLMN    | LDOC1    | NUP155  | RARA     | SON      | VPRBP   |
| BBS9    | CYP11B2 | GLO1    | LEF1     | NUP160  | RASGRP1  | SORT1    | VPREB3  |
| BCAP31  | CYP17A1 | GLOD4   | LEMD3    | NUP210  | RASGRP2  | SOSTDC1  | VPS13A  |
| BCKDHB  | CYP1A1  | GLP1R   | LETMD1   | NUP43   | RASSF1   | SOX1     | VPS13C  |
| BCL11A  | CYR61   | GLS     | LGALS3BP | NUP50   | RBBP7    | SOX17    | VPS51   |
| BCL11B  | DAAM1   | GLTSCR2 | LGALS8   | NUP54   | RBCK1    | SP1      | VRK1    |
| BCL2L1  | DAP3    | GLUL    | LGALS9   | NUP88   | RBFA     | SP100    | VRK2    |
| BCL2L10 | DARS    | GMEB2   | LIAS     | NUPL2   | RBFOX1   | SP110    | VWA8    |
| BCL2L14 | DBF4    | GMPPA   | LIF      | NVL     | RBL2     | SPAG16   | WARS    |
| BCL7B   | DCAF11  | GNA15   | LILRB1   | NXF1    | RBM12    | SPCS1    | WAS     |
| BCL9    | DCAF8   | GNB2L1  | LILRB2   | NXT1    | RBM14    | SPDL1    | WBP11   |
| BCLAF1  | DCTD    | GNB5    | LILRB3   | OAS1    | RBM15    | SPECC1L  | WDR12   |
| BCR     | DCTPP1  | GNE     | LILRB4   | OAS2    | RBM25    | SPG7     | WDR3    |
| BCS1L   | DDAH2   | GNG7    | LIMA1    | OAS3    | RBM26    | SPHK1    | WDR48   |
| BDH1    | DDB1    | GNL3L   | LIME1    | OASL    | RBM34    | SPIB     | WDR59   |
| BDH2    | DDIT4   | GNPAT   | LIMK2    | OFD1    | RBM39    | SPOCK2   | WDR6    |
| BEND5   | DDO     | GNRH1   | LIN7A    | OGDH    | RBM4B    | SPR      | WDR62   |
| BHLHE41 | DDX1    | GNS     | LIPT1    | OGFR    | RBM5     | SPSB1    | WDR7    |
| BIN1    | DDX10   | GOLGA1  | LLGL2    | OGT     | RBM8A    | SPTAN1   | WDR73   |
| BIRC3   | DDX18   | GOLGA3  | LMBRD1   | OLA1    | RBMS2    | SPTB     | WDR77   |
| BLK     | DDX27   | GOLGA4  | LMNA     | OPA1    | RCAN3    | SPTLC2   | WDR83OS |
| BLMH    | DDX28   | GOLGA7  | LMNB1    | OPRL1   | RCN2     | SQRDL    | WHSC1   |
| BLVRA   | DDX39B  | GOLGA8A | LMO2     | OR2C1   | RDH8     | SRBD1    | WNT11   |
| BMP8B   | DDX42   | GORASP1 | LMX1B    | OR51E2  | REC8     | SRC      | WNT7B   |
| BMPR1A  | DDX46   | GORASP2 | LPCAT4   | ORC2    | RECK     | SRGAP2   | WRN     |
| BMPR2   | DDX47   | GOT1    | LPIN1    | ORC5    | RELB     | SRPK2    | WWP1    |

|           |         |         |         |          |          |         |         |
|-----------|---------|---------|---------|----------|----------|---------|---------|
| BMS1      | DDX5    | GP1BA   | LPXN    | ORM1     | REM1     | SRPRB   | XAF1    |
| BPTF      | DDX50   | GP9     | LRBA    | OSBP     | RENBP    | SRPX    | XBP1    |
| BRCC3     | DDX56   | GPATCH2 | LRIG1   | OSBPL10  | REPIN1   | SRRM1   | XPA     |
| BRD1      | DDX58   | GPATCH8 | LRMP    | OSBPL3   | RERE     | SRRT    | XPC     |
| BRD8      | DDX60   | GPD1L   | LRPPRC  | OSGEPL1  | RET      | SRSF1   | YAF2    |
| BRDT      | DEDD    | GPD2    | LRRC1   | OSM      | REV1     | SRSF10  | YEATS4  |
| BRIX1     | DENND1A | GPER1   | LRRC40  | OTOF     | REV3L    | SRSF11  | YES1    |
| BRWD1     | DENND4A | GPHN    | LRRC47  | OTUB1    | RFC1     | SRSF2   | YIPF1   |
| BSDC1     | DES     | GPR171  | LRRC59  | OXA1L    | RFC3     | SRSF3   | YLPM1   |
| BST1      | DFFB    | GPR18   | LSM14A  | OXCT1    | RFC4     | SRSF5   | YTHDC1  |
| BST2      | DGKA    | GPR183  | LSM2    | OXSM     | RFC5     | SRSF6   | YTHDC2  |
| BTAF1     | DGKD    | GPR21   | LSM4    | P2RX1    | RFX1     | SRSF7   | YTHDF1  |
| BTBD1     | DHPS    | GPRASP1 | LSM7    | P2RX7    | RFX2     | SRSF8   | YWHAQ   |
| BTG1      | DHRS3   | GPT     | LTB     | P2RY10   | RFX7     | SRSF9   | YWHAZ   |
| BTG3      | DHRS9   | GPX4    | LTBP3   | P2RY6    | RGCC     | SS18L1  | YY1     |
| BUB3      | DHX15   | GPX7    | LTBR    | P4HTM    | RGL1     | SSBP2   | ZAP70   |
| C10orf10  | DHX16   | GRAMD1C | LUC7L   | PAAF1    | RGS12    | SSR2    | ZBED4   |
| C10orf137 | DHX30   | GRIK1   | LUC7L2  | PABPC3   | RGS3     | SSR4    | ZBP1    |
| C10orf88  | DHX58   | GRM4    | LUC7L3  | PABPC4   | RGS7     | SSRP1   | ZBTB14  |
| C11orf57  | DHX9    | GRM5    | LY6E    | PAFAH1B2 | RHD      | ST3GAL2 | ZBTB18  |
| C11orf73  | DIABLO  | GRN     | LY6G6D  | PAFAH2   | RHO      | ST3GAL4 | ZBTB20  |
| C12orf43  | DIAPH2  | GSDMB   | LY9     | PAICS    | RHOF     | ST3GAL5 | ZBTB24  |
| C14orf1   | DIDO1   | GSK3A   | LYRM4   | PALB2    | RHOG     | ST6GAL1 | ZBTB25  |
| C14orf166 | DIEXF   | GSN     | LZTFL1  | PAN2     | RHOH     | ST8SIA1 | ZBTB5   |
| C15orf39  | DIMT1   | GSPT2   | MAF     | PANK2    | RIN1     | STAG1   | ZBTB7A  |
| C16orf80  | DIS3    | GSTO1   | MAFB    | PANK4    | RIN2     | STAR    | ZBTB7B  |
| C17orf70  | DISC1   | GTF2A1  | MAGED1  | PAPD7    | RINT1    | STARD8  | ZC3H12A |
| C19orf60  | DKC1    | GTF2A2  | MAGEH1  | PARK7    | RIOK2    | STAT1   | ZC3H14  |
| C19orf66  | DKK1    | GTF2F2  | MAK16   | PARN     | RIPK1    | STAT2   | ZC3HAV1 |
| C1GALT1   | DKKL1   | GTF2H1  | MAL     | PARP1    | RIPK2    | STAT3   | ZCCHC11 |
| C1QA      | DLAT    | GTF3C2  | MALT1   | PARP11   | RLBP1    | STAT4   | ZCCHC14 |
| C1QB      | DLG1    | GTF3C3  | MAN1B1  | PARP12   | RMDN3    | STAU2   | ZCCHC2  |
| C1QBP     | DLST    | GTF3C5  | MAN1C1  | PARP2    | RNASE1   | STC2    | ZEB1    |
| C2        | DNAH3   | GTPBP1  | MAN2A1  | PARP3    | RNASEH1  | STK25   | ZFP36   |
| C2orf44   | DNAH7   | GTPBP3  | MAP2K4  | PASK     | RNASEH2B | STK38   | ZHX2    |
| C3AR1     | DNAJA1  | GTPBP8  | MAP2K5  | PATZ1    | RNASEL   | STK39   | ZKSCAN7 |
| C4BPA     | DNAJA3  | GUCA1A  | MAP2K6  | PAX6     | RNF103   | STMN1   | ZMAT3   |
| C5        | DNAJB1  | GUCY1A3 | MAP3K14 | PAX7     | RNF113A  | STT3A   | ZMYM2   |
| C6orf48   | DNAJB12 | GUCY2F  | MAP3K4  | PAXIP1   | RNF115   | STUB1   | ZMYND11 |
| C7orf26   | DNAJB6  | GVINP1  | MAP3K6  | PBX2     | RNF122   | STX12   | ZNF10   |
| C7orf49   | DNAJB9  | GYG1    | MAP4K1  | PBX3     | RNF19B   | STX16   | ZNF107  |
| C8orf33   | DNAJC10 | GZMA    | MAP4K3  | PBXIP1   | RNF220   | STX18   | ZNF131  |
| CA9       | DNAJC16 | GZMK    | MAP4K5  | PCBP2    | RNF31    | STXBP1  | ZNF133  |
| CAB39     | DNAJC2  | H1FX    | MAPK14  | PCCA     | RNF38    | STYXL1  | ZNF135  |
| CABIN1    | DNAJC3  | H2AFJ   | MAPK9   | PCDHGA11 | RNF4     | SUCLA2  | ZNF14   |

|          |          |           |          |          |         |          |         |
|----------|----------|-----------|----------|----------|---------|----------|---------|
| CACNA1A  | DNAL4    | H2AFV     | MAPKAPK5 | PCID2    | RNF6    | SUCLG1   | ZNF140  |
| CACNA1G  | DNASE2   | HABP4     | MARCH3   | PCK2     | RNGTT   | SUGP2    | ZNF142  |
| CACNA1S  | DNMT3L   | HADH      | MARCKS   | PCM1     | RNH1    | SUN1     | ZNF146  |
| CACYBP   | DOCK4    | HADHA     | MARCKSL1 | PCMTD2   | RNMT    | SUN2     | ZNF174  |
| CADPS    | DOK3     | HAMP      | MAST2    | PCNP     | RNMTL1  | SUPT16H  | ZNF184  |
| CALCOCO2 | DOLPP1   | HARS      | MATR3    | PCNT     | RNPS1   | SUPT7L   | ZNF202  |
| CALD1    | DONSON   | HAUS3     | MBD4     | PCNXL4   | ROM1    | SUPV3L1  | ZNF205  |
| CALM1    | DPH5     | HBEGF     | MBTPS1   | PCSK6    | RORA    | SURF1    | ZNF212  |
| CALR     | DPP4     | HCFC1R1   | MCCC1    | PCSK7    | RPA1    | SURF2    | ZNF217  |
| CAMK2G   | DPP8     | HDAC1     | MCM3     | PCYT1A   | RPA2    | SUV420H1 | ZNF232  |
| CAMKMT   | DRAP1    | HDAC3     | MCM4     | PCYT1B   | RPGRIP1 | SWAP70   | ZNF239  |
| CAMLG    | DRD3     | HDAC9     | MCM7     | PDC      | RPL10   | SYN2     | ZNF24   |
| CAMSAP1  | DROSHA   | HEATR2    | MCPH1    | PDCD1    | RPL10L  | SYNE1    | ZNF274  |
| CAND1    | DSC1     | HECA      | MDC1     | PDCD11   | RPL11   | SYTL2    | ZNF281  |
| CANX     | DSG1     | HEG1      | MDFIC    | PDCD1LG2 | RPL12   | TACC1    | ZNF302  |
| CAPG     | DSTYK    | HEMK1     | MDH2     | PDCD2    | RPL13   | TAF11    | ZNF331  |
| CAPNS1   | DUSP12   | HERC1     | MDK      | PDCD4    | RPL13A  | TAF1C    | ZNF337  |
| CAPRN2   | DUSP13   | HERC2     | MEAF6    | PDCD6    | RPL14   | TAF1D    | ZNF354A |
| CAPZB    | DUSP2    | HERC5     | MECP2    | PDE4A    | RPL15   | TAF4     | ZNF395  |
| CARD9    | DUSP22   | HERC6     | MED14    | PDE6H    | RPL18   | TAF5     | ZNF45   |
| CASK     | DUSP3    | HERPUD1   | MED22    | PDE8A    | RPL19   | TAF9     | ZNF451  |
| CASP1    | DUSP5    | HEYL      | MEF2C    | PDGFA    | RPL22   | TAP1     | ZNF510  |
| CASP10   | DUSP6    | HFE       | MEF2D    | PDGFD    | RPL23   | TAP2     | ZNF512B |
| CASP4    | DUT      | HGF       | MEFV     | PDIA2    | RPL24   | TAPBP    | ZNF76   |
| CASP5    | DYNLT1   | HIBCH     | METAP1   | PDLIM4   | RPL27   | TARBP1   | ZNF764  |
| CASP6    | DYRK1A   | HINFP     | METAP2   | PDS5A    | RPL3    | TARBP2   | ZNF839  |
| CASP7    | DYRK2    | HINT1     | METTL17  | PDS5B    | RPL30   | TARDBP   | ZNHIT1  |
| CASP8AP2 | DYSF     | HIPK3     | METTL3   | PDS52    | RPL35A  | TASP1    | ZNHIT3  |
| CBL      | DZIP3    | HIST1H2AB | METTL5   | PDXDC1   | RPL36   | TAZ      | ZNHIT6  |
| CBLB     | E2F1     | HIST1H2AM | MEX3C    | PEBP1    | RPL37   | TBC1D4   | ZSCAN9  |
| CBR4     | E2F5     | HIST1H2BB | MFN1     | PERP     | RPL37A  | TBCE     | ZW10    |
| CBX1     | EBNA1BP2 | HIST1H3D  | MGA      | PEX1     | RPL38   | TBKBP1   | ZXDC    |
| CBX7     | ECE1     | HIST1H4E  | MGAT1    | PEX11B   | RPL4    | TBL1XR1  | ZYX     |
| CBY1     | ECHDC2   | HIST1H4H  | MICALL1  | PEX19    | RPL5    | TBP      | ZZZ3    |

**Table S2 The 770 proteins selected in the dataset GSE2565**

| Symbol   | Symbol  | Symbol             | Symbol   | Symbol    | Symbol             | Symbol    | Symbol    |
|----------|---------|--------------------|----------|-----------|--------------------|-----------|-----------|
| Aars     | Cd3g    | Eg383901           | Hipk2    | Loc672215 | Osmr               | Rfpl4     | Tek       |
| Abcc1    | Cd4     | Eg545124           | Hk2      | Loc677317 | Ottmusg00000014672 | Rgs11     | Tex10     |
| Abcd3    | Cd48    | Eg627245           | Hmga1    | Loc677319 | Ottmusg00000015538 | Rhoj      | Tfpi2     |
| Abhd14a  | Cd68    | Eg665937           | Hmgcs1   | Lox       | Pap0lg             | Rhou      | Tgds      |
| Ablim1   | Cd79a   | Eg666031           | Hmgxb3   | Lpl       | Pard6b             | Rin1      | Tgfb1i1   |
| Acadl    | Cd9     | Eg667723           | Hmox1    | Lrg1      | Pcf11              | Ripk4     | Tgif1     |
| Acadv1   | Cdc45l  | Egr1               | Hnnpul2  | Lrp2      | Pcx                | Rnasek    | Tgm2      |
| Acot10   | Cdca5   | Egr2               | Homer2   | Lrrc41    | Pde4b              | Rnf5      | Tgoln1    |
| Acot9    | Cdh2    | Eid1               | Hoxa4    | Lrrc59    | Pdgfb              | Rpa1      | Thbs1     |
| Acp5     | Cdh5    | Eif1a              | Hoxa5    | Lsm4      | Pdk2               | Rpl221l   | Thbs2     |
| Acta1    | Cdkn1a  | Eif2s2             | Hp       | Ltbp4     | Pdk4               | Rps17     | Thoc4     |
| Actn1    | Cdkn1c  | Eif3c              | Hs1bp3   | Lyve1     | Pecam1             | Rps27l    | Timp1     |
| Adamts4  | Cds2    | Eif3e              | Hs6st1   | Macrodl   | Pfn2               | Rps6ka2   | Timp3     |
| Adm      | Cdt1    | Eif3j              | Hsbp1    | Maff      | Pgd                | Rrm1      | Tinagl1   |
| Adss     | Cdv3    | Eif5               | Hsd17b12 | Mafk      | Pgk1               | Rrm2      | Tiparp    |
| Afp      | Cebpd   | Eif6               | Hsp90aa1 | Mal       | Phlda1             | Rrs1      | Tkt       |
| Ahcy12   | Cenpe   | Ell2               | Hsp90ab1 | Map2k6    | Phldb1             | Rsad2     | Tle6      |
| Aifm1    | Ces3    | Eln                | Hspa1a   | Map3k7ip3 | Phlpp              | Rtkn2     | Tlk2      |
| Akr1b8   | Ch25h   | Elov17             | Hspa1b   | March5    | Phxr4              | Rtn2      | Tm7sf3    |
| Akr1c13  | Chi31l  | Enc1               | Hspa5    | March7    | Pi4k2b             | Rwdd2b    | Tmcc2     |
| Aldh1a1  | Chic2   | Ensmusg00000040078 | Hspa8    | Mbd1      | Pim1               | S100a11   | Tmem119   |
| Aldh3a1  | Chmp4b  | Ensmusg00000050347 | Hspa9    | Mboat1    | Pim3               | S100a14   | Tmem159   |
| Aldoa    | Chorde1 | Epb4.115           | Hspb1    | Mcart1    | Pitpnc1            | S100a6    | Tmem184a  |
| Als2cr13 | Chrnbl  | Epha2              | Hspb8    | Mcee      | Pkm2               | S100a8    | Tmem37    |
| Amd-ps3  | Churc1  | Ercc6l             | Hspd1    | Mcm5      | Pkp2               | S100a9    | Tmem45a   |
| Ampd3    | Cidea   | Ereg               | Hspe1    | Mcm7      | Pkp3               | Samd8     | Tmem49    |
| Angptl4  | Ckb     | Errf1              | Hsph1    | Med8      | Pla1a              | Sars      | Tnc       |
| Anks1    | Cks1b   | Esd                | Id4      | Meis1     | Pla2g15            | Sash1     | Tnfrsf12a |
| Anln     | Cldn3   | Ext2               | Idi1     | Melk      | Pla2g4a            | Sc4mol    | Tnfsf12   |
| Anxa1    | Cldn4   | F3                 | Ier2     | Men1      | Plaa               | Scamp1    | Tnpo3     |
| Anxa3    | Cldn7   | F7                 | Ifi202b  | Mest      | Plaur              | Scd1      | Tnrc6c    |
| Anxa4    | Clec16a | Fabp4              | Ifi203   | Mett11d1  | Plcb3              | Scel      | Tob2      |
| Anxa7    | Clec4a2 | Fam108a            | Ifrd1    | Mgat5     | Plekhf1            | Scp2      | Topbp1    |
| Anxa8    | Clec4n  | Fam134b            | Igj      | Mif       | Plk3               | Sdc1      | Tor1b     |
| Aox1     | Clip4   | Fam69b             | Igsf5    | Mmp11     | Plod2              | Sdc3      | Tpi1      |
| Apoc2    | Clu     | Fanca              | Il1b     | Mmp15     | Plp2               | Sdccag3   | Tpm2      |
| Arc      | Clybl   | Fasn               | Il1r1    | Mmp3      | Plscr2             | Sec61a1   | Trak1     |
| Arcn1    | Col3a1  | Fbln2              | Il1r2    | Mprip     | Pmaip1             | Sec62     | Trdmt1    |
| Areg     | Col6a3  | Fbxo4              | Il33     | Mpzl2     | Pno1               | Selm      | Trf       |
| Arf3     | Cops3   | Fcgrt              | Impact   | Mrpl16    | Pnrc1              | Sema3f    | Trib3     |
| Arg1     | Coq7    | Fdps               | Incenp   | Mrpl28    | Podxl              | Sephs2    | Trim35    |
| Arg2     | Cotl1   | Fgfbp1             | Inmt     | Mrpl30    | Pomp               | Sept2     | Trip13    |
| Arhgap21 | Cpne1   | Fgfr4              | Ints6    | Mrpl46    | Pon3               | Serpina1a | Trp53inp1 |

|               |         |         |              |         |         |           |           |
|---------------|---------|---------|--------------|---------|---------|-----------|-----------|
| Arhgef12      | Creg1   | Fgfr1l  | Ipo4         | Mrpl51  | Ppa1    | Serpina1b | Tsc22d1   |
| Arid1a        | Crygn   | Fggy    | Ipo5         | Mrps12  | Ppan    | Serpina3n | Tsc22d3   |
| Arid5a        | Csflr   | Fgl1    | Ipo7         | Ms4a6d  | Ppap2b  | Serpina9b | Tspsy14   |
| Armxc4        | Csf3r   | Fkbp1b  | Irs2         | Ms4a8a  | Pparg   | Serpine1  | Ttc39c    |
| Arvcf         | Ctla2a  | Fkbp5   | Itgax        | Msln    | Ppl     | Serpine2  | Tuba4a    |
| Asns          | Ctps    | Flt3l   | Itgb5        | Msr1    | Ppp2r2a | Sfxn1     | Tubb2c    |
| Atf3          | Ctsh    | Fmn13   | Itih4        | Msrb2   | Pprc1   | Siah2     | Tuft1     |
| Atf4          | Ctsk    | Fmod    | Itm2b        | Mt1     | Prdx1   | Sin3b     | Tuse3     |
| Atl2          | Ctsz    | Fos     | Jam2         | Mt2     | Prdx6   | Skiv2l    | Txn1l     |
| Atp11a        | Cuta    | Fosl1   | Jun          | Mtch1   | Prelp   | Slc16a1   | Txnrd1    |
| Atp1a2        | Cxcl16  | Foxj1   | Junb         | Muc1    | Prkcb   | Slc16a7   | U2af1     |
| Atp6ap2       | Cxcl17  | Foxq1   | Kcnb1        | Mybbp1a | Prkci   | Slc1a1    | Ubap1     |
| Atp6v1a       | Cxcr7   | Fst     | Kcnk1        | Myc     | Prkd2   | Slc20a1   | Ubc       |
| Atxn10        | Cyp2a4  | Fxc1    | Kctd9        | Myet1   | Procr   | Slc25a13  | Ube2c     |
| Azi2          | Cyp4b1  | Gadd45a | Kif22        | Myd116  | Prr13   | Slc25a29  | Ube2f     |
| B3gnt4        | Cyp51   | Gadd45g | Kif23        | Myo5a   | Prss22  | Slc25a5   | Ube2k     |
| Bach1         | Cyp7b1  | Gars    | Kif2c        | Nampt   | Psat1   | Slc2a1    | Ubqln1    |
| Bach2         | Cyr61   | Gea     | Kit          | Nars    | Psd3    | Slc31a1   | Ubr3      |
| Bag3          | Cyth3   | Gch1    | Klf4         | Nbeal2  | Psma4   | Slc38a4   | Ubxn4     |
| Basp1         | Dab2ip  | Gclc    | Klf5         | Nbr1    | Psma5   | Slc3a2    | Uchl1     |
| Beat2         | Dbi     | Gclm    | Klf6         | Nck1    | Psma7   | Slco3a1   | Uchl3     |
| Bcl10         | Dbnl    | Gdpd2   | Klhdc8a      | Ncl     | Psmb4   | Smo       | Uchl5     |
| Bex2          | Debl1   | Ghitm   | Klhl2        | Ndr1    | Psmb5   | Snhg1     | Uhrf1     |
| Blvrb         | Dctn5   | Ghr     | Kras         | Nedd4l  | Psmb6   | Snhg6     | Uhrf1bp11 |
| Bmp6          | Dctpp1  | Gja1    | Krt18        | Nfkb1a  | Psmc1   | Snx5      | Unc84a    |
| Bnip3         | Ddi2    | Gjb3    | Krt19        | Ngfrap1 | Psmc2   | Socs3     | Unc84b    |
| Bola2         | Ddit3   | Gla     | Krt7         | Nhp2    | Psmc6   | Sorcs2    | Uqcrfs1   |
| Brd2          | Ddit4   | Glg1    | Krt8         | Nipbl   | Psmd1   | Sor11     | Usp7      |
| Btg2          | Ddx39   | Glul    | Kti12        | Nkain4  | Psmd14  | Spes3     | Vamp5     |
| Bub1b         | Ddx50   | Gnaz    | Lace1        | Nkg7    | Psmd3   | Spnb2     | Vcam1     |
| C1r           | Dedd2   | Gnl3    | Lama3        | Nmd3    | Psmd5   | Spp1      | Vcp       |
| C330027c09rik | Dgat2   | Gp49a   | Lamc2        | Nme2    | Psmd6   | Sqle      | Vwa5a     |
| C4b           | Dhx32   | Gpre5c  | Lcn2         | Nme7    | Ptbp1   | Sqrdl     | Wbp5      |
| C630004h02rik | Dmkn    | Gpx2    | Ldha         | Notch2  | Ptges   | Sqstm1    | Wsb1      |
| Cacnb2        | Dnaja1  | Grb10   | Ldlr         | Nov     | Ptgr1   | Sri       | Xbp1      |
| Cacybp        | Dnaja4  | Gsr     | Lgals1       | Npm1    | Ptgs1   | Srm       | Xpot      |
| Carkd         | Dnajb1  | Gsta1   | Lgals3       | Nqo1    | Ptgs2   | Srxn1     | Ypel3     |
| Cbfa2t3       | Dnajb4  | Gsta2   | Lgals3bp     | Nr1d1   | Ptms    | Ssna1     | Yrdc      |
| Cbr3          | Dnajb9  | Gsta3   | Lif          | Nr4a1   | Ptp4a1  | Sssca1    | Ythdf2    |
| Ccdc117       | Dnajc2  | Gsta4   | Litaf        | Nsmce1  | Ptp4a3  | Stat3     | Zbtb16    |
| Ccdc88c       | Dnajc21 | Gtf2f2  | Loc100046232 | Nsun4   | Ptplb   | Stat5b    | Zc3h18    |
| Ccl12         | Dnajc5  | Gtf3c1  | Loc100046344 | Nup210  | Ptpn14  | Stk40     | Zeb1      |
| Ccl2          | Dnpep   | Gtlf3b  | Loc100046567 | Nup50   | Ptpn21  | Stt3a     | Zeb2      |
| Ccl6          | Dpy30   | Gusb    | Loc100047601 | Nup54   | Pttg1   | Sult1a1   | Zfand2a   |
| Ccng2         | Dtl     | H2afx   | Loc100047840 | Nupl1   | Qsox1   | Surf4     | Zfp110    |



|        |          |        |              |        |        |         |         |
|--------|----------|--------|--------------|--------|--------|---------|---------|
| Ccn1   | Dusp1    | Has2   | Loc100047868 | Nupr1  | Rab31  | Tacc3   | Zfp207  |
| Ccr1   | Dusp16   | Hbegf  | Loc100047896 | Obfc2a | Rabl4  | Taldo1  | Zfp281  |
| Ccr2   | E2f6     | Hdac5  | Loc100048076 | Ogfr11 | Rad23b | Tapbp   | Zfp292  |
| Ccr5   | Ebi3     | Helz   | Loc14210     | Ogn    | Ranbp1 | Taz     | Zfp36   |
| Ccrn4l | Edem3    | Hes6   | Loc630729    | Omd    | Rarg   | Tbc1d15 | Zfp574  |
| Cct3   | Edn1     | Hexb   | Loc635418    | Orf61  | Rars   | Tbca    | Zfp90   |
| Cct6a  | Eef2k    | Higd2a | Loc638798    | Orm1   | Rdh10  | Tbx2    | Zkscan1 |
| Cd2ap  | Efemp2   | Hint1  | Loc640441    | Osgin1 | Rfk    | Tc2n    | Zwint   |
| Cd300a | Eg103324 |        |              |        |        |         |         |

---

**Table S3 The 755 proteins selected in the dataset GSE13268**

| Symbol   | Symbol  | Symbol   | Symbol     | Symbol    | Symbol  | Symbol     | Symbol   |
|----------|---------|----------|------------|-----------|---------|------------|----------|
| Aanat    | Cald1   | Dnm1     | Gss        | LOC679958 | Parm1   | RGD1307682 | Sspl2a   |
| Abca3    | Calr    | Dnm2     | Gsta3      | LOC681004 | Pax8    | RGD1308059 | Spry2    |
| Abhd3    | Caly    | Dnm3     | Gsta5      | LOC682360 | PCOLCE2 | RGD1308117 | Sptbn1   |
| Acbd4    | Cant1   | Dpep1    | Gstm2      | LOC682469 | Pdc     | RGD1308448 | Sra1     |
| Acly     | Capza1  | Dpysl4   | Gstm5      | LOC682999 | Pde1b   | RGD1308772 | Srpx     |
| Acot2    | Car5b   | Dusp3    | Gstm7      | LOC685277 | Pde3b   | RGD1308782 | Ssfa2    |
| Acox1    | Card9   | Dync1h1  | Gsto1      | LOC685707 | Pde6d   | RGD1309350 | Stk32c   |
| Acpl2    | Cars    | Ebf1     | Gsto2      | LOC686774 | Pdgfr1  | RGD1309534 | Stmn4    |
| Acsf2    | Cast    | Ednrb    | Gstp1      | LOC687090 | Pdhh    | RGD1309540 | Strn     |
| Acsl4    | Cbx3    | Egfr     | Gstt1      | LOC688228 | Pdhx    | RGD1309651 | Sts      |
| Acsl5    | Ccdc127 | Egr1     | Gstt2      | LOC689147 | Pdia3   | RGD1309676 | Sulf2    |
| Acss2    | Ccdc17  | Ehd1     | Gtf2i      | LOC689329 | Pdia6   | RGD1310348 | Sult1a1  |
| Actr1a   | Ccl24   | Ehd2     | Guk1       | LOC691170 | Pdlim2  | RGD1310351 | Svep1    |
| Actr1b   | Ccl9    | Eif3d    | Gys2       | Loxl2     | Pdzr3   | RGD1310587 | Synj1    |
| Adamts15 | Ccna2   | Eif5a2   | Hbp1       | Ltv1      | Pfkfb3  | RGD1559909 | Synj2    |
| Adcy4    | Ccnb2   | Eif5b    | Hcca2      | Lyplal1   | Pgcp    | RGD1560011 | Tac1     |
| Adfp     | Cend2   | Emilin2  | Hcrtr2     | Lztr1     | Pgm5    | RGD1562284 | Tada11   |
| Adhfe1   | Cd163   | Enah     | Hes3       | Man1b1    | Pgrmc1  | RGD1562717 | Tbata    |
| Aga      | Cd209g  | Entpd4   | Hist2h2aa3 | Map2k1    | Pias3   | RGD1563422 | Tbc1d9b  |
| Agap2    | Cd55    | Epb4.1l2 | Hist3h2a   | Map2k2    | Picalm  | RGD1563684 | Tbl1x    |
| Agpat4   | Cd51    | Epc2     | Hmgcs2     | Map4k4    | Pigq    | RGD1563863 | Tcf25    |
| Ahcyl2   | Cd74    | Ephx2    | Hnrph1     | Map7d1    | Pik3r3  | RGD1564228 | Tcf7l2   |
| Ahnak    | Cd9     | Erh      | Homer2     | Mbd3      | Pim3    | RGD1564541 | Tect2    |
| Aig1     | Cd99    | Ermp1    | Hprt1      | Mdfic     | Pip5k1b | RGD1565002 | Tes      |
| Ak3      | Cdc20   | Esrra    | Hpx        | Me1       | Pir     | RGD1565432 | Tex15    |
| Ak3l1    | Cdc5l   | Etnk2    | Hs2st1     | Mecr      | Pitpnb  | Rgs7bp     | Tgfb1i1  |
| Akap12   | Cdh13   | Etv1     | Hsd11b2    | Med4      | Pja2    | Rhbdf1     | Tgfbr3   |
| Akr1b7   | Cdk105  | Fabp5    | Hsd17b12   | Meis2     | Plbd1   | Rmnd5b     | Tgm2     |
| Akt1     | Cdr2    | Fabp6    | Hsd17b8    | Meox2     | Plcb1   | Rraga      | Tgoln1   |
| Akt2     | Cela1   | Fah      | Hsf2       | Mettl6    | Plce1   | Rragc      | Tinag11  |
| Aldh1a1  | Cenpk   | Faim     | Hspa12a    | Mfn2      | Pld1    | Rrm2       | Tk1      |
| Aldh1a2  | Cep70   | Fam103a1 | Hspa4l     | MGC109340 | Pld2    | Scand1     | Tkt      |
| Alg11    | Ces3    | Fam105a  | Hspe1      | MGC72955  | Plekhg3 | Scara5     | Tmem120a |
| Anapc11  | Cetn2   | Fam107a  | Ica1       | MGC72974  | Plin    | Scd1       | Tmem150c |
| Ang1     | Cfp     | Fam117b  | Idh1       | Mgl1      | Plp2    | Scn7a      | Tmem160  |
| Angptl4  | Cgref1  | Fam171a1 | Ifrd2      | Mgmt      | Plxna2  | Scpep1     | Tmem195  |
| Ankrd52  | Chpt1   | Fat1     | Ift20      | Mgst2     | Pmepa1  | Sdf2       | Tmem206  |
| Ankrd6   | Chrdl1  | Fbln2    | Igfbp3     | Mipep     | Pmm1    | Sec62      | Tmem208  |
| Ano10    | Chrna1  | Fbn1     | Igfbp6     | Mki67     | Pnpla3  | Sel1l      | Tmem43   |
| Ano6     | Cirbp   | Fbxo23   | Igsf1      | Mmp2      | Pola2   | Selenbp1   | Tmem45b  |
| Anxa1    | Clen4-2 | Fbxo4    | Il13ra2    | Mospd1    | Pold2   | Selm       | Tmem50b  |
| Anxa5    | Clec10a | Fcrls    | Il17re     | Mpzl2     | Polr1c  | Senp6      | Tmsb11   |
| Anxa6    | Clec7a  | Fdx11    | Il18bp     | Mrp63     | Pols    | Sept8      | Tnfaip1  |

|          |            |        |              |        |          |           |          |
|----------|------------|--------|--------------|--------|----------|-----------|----------|
| Ap2a2    | Cltb       | Fgf11  | I134         | Mrpl21 | Ppap2c   | Serf1     | Tp53i13  |
| Ap2s1    | Cma1       | Fgfr1  | Ipmk         | Mrpl32 | Ppapdc1b | Serpina12 | Trdmt1   |
| Ap3m2    | Cmc1       | Fgl2   | Iscu         | Mrpl37 | Ppie     | Serpib9   | Trhde    |
| Apex1    | Cmtm6      | Fhl1   | Isoc1        | Msh2   | Ppm1k    | Serpinf1  | Trip10   |
| Apln     | Cndp1      | Fitm2  | Itgam        | Mt1a   | Ppp1cc   | Serpinh1  | Tshr     |
| Apln     | Cnih4      | Fkbp11 | Itgb2        | Mterf  | Ppp2r2b  | Setd3     | Tslp     |
| Aplp1    | Cnksr2     | Fkbp1a | Itgb5        | Mtmr10 | Ppp4r2   | Sft2d2    | Tsnax    |
| Aplp2    | Cnot1      | Fmo1   | Kcnd3        | Mxd4   | Pqlc1    | Sfxn1     | Tspan12  |
| App12    | Cnr1       | Fmo2   | Kcnip1       | Mxra8  | Prdx3    | Sgms1     | Tspan9   |
| Arhgdib  | Col15a1    | Fmo3   | Kcns3        | Myeov2 | Prdx4    | Sh2d4a    | Ttc1     |
| Arhgef15 | Col4a1     | Fn1    | Kctd10       | N6amt2 | Prl6a1   | Sh3bgr1   | Ttc25    |
| Arhgef18 | Col4a2     | Fndc1  | Kctd9        | Nanos3 | Prom1    | Sh3bgr13  | Ttc27    |
| Armc9    | Col5a2     | Folr1  | Kifap3       | Nck2   | Prpsap2  | Sh3tc1    | Tubb3    |
| Armcx1   | Col5a3     | Foxn3  | Kifc1        | Ndufb3 | Prss23   | Shmt1     | Tubb5    |
| Asf1a    | Col8a1     | Frmf5  | Klf15        | Ndufc1 | Psm4     | Siglec5   | Tuse4    |
| Asgr2    | Copb2      | Frs2   | Klf9         | Neol   | Psm6     | Slain2    | Tuse5    |
| Asna1    | Cp         | Frzb   | Klhdc5       | Nfia   | Psme2    | Slc12a4   | Twsg1    |
| Atf5     | Cpeb1      | Fstl1  | Lamb2        | Nfkb1  | Pter     | Slc17a5   | Uap111   |
| Atl2     | Cpne8      | Ftsj3  | Lamp1        | Nfkb1a | Ptpm     | Slc20a1   | Uchl1    |
| Atp2b3   | Crebl2     | Fxyd5  | Larp5        | Nfyc   | Ptprr    | Slc25a1   | Ulk2     |
| Atp4a    | Crebzf     | Fzd1   | Lcmt1        | Nit1   | Ptprz1   | Slc25a36  | Unc93b1  |
| Atp4b    | Crim1      | G6pd   | Ldhd         | Nkain3 | Purg     | Slc2a3    | Usf2     |
| Atp6v0c  | Crlf2      | Gbe1   | Lef1         | Nkd1   | Pwwp2a   | Slc31a2   | Usp39    |
| Atpif1   | Crot       | Gbp2   | Lgals3       | Nkx3-1 | Pxdn     | Slc35a1   | Utp15    |
| Atrn     | Csf2ra     | Gcgr   | Lgr4         | Nlk    | Pxk      | Slc38a10  | Utp3     |
| Atxn2    | Csgalnact1 | Gdap2  | Lhx5         | Nme1   | Pygl     | Slc38a7   | Uxs1     |
| Atxn2l   | Ctbp2      | Geft   | Lipa         | Nnmt   | Rab13    | Slc39a8   | Vamp1    |
| Avpr2    | Cthrc1     | Gfpt2  | Litaf        | Npdc1  | Rab22a   | Slc41a2   | Vkorc111 |
| B3gnt1l  | Ctnnbip1   | Gif    | Lix11        | Npr3   | Rab4a    | Slc43a1   | Vma21    |
| B4galt5  | Ctnnb11    | Gja1   | Lmf2         | Nptn   | Rab711   | Slc43a2   | Vps29    |
| B4galt6  | Ctps2      | Gja7   | LOC100360120 | Npy1r  | Rap1gap  | Slc9a3    | Wasl     |
| Bace2    | Ctsa       | Glb1l2 | LOC100360205 | Nr4a1  | Rapgef4  | Slco2b1   | Wbp2     |
| Basp1    | Ctsb       | Glrx1  | LOC100361444 | Nr4a2  | Rarres2  | Slco3a1   | Wbp5     |
| Basp1    | Ctsh       | Glt8d1 | LOC100362324 | Nr4a3  | Rasal2   | Smap      | Wdfy2    |
| Bat2d1   | Ctsz       | Gnai1  | LOC100362346 | Nsg1   | Rassf4   | Smarca1   | Wdr18    |
| Bckdhd   | Cttn       | Gnb1   | LOC100363005 | Nudt7  | Rbm3     | Smarce1   | Wdr37    |
| Bcl2l13  | Cul1       | Gnb2   | LOC100363014 | Nup37  | Rbms3    | Smoc2     | Xbp1     |
| Bicap    | Cyp11a1    | Gnb3   | LOC100363743 | Nxt1   | Rbmx     | Smpd2     | Xdh      |
| Blnk     | Cyp11b1    | Gnb5   | LOC100366017 | Ocl1   | Rbp7     | Smpd3     | Ykt6     |
| Bloc1s1  | Cyp4f5     | Gng11  | LOC100366259 | Odf3b  | Rcan2    | Snx8      | Zadh2    |
| Bnip2    | Dab1       | Golga3 | LOC24906     | Olah   | Rcn3     | Snx9      | Zbtb24   |
| Brd7     | Dapk1      | Golsyn | LOC296884    | Olfml3 | Rdh12    | Soat1     | Zdhhc20  |
| Bre      | Dbil5      | Gpam   | LOC304903    | Olr1   | Recql    | Sorbs2    | Zdhhc4   |
| Brms11   | Dcakd      | Gpc4   | LOC305633    | Omd    | Reep5    | Sox17     | Zfp180   |
| Brp441   | Ddc        | Gpld1  | LOC306766    | Orc51  | Rem1     | Sp1       | Zfp189   |

|           |         |         |           |        |            |        |         |
|-----------|---------|---------|-----------|--------|------------|--------|---------|
| Brsk1     | Ddr2    | Gpr116  | LOC363060 | Osbpl5 | Rft1       | Sparc  | Zfp398  |
| Btnl1     | Ddt     | Gprasp1 | LOC363331 | p18    | RGD1304595 | Spire1 | Zfp423  |
| Bub3      | Ddx19a  | Gpsm2   | LOC494529 | P4ha1  | RGD1307218 | Spire2 | Zfp426l |
| Bysl      | Dgkz    | Gpx7    | LOC500046 | Pank1  | RGD1307220 | Spns2  | Zfp469  |
| C1galt1c1 | Dlk1    | Grb10   | LOC501091 | Papss2 | RGD1307315 | Spop   | Zh16    |
| C6        | Dnajc12 | Grb14   | LOC502894 | Parg   | RGD1307396 | Spp1   | Zwilch  |
| Cabin1    | Dnajc30 | Gria3   |           |        |            |        |         |

---

**Table S4 Basic information of dynamic networks for the influenza H3N2 data (GSE30550)**

| GSE30550       | number of nodes |             | number of edges |             |
|----------------|-----------------|-------------|-----------------|-------------|
|                | asymptomatic    | symptomatic | asymptomatic    | symptomatic |
| <b>initial</b> | 2400            | 2400        | 16498           | 16498       |
| <b>0h</b>      | 2093            | 2120        | 8519            | 9143        |
| <b>5h</b>      | 2031            | 2139        | 7829            | 8932        |
| <b>12h</b>     | 2017            | 2095        | 7166            | 8173        |
| <b>21h</b>     | 2063            | 2132        | 7065            | 8749        |
| <b>29h</b>     | 2066            | 2096        | 7769            | 8504        |
| <b>36h</b>     | 1985            | 2161        | 6993            | 9325        |
| <b>45h</b>     | 1965            | 2147        | 7169            | 10017       |
| <b>53h</b>     | 2079            | 2183        | 7680            | 10498       |
| <b>60h</b>     | 2048            | 2150        | 7908            | 10363       |
| <b>69h</b>     | 2049            | 2047        | 6855            | 7995        |
| <b>77h</b>     | 2062            | 2107        | 7693            | 8743        |
| <b>84h</b>     | 2084            | 2080        | 7974            | 8661        |
| <b>93h</b>     | 2011            | 2087        | 7320            | 8507        |
| <b>101h</b>    | 1965            | 2042        | 7073            | 8264        |
| <b>108h</b>    | 2114            | 2152        | 7688            | 8445        |

**Table S5 Basic information of dynamic networks for the influenza H1N1 data (GSE52428)**

| GSE52428       | number of nodes |             | number of edges |             |
|----------------|-----------------|-------------|-----------------|-------------|
|                | asymptomatic    | symptomatic | asymptomatic    | symptomatic |
| <b>initial</b> | 2400            | 2400        | 16498           | 16498       |
| <b>0h</b>      | 2037            | 2060        | 7911            | 8541        |
| <b>5h</b>      | 1963            | 2019        | 6845            | 8113        |
| <b>12h</b>     | 1967            | 2004        | 6874            | 7967        |
| <b>21h</b>     | 1943            | 2025        | 7050            | 8436        |
| <b>29h</b>     | 2004            | 2041        | 7562            | 8687        |
| <b>36h</b>     | 1967            | 2094        | 7259            | 9677        |
| <b>45h</b>     | 1991            | 2138        | 7297            | 10453       |
| <b>53h</b>     | 1924            | 2172        | 6951            | 11409       |
| <b>60h</b>     | 1960            | 2191        | 7388            | 11404       |
| <b>69h</b>     | 2087            | 2083        | 8400            | 10119       |
| <b>77h</b>     | 2005            | 2176        | 7778            | 11138       |
| <b>84h</b>     | 2064            | 2082        | 7872            | 9877        |
| <b>93h</b>     | 2013            | 2035        | 7918            | 9289        |
| <b>101h</b>    | 1926            | 2022        | 6911            | 8474        |
| <b>108h</b>    | 2023            | 2117        | 7250            | 8829        |

**Table S6 Basic information of dynamic networks for the acute lung injury data (GSE2565)**

| GSE2565        | number of nodes |      | number of edges |      |
|----------------|-----------------|------|-----------------|------|
|                | control         | case | control         | case |
| <b>initial</b> | 770             | 770  | 5890            | 5890 |
| <b>0h</b>      | 640             | 640  | 4586            | 4624 |
| <b>0.5h</b>    | 640             | 638  | 4553            | 4586 |
| <b>1h</b>      | 641             | 637  | 4504            | 4561 |
| <b>8h</b>      | 638             | 639  | 4496            | 4521 |
| <b>12h</b>     | 638             | 639  | 4489            | 4502 |
| <b>24h</b>     | 640             | 636  | 4463            | 4492 |
| <b>48h</b>     | 634             | 636  | 4427            | 4443 |
| <b>72h</b>     | 637             | 639  | 4409            | 4433 |

**Table S7 Basic information of dynamic networks for the type 2 diabetes mellitus data (GSE13268)**

| GSE13268       | number of nodes |      | number of edges |      |
|----------------|-----------------|------|-----------------|------|
|                | control         | case | control         | case |
| <b>initial</b> | 755             | 755  | 4054            | 4054 |
| <b>4w</b>      | 624             | 623  | 2684            | 2799 |
| <b>8w</b>      | 619             | 621  | 2407            | 2505 |
| <b>12w</b>     | 624             | 625  | 2272            | 2366 |
| <b>16w</b>     | 621             | 623  | 2124            | 2268 |
| <b>20w</b>     | 620             | 624  | 2038            | 2176 |

**Table S8 Protein modules appearing in each time point in the asymptomatic networks for the influenza H3N2 data (GSE30550)**

| the proteins in module |           |        |        |        |         |       |         |         |
|------------------------|-----------|--------|--------|--------|---------|-------|---------|---------|
|                        | DDX58     | HERC5  | HERC6  | IFI27  | IFI35   | IFI44 | IFI44L  | IFI6    |
| <b>module 1</b>        | IFIH1     | IFIT1  | IFIT2  | IFIT3  | IRF7    | IRF9  | ISG15   | MX1     |
|                        | OAS1      | OAS2   | OAS3   | OASL   | RSAD2   | XAF1  | ...     |         |
| <b>module 2</b>        | CD19      | CD22   | CD72   | CD79A  | CD79B   | IGHM  | MS4A1   | POU2AF1 |
| <b>module 3</b>        | PDS5B     | RNGTT  | PDS5A  | STAG1  |         |       |         |         |
| <b>module 4</b>        | DIS3      | EXOSC2 | EXOSC8 | GTPBP1 | SKIV2L2 | ZFP36 | SUPV3L1 |         |
| <b>module 5</b>        | C14orf166 | DDX1   | RTCB   |        |         |       |         |         |
| <b>module 6</b>        | TIMM10    | TIMM22 | TIMM9  | TOMM20 | TOMM70A |       |         |         |

**Table S9 Protein modules appearing in each time point in the symptomatic networks for the influenza H3N2 data (GSE30550)**

|                 | the proteins in module |         |         |        |        |       |       |         |
|-----------------|------------------------|---------|---------|--------|--------|-------|-------|---------|
| <b>module 1</b> | ADAR                   | DDX58   | DDX60   | GBP1   | GBP2   | HERC6 | IFI27 | IFI35   |
|                 | IFI44                  | IFI44L  | IFI6    | IFIH1  | IFIT1  | IFIT2 | IFIT3 | IFIT5   |
|                 | IFITM1                 | IRF2    | IRF7    | IRF9   | ISG15  | ISG20 | MX1   | MX2     |
| <b>module 2</b> | OAS1                   | OAS2    | OAS3    | OASL   | RSAD2  | RTP4  | XAF1  | ...     |
|                 | CD19                   | CD22    | CD72    | CD79A  | CD79B  | IGHM  | MS4A1 | POU2AF1 |
| <b>module 3</b> | PDS5B                  | RNGTT   | PDS5A   | STAG1  |        |       |       |         |
| <b>module 4</b> | CDX4                   | NAP1L1  | NAP1L2  | NAP1L3 | NAP1L4 |       |       |         |
| <b>module 5</b> | AZI1                   | CEP192  | ALMS1   | CEP57  | CEP76  | OFD1  | PCNT  | SFI1    |
|                 | TUBGCP3                | TUBGCP4 | TUBGCP5 |        |        |       |       |         |

**Table S10 Protein modules appearing in each time point in the asymptomatic networks for the influenza H1N1 data (GSE52428)**

|                 | the proteins in module |       |       |       |       |       |        |       |
|-----------------|------------------------|-------|-------|-------|-------|-------|--------|-------|
| <b>module 1</b> | ADAR                   | DDX58 | GBP1  | GBP2  | HERC6 | IFI27 | IFI35  | IFI44 |
|                 | IFI44L                 | IFI6  | IFIH1 | IFIT1 | IFIT2 | IFIT3 | IFITM1 | IRF1  |
|                 | IRF2                   | IRF7  | IRF9  | ISG15 | ISG20 | MX1   | MX2    | OAS1  |
|                 | OAS2                   | OAS3  | OASL  | RSAD2 | RTP4  | XAF1  | ...    |       |
| <b>module 2</b> | PDS5B                  | PDS5A | RNGTT | STAG1 |       |       |        |       |

**Table S11 Protein modules appeared in each time point in symptomatic networks for influenza H1N1 data (GSE52428)**

|                 | the proteins in module |        |        |        |        |       |        |      |
|-----------------|------------------------|--------|--------|--------|--------|-------|--------|------|
| <b>module 1</b> | GBP1                   | GBP2   | ADAR   | IFI27  | IFI35  | IFI44 | IFI44L | IFI6 |
|                 | IFIH1                  | IFIT1  | IFIT2  | IFIT3  | IFITM1 | IRF1  | IRF2   | IRF7 |
|                 | IRF9                   | ISG15  | ISG20  | MX1    | MX2    | OAS1  | OAS2   | OAS3 |
|                 | OASL                   | RSAD2  | RTP4   | XAF1   | ...    |       |        |      |
| <b>module 2</b> | CDX4                   | NAP1L1 | NAP1L2 | NAP1L3 | NAP1L4 |       |        |      |

**Table S12 Protein modules appearing in each time point in the asymptomatic networks for the acute lung injury data (GSE2565)**

|                 | the proteins in module |         |              |          |        |         |        |        |
|-----------------|------------------------|---------|--------------|----------|--------|---------|--------|--------|
| <b>module 1</b> | Bnip3                  | Hk2     | Aldoa        | Ldha     | Pgd    | Pgk1    | Pkm2   | Slc2a1 |
|                 | Taldo1                 | Tkt     | Tpi1         | Arhgef12 | Pard6b | Prkei   | Rhoj   | Rhou   |
|                 | Gtf2f2                 | Pcf11   | Papolg       | Ptbp1    | U2af1  |         |        |        |
| <b>module 2</b> | Akr1b8                 | Aldh3a1 | Gclc         | Gclm     | Gpx2   | Gsr     | Gsta1  | Gsta2  |
|                 | Gsta3                  | Gsta4   | Loc100047868 | Mafk     | Nqo1   | Sult1a1 | Txnrd1 |        |
| <b>module 3</b> | Dnajc2                 | Dnajc21 | Eif1a        | Gnl3     | Kti12  | Nmd3    | Nsun4  | Rrs1   |
| <b>module 4</b> | Cldn3                  | Cldn4   | Cldn7        | Kcnk1    | Krt18  | Krt19   | Krt7   | Krt8   |

**Table S13 Protein modules appearing in each time point in the case networks for the acute lung injury data (GSE2565)**

|                 | the proteins in module |         |              |          |         |         |        |        |
|-----------------|------------------------|---------|--------------|----------|---------|---------|--------|--------|
| <b>module 1</b> | Bnip3                  | Hk2     | Aldoa        | Ldha     | Pgd     | Pgk1    | Pkm2   | Slc2a1 |
|                 | Taldo1                 | Tkt     | Tpi1         | Arhgef12 | Pard6b  | Prkci   | Rhoj   | Rhou   |
|                 | Gtf2f2                 | Pefl1   | Pap0lg       | Ptbp1    | U2af1   |         |        |        |
| <b>module 2</b> | Ensmusg00000050347     | Lgals1  | Lgals3       | Plp2     | S100a11 | Anxa8   | S100a6 |        |
| <b>module 3</b> | Akr1b8                 | Aldh3a1 | Gclc         | Gclm     | Gpx2    | Gsr     | Gsta1  | Gsta2  |
|                 | Gsta3                  | Gsta4   | Loc100047868 | Mafk     | Nqo1    | Sult1a1 | Txnrd1 |        |
| <b>module 4</b> | Actn1                  | Acta1   | Spnb2        | Tnc      | Tpm2    |         |        |        |

**Table S14 Protein modules appearing in each time point in the control networks for the type 2 diabetes mellitus data (GSE13268)**

|                 | the proteins in module |         |         |        |         |         |         |       |
|-----------------|------------------------|---------|---------|--------|---------|---------|---------|-------|
| <b>module 1</b> | Akr1b7                 | Fmo1    | Glrx1   | Gpx7   | Gss     | Gsta3   | Gstm2   | Gstm5 |
|                 | Gstm7                  | Gsto1   | Gsto2   | Gstp1  | Gstt1   | Gstt2   | Me1     | Mgst2 |
|                 | Prdx3                  | Sult1a1 | Xdh     | Ankrd6 | Frzb    | Fzd1    | Acpl2   | Lef1  |
|                 | Nkd1                   | Nlk     | Sox17   | C6     | Ermp1   | Ppap2c  | Sgms1   | Smpd2 |
|                 | Smpd3                  | Cyp11a1 | Cyp11b1 | Fdx11  | Hsd11b2 | Tmem50b |         |       |
| <b>module 2</b> | Adcy4                  | Anxa1   | Ccl9    | Cnr1   | Ednrb   | Gcgr    | Geft    | Gnai1 |
|                 | Gnb2                   | Gnb3    | Gng11   | Hcrtr2 | Npy1r   | Pik3r3  | Plcb1   | Tac1  |
| <b>module 3</b> | Acox1                  | Acot2   | Acsf2   | Acsl4  | Acsl5   | Adfp    | Angptl4 | Fabp5 |
|                 | Lyplal1                | Mgl1    | Plin    | Pnpla3 | Scd1    |         |         |       |

**Table S15 Protein modules appearing in each time point in the case networks for the type 2 diabetes mellitus data (GSE13268)**

|                 | the proteins in module |         |         |        |           |         |       |        |
|-----------------|------------------------|---------|---------|--------|-----------|---------|-------|--------|
| <b>module 1</b> | Akr1b7                 | Fmo1    | Glrx1   | Gpx7   | Gss       | Gsta3   | Gstm2 | Gstm5  |
|                 | Gstm7                  | Gsto1   | Gsto2   | Gstp1  | Gstt1     | Gstt2   | Me1   | Mgst2  |
|                 | Prdx3                  | Sult1a1 | Xdh     | Ankrd6 | Frzb      | Fzd1    | Acpl2 | Lef1   |
|                 | Nkd1                   | Nlk     | Sox17   | C6     | Ermp1     | Ppap2c  | Sgms1 | Smpd2  |
|                 | Smpd3                  | Cyp11a1 | Cyp11b1 | Fdx11  | Hsd11b2   | Tmem50b |       |        |
| <b>module 2</b> | Adcy4                  | Anxa1   | Ccl9    | Cnr1   | Ednrb     | Gcgr    | Geft  | Gnai1  |
|                 | Gnb2                   | Gnb3    | Gng11   | Hcrtr2 | Npy1r     | Pik3r3  | Plcb1 | Tac1   |
| <b>module 3</b> | Agpat4                 | Dgkz    | Chpt1   | Etnk2  | Gpam      | Gpld1   | Pld1  | Pld2   |
|                 | Ppap2c                 |         |         |        |           |         |       |        |
| <b>module 4</b> | Apex1                  | Ctnnb11 | Ddx19a  | Erh    | Ftsj3     | Hspe1   | Ltv1  | Mrpl21 |
|                 | Mrpl32                 | Mt1a    | Nup37   | Nxt1   | Polr1c    | Psm4    | Psm6  | Ttc27  |
|                 | Utp15                  | Utp3    | Wdr18   |        |           |         |       |        |
| <b>module 5</b> | Adamts15               | Cela1   | Fmo2    | Pmm1   | Serpina12 |         |       |        |



**Table S16 All protein modules appearing in each time point in both the asymptomatic and symptomatic networks for the influenza H3N2 data (GSE30550)**

|                                 | the proteins in module |       |       |       |       |       |        |         |
|---------------------------------|------------------------|-------|-------|-------|-------|-------|--------|---------|
| <b>module 1</b><br><b>(HM1)</b> | DDX58                  | HERC5 | HERC6 | IFI27 | IFI35 | IFI44 | IFI44L | IFI6    |
|                                 | IFIH1                  | IFIT1 | IFIT2 | IFIT3 | IRF7  | IRF9  | ISG15  | MX1     |
|                                 | OAS1                   | OAS2  | OAS3  | OASL  | RSAD2 | XAF1  | ...    |         |
| <b>module 2</b>                 | CD19                   | CD22  | CD72  | CD79A | CD79B | IGHM  | MS4A1  | POU2AF1 |
| <b>module 3</b>                 | PDS5B                  | RNGTT | PDS5A | STAG1 |       |       |        |         |

**Table S17 All protein modules appearing in each time point in both the asymptomatic and symptomatic networks for the influenza H1N1 data (GSE52428)**

|                                 | the proteins in module |       |       |       |       |       |        |       |
|---------------------------------|------------------------|-------|-------|-------|-------|-------|--------|-------|
| <b>module 1</b><br><b>(HM2)</b> | ADAR                   | DDX58 | GBP1  | GBP2  | HERC6 | IFI27 | IFI35  | IFI44 |
|                                 | IFI44L                 | IFI6  | IFIH1 | IFIT1 | IFIT2 | IFIT3 | IFITM1 | IRF1  |
|                                 | IRF2                   | IRF7  | IRF9  | ISG15 | ISG20 | MX1   | MX2    | OAS1  |
|                                 | OAS2                   | OAS3  | OASL  | RSAD2 | RTP4  | XAF1  |        |       |

**Table S18 All protein modules appearing in each time point in both the asymptomatic and symptomatic networks for the acute lung injury data (GSE2565)**

|                                 | the proteins in module |         |              |          |        |         |        |        |
|---------------------------------|------------------------|---------|--------------|----------|--------|---------|--------|--------|
| <b>module 1</b><br><b>(HM3)</b> | Bnip3                  | Hk2     | Aldoa        | Ldha     | Pgd    | Pgk1    | Pkm2   | Slc2a1 |
|                                 | Taldo1                 | Tkt     | Tpi1         | Arhgef12 | Pard6b | Prkci   | Rhoj   | Rhou   |
|                                 | Gtf2f2                 | Pcf11   | Papolg       | Ptbp1    | U2af1  |         |        |        |
| <b>module 2</b>                 | Akr1b8                 | Aldh3a1 | Gclc         | Gclm     | Gpx2   | Gsr     | Gsta1  | Gsta2  |
|                                 | Gsta3                  | Gsta4   | Loc100047868 | Mafk     | Nqo1   | Sult1a1 | Txnrd1 |        |

**Table S19 All protein modules appearing in each time point in both the asymptomatic and symptomatic networks for the type 2 diabetes mellitus data (GSE13268)**

|                                 | the proteins in module |         |         |        |         |         |       |       |
|---------------------------------|------------------------|---------|---------|--------|---------|---------|-------|-------|
| <b>module 1</b><br><b>(HM4)</b> | Akr1b7                 | Fmo1    | Glx1    | Gpx7   | Gss     | Gsta3   | Gstm2 | Gstm5 |
|                                 | Gstm7                  | Gsto1   | Gsto2   | Gstp1  | Gstt1   | Gstt2   | Me1   | Mgst2 |
|                                 | Prdx3                  | Sult1a1 | Xdh     | Ankrd6 | Frzb    | Fzd1    | Acpl2 | Lef1  |
|                                 | Nkd1                   | Nlk     | Sox17   | C6     | Ermp1   | Ppap2c  | Sgms1 | Smpd2 |
|                                 | Smpd3                  | Cyp11a1 | Cyp11b1 | Fdx11  | Hsd11b2 | Tmem50b |       |       |
| <b>module 2</b>                 | Adcy4                  | Anxa1   | Ccl9    | Cnr1   | Ednrb   | Gcgr    | Geft  | Gnai1 |
|                                 | Gnb2                   | Gnb3    | Gng11   | Hcrtr2 | Npy1r   | Pik3r3  | Plcb1 | Tac1  |

**Table S20 Descriptions of the HM1 of the influenza H3N2 data (GSE30550)**

| <b>Symbol</b> | <b>Descriptions</b>                                                                |
|---------------|------------------------------------------------------------------------------------|
| IFIH1         | interferon induced with helicase C domain 1                                        |
| HERC6         | hect domain and RLD 6                                                              |
| OAS3          | 2'-5'-oligoadenylate synthetase 3, 100kDa                                          |
| HERC5         | hect domain and RLD 5                                                              |
| RSAD2         | radical S-adenosyl methionine domain containing 2                                  |
| IFI44L        | interferon-induced protein 44-like                                                 |
| IFI44         | interferon-induced protein 44                                                      |
| OAS1          | 2',5'-oligoadenylate synthetase 1, 40/46kDa                                        |
| OAS2          | 2'-5'-oligoadenylate synthetase 2, 69/71kDa                                        |
| IFI35         | interferon-induced protein 35                                                      |
| DDX58         | DEAD (Asp-Glu-Ala-Asp) box polypeptide 58                                          |
| IFIT3         | interferon-induced protein with tetratricopeptide repeats 3                        |
| IRF9          | interferon regulatory factor 9                                                     |
| IFIT2         | interferon-induced protein with tetratricopeptide repeats 2                        |
| IFIT1         | interferon-induced protein with tetratricopeptide repeats 1                        |
| IFI27         | interferon, alpha-inducible protein 27                                             |
| OASL          | 2'-5'-oligoadenylate synthetase-like                                               |
| ISG15         | ISG15 ubiquitin-like modifier                                                      |
| IRF7          | interferon regulatory factor 7                                                     |
| XAF1          | XIAP associated factor 1                                                           |
| MX1           | myxovirus (influenza virus) resistance 1, interferon-inducible protein p78 (mouse) |
| IFI6          | interferon, alpha-inducible protein 6                                              |

**Table S21 Descriptions of the HM2 of the influenza H1N1 data (GSE52428)**

| <b>Symbol</b> | <b>Descriptions</b>                                                                |
|---------------|------------------------------------------------------------------------------------|
| IFIH1         | interferon induced with helicase C domain 1                                        |
| RTP4          | receptor (chemosensory) transporter protein 4                                      |
| IFITM1        | interferon induced transmembrane protein 1 (9-27)                                  |
| OAS3          | 2'-5'-oligoadenylate synthetase 3, 100kDa                                          |
| RSAD2         | radical S-adenosyl methionine domain containing 2                                  |
| IFI44L        | interferon-induced protein 44-like                                                 |
| OAS1          | 2',5'-oligoadenylate synthetase 1, 40/46kDa                                        |
| OAS2          | 2'-5'-oligoadenylate synthetase 2, 69/71kDa                                        |
| IFI35         | interferon-induced protein 35                                                      |
| ISG20         | interferon stimulated exonuclease gene 20kDa                                       |
| ISG15         | ISG15 ubiquitin-like modifier                                                      |
| XAF1          | XIAP associated factor 1                                                           |
| MX1           | myxovirus (influenza virus) resistance 1, interferon-inducible protein p78 (mouse) |
| MX2           | myxovirus (influenza virus) resistance 2 (mouse)                                   |
| HERC6         | hect domain and RLD 6                                                              |
| IFI44         | interferon-induced protein 44                                                      |
| DDX58         | DEAD (Asp-Glu-Ala-Asp) box polypeptide 58                                          |
| IRF9          | interferon regulatory factor 9                                                     |
| IFIT3         | interferon-induced protein with tetratricopeptide repeats 3                        |
| IFIT2         | interferon-induced protein with tetratricopeptide repeats 2                        |
| OASL          | 2'-5'-oligoadenylate synthetase-like                                               |
| IFI27         | interferon, alpha-inducible protein 27                                             |
| IFIT1         | interferon-induced protein with tetratricopeptide repeats 1                        |
| IRF7          | interferon regulatory factor 7                                                     |
| IRF1          | interferon regulatory factor 1                                                     |
| IRF2          | interferon regulatory factor 2                                                     |
| IFI6          | interferon, alpha-inducible protein 6                                              |
| GBP2          | guanylate binding protein 2, interferon-inducible                                  |
| ADAR          | adenosine deaminase, RNA-specific                                                  |
| GBP1          | guanylate binding protein 1, interferon-inducible, 67kDa                           |

**Table S22 Descriptions of the HM3 of the acute lung injury data (GSE2565)**

| <b>Symbol</b> | <b>Descriptions</b>                                                                                                                        |
|---------------|--------------------------------------------------------------------------------------------------------------------------------------------|
| Rhoj          | ras homolog gene family, member J                                                                                                          |
| Pkm2          | predicted gene 6560; predicted gene 2124; predicted gene 6992; pyruvate kinase,muscle;similar to M2-type pyruvate kinase                   |
| U2af1         | predicted gene 10232; predicted gene 6978; U2 small nuclear ribonucleoprotein auxiliary factor (U2AF) 1                                    |
| Ptbp1         | polypyrimidine tract binding protein 1; predicted gene 4900                                                                                |
| Pgk1          | phosphoglycerate kinase 1; predicted gene, EG668435                                                                                        |
| Rhou          | ras homolog gene family, member U                                                                                                          |
| Arhgef12      | predicted gene 7281; predicted gene 5831; similar to SP140 nuclear body exchange factor (GEF) 12 protein (predicted);Rhoguanine nucleotide |
| Tkt           | transketolase                                                                                                                              |
| Tpi1          | triosephosphate isomerase 1; similar to triosephosphate isomerase 1                                                                        |
| Gtf2f2        | general transcription factor IIF, polypeptide 2                                                                                            |
| Pard6b        | par-6 (partitioning defective 6) homolog beta (C. elegans)                                                                                 |
| Pcf11         | cleavage and polyadenylation factor subunit homolog (S. cerevisiae)                                                                        |
| Aldoa         | aldolase A, fructose-bisphosphate; predicted gene 8767; predicted gene 7556                                                                |
| Taldo1        | transaldolase 1                                                                                                                            |
| Prkci         | protein kinase C, iota                                                                                                                     |
| Ldha          | predicted gene 7997; lactate dehydrogenase A; predicted gene 5452                                                                          |
| Bnip3         | predicted gene 14506; BCL2/adenovirus E1B interacting protein 3; predicted gene 6532; similar to E1B 19K/B cl-2-binding protein homolog    |
| Slc2a1        | solute carrier family 2 (facilitated glucose transporter), member 1                                                                        |
| Pap0lg        | poly(A) polymerase gamma                                                                                                                   |
| Hk2           | hexokinase 2                                                                                                                               |
| Pgd           | phosphogluconate dehydrogenase                                                                                                             |

**Table S23 Descriptions of the HM4 of the type 2 diabetes mellitus data (GSE13268)**

| Symbol  | Descriptions                                                                                    |
|---------|-------------------------------------------------------------------------------------------------|
| Fmo1    | flavin containing monooxygenase 1                                                               |
| C6      | complement component 6                                                                          |
| Fdx11   | ferredoxin 1-like                                                                               |
| Xdh     | xanthine dehydrogenase                                                                          |
| Gss     | glutathione synthetase                                                                          |
| Gstp1   | glutathione-S-transferase, pi 1                                                                 |
| Tmem50b | transmembrane protein 50B                                                                       |
| Sgms1   | sphingomyelin synthase 1                                                                        |
| Gsta3   | glutathione S-transferase A3                                                                    |
| Nkd1    | naked cuticle homolog 1 (Drosophila)                                                            |
| Mgst2   | microsomal glutathione S-transferase 2                                                          |
| Sox17   | SRY (sex determining region Y)-box 17                                                           |
| Gpx7    | glutathione peroxidase 7                                                                        |
| Cyp11b1 | cytochrome P450, subfamily 11B, polypeptide 1                                                   |
| Gstt1   | glutathione S-transferase theta 1                                                               |
| Gstt2   | glutathione S-transferase, theta 2                                                              |
| Prdx3   | peroxiredoxin 3                                                                                 |
| Lef1    | lymphoid enhancer binding factor 1                                                              |
| Nlk     | nemo like kinase                                                                                |
| Frzb    | frizzled-related protein                                                                        |
| Gstm2   | glutathione S-transferase mu 2                                                                  |
| Ankrd6  | ankyrin repeat domain 6                                                                         |
| Ppap2c  | phosphatidic acid phosphatase type 2c                                                           |
| Smpd3   | sphingomyelin phosphodiesterase 3, neutral                                                      |
| Smpd2   | sphingomyelin phosphodiesterase 2, neutral                                                      |
| Me1     | malic enzyme 1, NADP(+)-dependent, cytosolic                                                    |
| Fzd1    | frizzled homolog 1 (Drosophila)                                                                 |
| Akr1b7  | aldo-keto reductase family 1, member B7                                                         |
| Gsto2   | glutathione S-transferase omega 2                                                               |
| Gsto1   | glutathione S-transferase omega 1                                                               |
| Acpl2   | acid phosphatase-like 2                                                                         |
| Ermp1   | endoplasmic reticulum metalloproteinase 1                                                       |
| Hsd11b2 | hydroxysteroid 11-beta dehydrogenase 2                                                          |
| Cyp11a1 | cytochrome P450, family 11, subfamily a, polypeptide 1                                          |
| Glrx1   | glutaredoxin 1 (thioltransferase)                                                               |
| Sult1a1 | sulfotransferase family, cytosolic, 1A, phenol-preferring, member 1                             |
| Gstm5   | glutathione S-transferase, mu 5                                                                 |
| Gstm7   | glutathione S-transferase mu 3; glutathione S-transferase mu 4; glutathione S-transferase, mu 7 |

**Table S24 Functional enrichment of GO biological processes in the identified DNB of the influenza H3N2 data (GSE30550)**

| Genes in DNB                                                                        | GO Term    | Description                 | P-Value  |
|-------------------------------------------------------------------------------------|------------|-----------------------------|----------|
| {DDX58,IRF9,IFIH1,ISG15,IRF7,RSAD2,IFI44,MX1,IFI35}                                 | GO:0009615 | response to virus           | 2.23E-13 |
| {DDX58,IRF9,IFIH1,ISG15,IRF7,RSAD2,IFI44,MX1,IFI35}                                 | GO:0051707 | response to other organism  | 5.97E-10 |
| {DDX58,IRF9,IFIH1,ISG15,IRF7,RSAD2,IFI44,MX1,IFI35}                                 | GO:0009607 | response to biotic stimulus | 5.47E-09 |
| {DDX58,IFIH1,OASL,OAS3,RSAD2,IFI44L,OAS1,OAS2,IFI6,IFI35}                           | GO:0006955 | immune response             | 2.58E-08 |
| {DDX58,IRF9,IFIH1,ISG15,IRF7,RSAD2,IFI44,MX1,IFI35}                                 | GO:0051704 | multi-organism process      | 4.65E-07 |
| {DDX58,IFIH1,OASL,OAS3,RSAD2,IFI44L,OAS1,OAS2,IFI6,IFI35}                           | GO:0002376 | immune system process       | 6.17E-07 |
| {IFIH1,OAS3,RSAD2,IFI44L,IFI44,OAS1,OAS2,IFI35,DDX58,IRF9,OASL,ISG15,IRF7,MX1,IFI6} | GO:0050896 | response to stimulus        | 1.02E-06 |

**Table S25 Functional enrichment of GO biological processes in the identified DNB of the influenza H1N1 data (GSE52428)**

| Genes in DNB                                                                                                         | GO Term    | Description                | P-Value  |
|----------------------------------------------------------------------------------------------------------------------|------------|----------------------------|----------|
| {DDX58,IRF9,IFIH1,ISG15,IRF7,RSAD2,IFI44,MX1,MX2,IFI35,ISG20}                                                        | GO:0009615 | response to virus          | 1.45E-15 |
| {DDX58,IRF9,IFIH1,IFITM1,ISG15,IRF7,RSAD2,IFI44, MX1,MX2,IFI35,ISG20}                                                | GO:0009607 | response to bioticstimulus | 1.66E-11 |
| {DDX58,IRF9,IFIH1,ISG15,IRF7,RSAD2,IFI44,MX1,MX2,IFI35,ISG20}                                                        | GO:0051707 | response to other organism | 2.86E-11 |
| {DDX58,IFIH1,OASL,OAS3,RSAD2,IFI44L,OAS1,OAS2, GBP2,IFI6,IFI35,GBP1}                                                 | GO:0006955 | immune response            | 8.37E-09 |
| {IFIH1,RTP4,IFITM1,OAS3,RSAD2,IFI44L,IFI44,OAS1, OAS2,IFI35,ISG20,DDX58,IRF9,OASL,ISG15,IRF7,MX1,MX2,IFI6,GBP2,GBP1} | GO:0050896 | response to stimulus       | 1.04E-08 |
| {IFIH1,OAS3,RSAD2,IFI44L,OAS1,OAS2,IFI35,DDX58, OASL,IRF1,GBP2,IFI6, GBP1}                                           | GO:0002376 | immune system process      | 3.21E-08 |
| {DDX58,IRF9,IFIH1,ISG15,IRF7,RSAD2,IFI44,MX1,MX2,IFI35,ISG20}                                                        | GO:0051704 | multi-organism process     | 1.08E-07 |

**Table S26 Functional enrichment of GO biological processes in the identified DNB of the acute lung injury data (GSE2565)**

| Genes in DNB                                   | GO Term    | Description                                    | P-Value  |
|------------------------------------------------|------------|------------------------------------------------|----------|
| {ALDOA,TPI1,LDHA,TALDO1,PKM2,PGD,HK2,TKT,PGK1} | GO:0006007 | glucose catabolic process                      | 6.14E-15 |
| {ALDOA,TPI1,LDHA,TALDO1,PKM2,PGD,HK2,TKT,PGK1} | GO:0046365 | monosaccharide catabolic process               | 8.22E-15 |
| {ALDOA,TPI1,LDHA,TALDO1,PKM2,PGD,HK2,TKT,PGK1} | GO:0019320 | hexose catabolic process                       | 8.22E-15 |
| {ALDOA,TPI1,LDHA,TALDO1,PKM2,PGD,HK2,TKT,PGK1} | GO:0046164 | alcohol catabolic process                      | 4.41E-14 |
| {ALDOA,TPI1,LDHA,TALDO1,PKM2,PGD,HK2,TKT,PGK1} | GO:0044275 | cellular carbohydrate catabolic process        | 4.41E-14 |
| {ALDOA,TPI1,LDHA,TALDO1,PKM2,PGD,HK2,TKT,PGK1} | GO:0016052 | carbohydrate catabolic process                 | 5.70E-13 |
| {ALDOA,TPI1,LDHA,TALDO1,PKM2,PGD,HK2,TKT,PGK1} | GO:0006006 | glucose metabolic process                      | 6.64E-11 |
| {ALDOA,TPI1,LDHA,TALDO1,PKM2,PGD,HK2,TKT,PGK1} | GO:0019318 | hexose metabolic process                       | 2.08E-10 |
| {ALDOA,TPI1,LDHA,TALDO1,PKM2,PGD,HK2,TKT,PGK1} | GO:0005996 | monosaccharide metabolic process               | 5.64E-10 |
| {ALDOA,TPI1,LDHA,PKM2,HK2,PGK1}                | GO:0006096 | glycolysis                                     | 4.69E-09 |
| {TPI1,LDHA,TALDO1,PGD,TKT}                     | GO:0046496 | nicotinamide nucleotide metabolic process      | 3.36E-07 |
| {TPI1,LDHA,TALDO1,PGD,TKT}                     | GO:0006769 | nicotinamide metabolic process                 | 3.71E-07 |
| {TPI1,LDHA,TALDO1,PGD,TKT}                     | GO:0019362 | pyridine nucleotide metabolic process          | 4.09E-07 |
| {TPI1,LDHA,TALDO1,PGD,TKT}                     | GO:0009820 | alkaloid metabolic process                     | 4.09E-07 |
| {TPI1,TALDO1,PGD,TKT}                          | GO:0006098 | pentose-phosphate shunt                        | 4.54E-07 |
| {TPI1,LDHA,TALDO1,PGD,TKT}                     | GO:0006733 | oxidoreduction coenzyme metabolic process      | 8.90E-07 |
| {TPI1,TALDO1,PGD,TKT}                          | GO:0006739 | NADP metabolic process                         | 1.25E-06 |
| {TPI1,LDHA,TALDO1,PGD,TKT}                     | GO:0043603 | cellular amide metabolic process               | 1.29E-06 |
| {TPI1,LDHA,TALDO1,PGD,TKT}                     | GO:0019748 | secondary metabolic process                    | 8.47E-06 |
| {TPI1,PGD,TKT,PGK1}                            | GO:0046364 | monosaccharide biosynthetic process            | 1.76E-05 |
| {ALDOA,TPI1,LDHA,PKM2,HK2,PGK1}                | GO:0006091 | generation of precursor metabolites and energy | 1.97E-05 |
| {TPI1,LDHA,PKM2,PGK1}                          | GO:0006090 | pyruvate metabolic process                     | 3.53E-05 |
| {TPI1,PGD,TKT,PGK1}                            | GO:0046165 | alcohol biosynthetic process                   | 3.53E-05 |
| {TPI1,LDHA,TALDO1,PGD,TKT}                     | GO:0006732 | coenzyme metabolic process                     | 7.82E-05 |
| {TPI1,PGD,TKT,PGK1}                            | GO:0034637 | cellular carbohydrate biosynthetic process     | 1.14E-04 |
| {TALDO1,PGD,TKT}                               | GO:0019321 | pentose metabolic process                      | 1.88E-04 |
| {TPI1,LDHA,TALDO1,PGD,TKT}                     | GO:0051186 | cofactor metabolic process                     | 1.93E-04 |
| {TPI1,PGD,TKT,PGK1}                            | GO:0016051 | carbohydrate biosynthetic process              | 3.63E-04 |

**Table S27 Functional enrichment of GO biological processes in the identified DNB of the type 2 diabetes mellitus data (GSE13268)**

| Genes in DNB                                                                                                                                                    | GO Term    | Description                                      | P-Value  |
|-----------------------------------------------------------------------------------------------------------------------------------------------------------------|------------|--------------------------------------------------|----------|
| {GSTM2,GSTA3,SULT1A1,GSTP1,GSTM7}                                                                                                                               | GO:0006805 | xenobiotic metabolic process                     | 2.63E-07 |
| {GSTM2,GSTA3,SULT1A1,GSTP1,GSTM7}                                                                                                                               | GO:0009410 | response to xenobiotic stimulus                  | 4.32E-07 |
| {GSS,GSTA3,GSTT1,GSTT2,GSTP1}                                                                                                                                   | GO:0006749 | glutathione metabolic process                    | 5.82E-07 |
| {ME1,XDH,ERMP1,CYP11B1,C6,SGMS1,PRDX3,GSTM5,GLRX1,GSTM7,GSS,GSTM2,FMO1,SULT1A1,GSTO2,GSTO1,GSTA3,CYP11A1,NLK,LEF1,GSTT1,GSTT2,AKR1B7,HSD11B2,SMPD3,GSTP1,SMPD2} | GO:0008152 | metabolic process                                | 2.47E-06 |
| {GSS,GSTA3,SULT1A1,GSTT1,GSTT2,GSTP1}                                                                                                                           | GO:0006790 | sulfur metabolic process                         | 5.40E-06 |
| {GSS,GSTA3,GSTT1,GSTT2,GSTP1}                                                                                                                                   | GO:0006518 | peptide metabolic process                        | 5.91E-06 |
| {GSS,GSTA3,SULT1A1,GSTT1,GSTT2,GSTP1}                                                                                                                           | GO:0006575 | cellular amino acid derivative metabolic process | 4.21E-05 |
| {ME1,XDH,AKR1B7,CYP11A1,FMO1,CYP11B1,HSD11B2,PRDX3,GLRX1}                                                                                                       | GO:0055114 | oxidation reduction                              | 6.44E-05 |
| {ME1,GSTM2,CYP11A1,SULT1A1,HSD11B2,LEF1,GSTT1,PRDX3,GSTM7, MGST2}                                                                                               | GO:0010033 | response to organic substance                    | 2.05E-04 |
| {CYP11A1,CYP11B1,SULT1A1,HSD11B2}                                                                                                                               | GO:0034754 | cellular hormone metabolic process               | 4.32E-04 |
| {CYP11A1,CYP11B1,SULT1A1,HSD11B2,SMPD3}                                                                                                                         | GO:0010817 | regulation of hormone levels                     | 4.84E-04 |
| {GSS,GSTA3,GSTT1,GSTT2,GSTP1}                                                                                                                                   | GO:0006732 | coenzyme metabolic process                       | 5.20E-04 |



**Table S28 Pearson correlation coefficient (PCC) between the expression values of S1PR1 and those proteins of interest in the innate immunity pathways in 9 symptomatic subjects infected by the H3N2 influenza virus strain**

|                | Symptomatic (Sx) subjects |        |        |        |        |        |        |        |        |
|----------------|---------------------------|--------|--------|--------|--------|--------|--------|--------|--------|
|                | 1                         | 5      | 6      | 7      | 8      | 10     | 12     | 13     | 15     |
| <b>MDA5</b>    | -0.378                    | -0.786 | -0.545 | -0.735 | -0.79  | -0.686 | -0.535 | -0.523 | -0.643 |
| MAPK           | -0.101                    | 0.112  | 0.019  | -0.024 | -0.077 | 0.59   | 0.481  | 0.705  | 0.318  |
| <b>HERC6</b>   | 0.015                     | -0.806 | -0.622 | -0.766 | -0.746 | -0.648 | -0.377 | -0.558 | -0.534 |
| <b>HERC5</b>   | -0.344                    | -0.819 | -0.607 | -0.781 | -0.852 | -0.701 | -0.646 | -0.654 | -0.618 |
| <b>RIG-I</b>   | -0.43                     | -0.807 | -0.508 | -0.721 | -0.788 | -0.727 | -0.657 | -0.569 | -0.629 |
| <b>IFI44L</b>  | -0.045                    | -0.794 | -0.619 | -0.749 | -0.837 | -0.671 | -0.442 | -0.61  | -0.561 |
| <b>OAS2</b>    | -0.121                    | -0.805 | -0.719 | -0.806 | -0.809 | -0.675 | -0.563 | -0.66  | -0.606 |
| <b>RSAD2</b>   | -0.186                    | -0.801 | -0.603 | -0.772 | -0.824 | -0.706 | -0.556 | -0.646 | -0.665 |
| <b>IRF7</b>    | -0.207                    | -0.844 | -0.734 | -0.781 | -0.803 | -0.689 | -0.489 | -0.653 | -0.522 |
| <b>IFIT3</b>   | -0.271                    | -0.839 | -0.616 | -0.785 | -0.865 | -0.719 | -0.576 | -0.653 | -0.626 |
| <b>OAS1</b>    | -0.112                    | -0.787 | -0.653 | -0.795 | -0.824 | -0.678 | -0.522 | -0.617 | -0.579 |
| <b>OAS3</b>    | -0.222                    | -0.816 | -0.732 | -0.782 | -0.817 | -0.694 | -0.544 | -0.673 | -0.58  |
| <b>IFI35</b>   | -0.38                     | -0.843 | -0.772 | -0.787 | -0.763 | -0.707 | -0.665 | -0.657 | -0.592 |
| <b>IFI6</b>    | -0.133                    | -0.789 | -0.835 | -0.798 | -0.782 | -0.69  | -0.63  | -0.678 | -0.566 |
| <b>IFI44</b>   | -0.084                    | -0.767 | -0.627 | -0.697 | -0.803 | -0.666 | -0.463 | -0.547 | -0.574 |
| <b>MX1</b>     | -0.296                    | -0.831 | -0.745 | -0.772 | -0.841 | -0.696 | -0.582 | -0.7   | -0.604 |
| <b>IFIT1</b>   | -0.264                    | -0.803 | -0.558 | -0.764 | -0.839 | -0.694 | -0.599 | -0.64  | -0.684 |
| <b>XAF1</b>    | -0.127                    | -0.715 | -0.559 | -0.745 | -0.812 | -0.697 | -0.45  | -0.467 | -0.528 |
| TLR3           | 0.465                     | -0.433 | 0.094  | -0.052 | -0.352 | -0.371 | -0.526 | -0.261 | -0.427 |
| TBK1           | -0.322                    | -0.162 | -0.35  | -0.104 | -0.594 | -0.452 | 0.142  | 0.116  | -0.022 |
| <b>ISG15</b>   | -0.084                    | -0.801 | -0.658 | -0.776 | -0.795 | -0.713 | -0.451 | -0.655 | -0.634 |
| IKK $\beta$    | 0.763                     | 0.662  | 0.187  | 0.709  | 0.751  | 0.663  | 0.943  | 0.939  | 0.836  |
| <b>IFIT2</b>   | -0.541                    | -0.838 | -0.516 | -0.768 | -0.809 | -0.724 | -0.696 | -0.605 | -0.66  |
| MyD88          | -0.159                    | -0.841 | -0.593 | -0.743 | -0.798 | -0.7   | -0.371 | -0.35  | -0.289 |
| <b>OASL</b>    | -0.271                    | -0.85  | -0.628 | -0.823 | -0.842 | -0.722 | -0.623 | -0.695 | -0.665 |
| IRF3           | 0.413                     | 0.071  | 0.026  | 0.448  | 0.698  | 0.699  | 0.315  | 0.669  | 0.837  |
| <b>IRF9</b>    | -0.329                    | -0.84  | -0.495 | -0.765 | -0.866 | -0.664 | -0.194 | -0.603 | -0.417 |
| TNF- $\alpha$  | 0.425                     | -0.646 | -0.58  | -0.492 | -0.793 | -0.218 | -0.101 | -0.202 | 0.125  |
| IL6            | -0.086                    | -0.494 | -0.357 | -0.231 | 0.089  | 0.192  | -0.601 | 0.123  | -0.469 |
| IKK $\alpha$   | 0.162                     | 0.342  | 0.313  | 0.16   | -0.452 | -0.165 | 0.602  | 0.736  | 0.389  |
| NF $\kappa$ B  | 0.339                     | -0.202 | -0.326 | 0.347  | -0.2   | 0.166  | 0.66   | 0.257  | 0.702  |
| <b>IFI27</b>   | 0.566                     | -0.646 | -0.388 | -0.617 | -0.662 | -0.395 | -0.125 | -0.372 | -0.283 |
| IFN- $\gamma$  | 0.209                     | -0.216 | 0.15   | 0.234  | 0.02   | -0.543 | -0.64  | -0.473 | -0.185 |
| IFN- $\alpha$  | -0.03                     | -0.512 | -0.212 | -0.777 | 0.22   | -0.175 | 0.01   | -0.56  | -0.572 |
| IKK $\epsilon$ | 0.85                      | -0.316 | -0.231 | 0.179  | 0.196  | 0.29   | -0.286 | -0.029 | 0.377  |
| IFN- $\beta$   | 0.075                     | -0.427 | -0.239 | -0.033 | -0.135 | -0.23  | -0.697 | -0.734 | -0.345 |

Note: The identified DNBs are marked in red and bold. Proteins with significant differences of correlations between the symptomatic and asymptomatic subjects are labeled in green background. The results indicate that most of the DNBs exhibit significant differences in the distributions of correlations between the two different clinical outcomes (marked in red and green background).

**Table S29 Pearson correlation coefficient (PCC) between the expression values of S1PR1 and those proteins of interest in the innate immunity pathways in 8 asymptomatic subjects infected by the H3N2 influenza virus strain**

|                | Asymptomatic (Asx) subjects |        |        |        |        |        |        |        |          |
|----------------|-----------------------------|--------|--------|--------|--------|--------|--------|--------|----------|
|                | 2                           | 3      | 4      | 9      | 11     | 14     | 16     | 17     | P-value  |
| <b>MDA5</b>    | -0.215                      | 0.611  | 0.134  | 0.616  | 0.71   | 0.245  | 0.444  | -0.204 | 0.000082 |
| MAPK           | -0.431                      | -0.508 | -0.609 | -0.666 | -0.513 | -0.417 | -0.724 | -0.455 | 0.000082 |
| <b>HERC6</b>   | -0.181                      | 0.27   | 0.104  | 0.741  | 0.745  | 0.48   | 0.482  | 0.328  | 0.000165 |
| <b>HERC5</b>   | -0.407                      | -0.032 | -0.202 | 0.407  | 0.12   | -0.105 | -0.047 | -0.531 | 0.000329 |
| <b>RIG-I</b>   | -0.513                      | 0.363  | 0.253  | 0.43   | 0.534  | 0.001  | -0.009 | -0.453 | 0.000576 |
| <b>IFI44L</b>  | -0.44                       | 0.37   | 0.017  | 0.485  | 0.444  | 0.237  | 0.124  | -0.524 | 0.000576 |
| <b>OAS2</b>    | -0.513                      | -0.342 | -0.399 | 0.113  | 0.44   | -0.012 | 0.039  | 0.091  | 0.000576 |
| <b>RSAD2</b>   | -0.507                      | 0.306  | -0.223 | -0.103 | 0.237  | 0.158  | 0.032  | -0.439 | 0.000576 |
| <b>IRF7</b>    | -0.433                      | -0.216 | -0.159 | 0.46   | -0.234 | 0.318  | 0.128  | -0.244 | 0.000987 |
| <b>IFIT3</b>   | -0.51                       | -0.33  | -0.195 | 0.146  | -0.281 | -0.032 | -0.316 | -0.525 | 0.001563 |
| <b>OAS1</b>    | -0.54                       | -0.175 | -0.255 | 0.771  | 0.345  | -0.03  | 0.197  | -0.38  | 0.001563 |
| <b>OAS3</b>    | -0.576                      | -0.359 | -0.387 | -0.001 | 0.042  | -0.009 | -0.017 | -0.353 | 0.001563 |
| <b>IFI35</b>   | -0.58                       | -0.36  | -0.372 | 0.444  | -0.674 | 0.104  | -0.069 | -0.425 | 0.002468 |
| <b>IFI6</b>    | -0.494                      | 0.212  | -0.202 | 0.544  | -0.284 | 0.051  | -0.025 | -0.659 | 0.002468 |
| <b>IFI44</b>   | -0.46                       | 0.647  | 0.031  | 0.573  | 0.616  | -0.105 | 0.237  | -0.616 | 0.002468 |
| <b>MX1</b>     | -0.519                      | -0.61  | -0.412 | -0.006 | -0.196 | -0.218 | -0.159 | -0.327 | 0.002468 |
| <b>IFIT1</b>   | -0.487                      | 0.371  | -0.027 | 0.16   | -0.038 | -0.283 | 0.227  | -0.705 | 0.005512 |
| <b>XAF1</b>    | -0.62                       | -0.193 | -0.373 | -0.03  | 0.618  | 0.028  | 0.121  | -0.259 | 0.005512 |
| TLR3           | -0.032                      | 0.424  | 0.204  | 0.446  | 0.415  | 0.427  | 0.423  | 0.747  | 0.005512 |
| TBK1           | -0.067                      | 0.564  | 0.629  | 0.262  | 0.436  | 0.179  | 0.565  | -0.321 | 0.005512 |
| <b>ISG15</b>   | -0.41                       | 0.518  | -0.095 | 0.514  | -0.121 | -0.152 | 0.141  | -0.668 | 0.007898 |
| IKK $\beta$    | 0.02                        | 0.006  | 0.086  | 0.153  | 0.866  | 0.312  | 0.066  | 0.357  | 0.007898 |
| <b>IFIT2</b>   | -0.721                      | -0.38  | -0.567 | -0.414 | -0.598 | -0.451 | -0.328 | -0.555 | 0.01522  |
| MyD88          | -0.207                      | -0.383 | -0.387 | 0.048  | -0.065 | 0.187  | -0.61  | -0.277 | 0.046401 |
| <b>OASL</b>    | -0.67                       | -0.717 | -0.448 | 0.137  | -0.696 | -0.308 | -0.165 | -0.432 | 0.074455 |
| IRF3           | 0.591                       | -0.348 | 0.006  | 0.253  | -0.16  | 0.387  | 0.192  | 0.556  | 0.074455 |
| <b>IRF9</b>    | -0.525                      | -0.522 | -0.257 | 0.376  | -0.54  | -0.176 | -0.496 | -0.357 | 0.113945 |
| TNF- $\alpha$  | -0.426                      | -0.12  | 0.406  | -0.206 | -0.066 | -0.007 | 0.428  | -0.191 | 0.138791 |
| IL6            | 0.082                       | 0.101  | 0.569  | -0.028 | 0.044  | -0.097 | -0.311 | 0.311  | 0.138791 |
| IKK $\alpha$   | 0.224                       | 0.66   | 0.858  | 0.685  | 0.584  | 0.512  | 0.446  | -0.159 | 0.138791 |
| NF $\kappa$ B  | 0.119                       | -0.336 | -0.438 | -0.005 | 0.512  | 0.004  | -0.102 | 0.104  | 0.199589 |
| <b>IFI27</b>   | 0.148                       | -0.364 | -0.098 | -0.442 | -0.59  | -0.245 | -0.196 | -0.155 | 0.23587  |
| IFN- $\gamma$  | 0.404                       | 0.314  | -0.106 | 0.351  | -0.487 | -0.782 | 0.367  | -0.067 | 0.276594 |
| IFN- $\alpha$  | 0.013                       | -0.727 | 0.228  | -0.222 | -0.516 | -0.312 | 0.078  | 0.215  | 0.423447 |
| IKK $\epsilon$ | 0.803                       | 0.201  | 0.05   | 0.123  | 0.28   | -0.127 | 0.218  | 0.668  | 0.423447 |
| IFN- $\beta$   | 0.038                       | -0.306 | -0.352 | -0.368 | -0.627 | 0.023  | -0.033 | 0.021  | 0.480708 |

Note: The identified DNBs are marked in red and bold. Proteins with significant differences of correlations between the symptomatic and asymptomatic subjects are labeled in green background. The results indicate that most of the DNBs exhibit significant differences in the distributions of correlations between the two different clinical outcomes (marked in red and green background, P-value < 0.05).

**Table S30 Pearson correlation coefficient (PCC) between the expression values of S1PR1 and those proteins of interest in the innate immunity pathways in 12 symptomatic subjects infected by the H1N1 influenza virus strain**

|                | Symptomatic (Sx) subjects |        |        |        |        |        |        |        |        |        |        |        |
|----------------|---------------------------|--------|--------|--------|--------|--------|--------|--------|--------|--------|--------|--------|
|                | 2                         | 3      | 6      | 7      | 8      | 9      | 10     | 12     | 13     | 17     | 19     | 20     |
| <b>IRF7</b>    | -0.778                    | -0.338 | -0.727 | -0.787 | -0.656 | -0.44  | -0.5   | -0.779 | -0.788 | -0.555 | -0.906 | -0.833 |
| <b>RIG-I</b>   | -0.599                    | 0.6    | -0.667 | -0.874 | -0.567 | -0.371 | 0.116  | -0.863 | -0.848 | -0.429 | -0.931 | -0.837 |
| TLR3           | -0.342                    | 0.21   | -0.718 | -0.028 | -0.242 | 0.07   | 0.227  | -0.409 | -0.484 | 0.012  | -0.318 | -0.359 |
| <b>MDA5</b>    | -0.401                    | 0.825  | -0.661 | -0.856 | -0.55  | -0.328 | 0.713  | -0.831 | -0.809 | -0.392 | -0.939 | -0.809 |
| <b>IFI44</b>   | -0.501                    | 0.21   | -0.686 | -0.607 | -0.558 | -0.386 | 0.111  | -0.624 | -0.719 | -0.405 | -0.884 | -0.825 |
| <b>IFT1</b>    | -0.524                    | 0.267  | -0.699 | -0.779 | -0.626 | -0.384 | 0.082  | -0.759 | -0.72  | -0.279 | -0.869 | -0.803 |
| <b>IFI44L</b>  | -0.668                    | 0.137  | -0.682 | -0.608 | -0.578 | -0.376 | 0.221  | -0.574 | -0.701 | -0.444 | -0.875 | -0.826 |
| <b>IFIT3</b>   | -0.686                    | 0.049  | -0.712 | -0.762 | -0.611 | -0.373 | -0.228 | -0.71  | -0.748 | -0.445 | -0.902 | -0.824 |
| <b>RSAD2</b>   | -0.577                    | 0.044  | -0.699 | -0.663 | -0.566 | -0.386 | 0.007  | -0.663 | -0.743 | -0.421 | -0.896 | -0.828 |
| <b>IFI35</b>   | -0.769                    | -0.446 | -0.769 | -0.854 | -0.669 | -0.416 | -0.532 | -0.822 | -0.859 | -0.557 | -0.933 | -0.882 |
| <b>HERC5</b>   | -0.621                    | 0.185  | -0.703 | -0.829 | -0.6   | -0.371 | 0.237  | -0.813 | -0.786 | -0.429 | -0.909 | -0.827 |
| <b>MX1</b>     | -0.72                     | -0.013 | -0.706 | -0.784 | -0.615 | -0.395 | -0.141 | -0.716 | -0.777 | -0.453 | -0.892 | -0.819 |
| <b>HERC6</b>   | -0.683                    | 0.452  | -0.714 | -0.788 | -0.595 | -0.418 | 0.679  | -0.745 | -0.767 | -0.475 | -0.919 | -0.827 |
| <b>IFI6</b>    | -0.695                    | 0.145  | -0.699 | -0.675 | -0.571 | -0.345 | -0.296 | -0.538 | -0.79  | -0.475 | -0.895 | -0.821 |
| IKK $\beta$    | 0.271                     | -0.079 | -0.113 | 0.464  | 0.091  | 0.252  | 0.389  | 0.952  | 0.645  | 0.203  | 0.764  | 0.736  |
| IFN- $\beta$   | -0.309                    | -0.44  | -0.409 | -0.545 | -0.265 | 0.107  | -0.088 | -0.438 | 0      | -0.047 | -0.108 | -0.378 |
| <b>OAS1</b>    | -0.686                    | 0.271  | -0.691 | -0.679 | -0.573 | -0.358 | 0.316  | -0.692 | -0.762 | -0.456 | -0.893 | -0.837 |
| <b>OASL</b>    | -0.727                    | -0.183 | -0.723 | -0.842 | -0.659 | -0.411 | -0.41  | -0.798 | -0.817 | -0.469 | -0.926 | -0.854 |
| <b>ISG15</b>   | -0.726                    | -0.086 | -0.716 | -0.695 | -0.599 | -0.353 | -0.059 | -0.602 | -0.75  | -0.422 | -0.894 | -0.83  |
| TNF- $\alpha$  | -0.385                    | -0.404 | -0.505 | -0.05  | -0.104 | -0.043 | 0.014  | -0.815 | -0.275 | -0.515 | -0.801 | -0.552 |
| <b>OAS2</b>    | -0.687                    | 0.265  | -0.697 | -0.708 | -0.61  | -0.411 | 0.463  | -0.711 | -0.823 | -0.495 | -0.904 | -0.834 |
| TBK1           | 0.348                     | 0.336  | -0.168 | -0.518 | -0.131 | -0.112 | 0.363  | -0.85  | -0.684 | 0.045  | -0.794 | -0.582 |
| <b>IFIT2</b>   | -0.62                     | 0.03   | -0.719 | -0.826 | -0.632 | -0.431 | -0.262 | -0.853 | -0.849 | -0.399 | -0.902 | -0.816 |
| <b>OAS3</b>    | -0.663                    | 0.109  | -0.694 | -0.742 | -0.601 | -0.434 | 0.493  | -0.689 | -0.791 | -0.471 | -0.907 | -0.836 |
| <b>IRF9</b>    | -0.789                    | -0.123 | -0.693 | -0.706 | -0.682 | -0.418 | -0.367 | -0.641 | -0.794 | -0.367 | -0.82  | -0.815 |
| MAPK           | 0.071                     | -0.342 | 0.074  | 0.581  | -0.094 | 0.273  | -0.469 | -0.462 | -0.136 | 0.128  | 0.247  | 0.631  |
| IRF3           | -0.307                    | -0.716 | 0      | 0.555  | 0.163  | 0.366  | -0.023 | 0.818  | 0.507  | -0.047 | -0.031 | 0.355  |
| MyD88          | -0.581                    | 0.564  | -0.783 | -0.816 | -0.583 | -0.347 | 0.031  | -0.901 | -0.831 | -0.593 | -0.903 | -0.798 |
| <b>XAF1</b>    | -0.627                    | 0.075  | -0.669 | -0.702 | -0.572 | -0.363 | 0.399  | -0.616 | -0.72  | -0.508 | -0.906 | -0.826 |
| IKK $\alpha$   | 0.439                     | 0.857  | 0.645  | 0.432  | 0.373  | 0.059  | 0.126  | -0.552 | 0.183  | 0.429  | 0.327  | -0.09  |
| NF $\kappa$ B  | -0.352                    | -0.137 | -0.383 | -0.045 | -0.257 | 0.312  | 0.477  | -0.129 | 0.205  | -0.246 | 0.334  | 0.461  |
| IL6            | -0.446                    | 0.182  | 0.103  | 0.153  | 0.039  | 0.692  | 0.133  | -0.29  | -0.101 | 0.286  | 0.031  | -0.434 |
| IFN- $\gamma$  | 0.414                     | -0.144 | -0.256 | 0.098  | 0.149  | 0.34   | 0.122  | -0.551 | 0.047  | 0.449  | 0.211  | -0.108 |
| <b>IFI27</b>   | 0.495                     | -0.718 | -0.463 | 0.211  | -0.45  | -0.338 | -0.245 | -0.162 | -0.529 | -0.241 | -0.513 | -0.738 |
| IFN- $\alpha$  | -0.164                    | -0.003 | -0.328 | -0.053 | -0.45  | 0.001  | -0.194 | -0.618 | -0.206 | -0.134 | -0.228 | -0.002 |
| IKK $\epsilon$ | -0.384                    | -0.146 | -0.352 | -0.061 | -0.085 | 0.429  | 0.088  | 0.561  | 0.324  | -0.393 | -0.046 | 0.136  |

Note: The identified DNBs are marked in red and bold. Proteins with significant differences of correlations between the symptomatic and asymptomatic subjects are labeled in green background. The results indicate that most of the DNBs exhibit significant differences in the distributions of correlations between the two different clinical outcomes (marked in red and green background).

**Table S31 Pearson correlation coefficient (PCC) between the expression values of S1PR1 and those proteins of interest in the innate immunity pathways in 11 asymptomatic subjects infected by the H1N1 influenza virus strain.**

|                | Asymptomatic (Asx) subjects |        |        |        |        |        |        |        |        |        |        |         |
|----------------|-----------------------------|--------|--------|--------|--------|--------|--------|--------|--------|--------|--------|---------|
|                | 1                           | 4      | 5      | 11     | 14     | 15     | 16     | 18     | 21     | 22     | 23     | P-value |
| <b>IRF7</b>    | -0.451                      | -0.297 | -0.35  | -0.356 | -0.331 | -0.787 | -0.232 | -0.617 | -0.323 | -0.304 | -0.232 | 0.003   |
| <b>RIG-I</b>   | 0.689                       | 0.169  | -0.264 | 0.467  | 0.313  | -0.821 | -0.067 | -0.565 | 0.103  | -0.22  | 0.8    | 0.007   |
| TLR3           | -0.209                      | 0.152  | 0.186  | 0.469  | 0.085  | -0.147 | 0.019  | 0.093  | 0.098  | 0.441  | 0.288  | 0.009   |
| <b>MDA5</b>    | 0.838                       | 0.503  | -0.271 | 0.599  | 0.456  | -0.765 | -0.292 | -0.362 | 0.243  | -0.064 | 0.91   | 0.011   |
| <b>IFI44</b>   | 0.298                       | 0.133  | -0.211 | -0.205 | 0.308  | -0.688 | -0.283 | -0.391 | -0.009 | 0.037  | -0.104 | 0.013   |
| <b>IFIT1</b>   | 0.426                       | 0.252  | -0.297 | 0.086  | 0.251  | -0.711 | -0.142 | -0.394 | -0.276 | -0.232 | -0.107 | 0.013   |
| <b>IFI44L</b>  | 0.11                        | 0.173  | -0.311 | -0.124 | 0.603  | -0.695 | -0.011 | -0.511 | 0.327  | -0.16  | -0.067 | 0.015   |
| <b>IFIT3</b>   | 0.117                       | 0.159  | -0.354 | -0.648 | 0.088  | -0.785 | -0.116 | -0.509 | -0.356 | -0.17  | -0.043 | 0.015   |
| <b>RSAD2</b>   | 0.052                       | -0.02  | -0.266 | -0.466 | 0.325  | -0.749 | -0.145 | -0.496 | 0.249  | -0.12  | 0.454  | 0.015   |
| <b>IFI35</b>   | -0.53                       | -0.323 | -0.402 | -0.686 | -0.656 | -0.839 | -0.261 | -0.641 | -0.247 | -0.616 | 0.279  | 0.018   |
| <b>HERC5</b>   | 0.232                       | 0.14   | -0.337 | -0.258 | 0.454  | -0.777 | -0.195 | -0.542 | -0.182 | -0.485 | -0.093 | 0.021   |
| <b>MX1</b>     | 0.067                       | -0.049 | -0.393 | -0.573 | 0.126  | -0.771 | -0.328 | -0.676 | -0.172 | -0.595 | 0.104  | 0.021   |
| <b>HERC6</b>   | 0.581                       | 0.015  | -0.258 | 0.228  | -0.452 | -0.783 | 0.179  | -0.473 | -0.024 | -0.299 | 0.479  | 0.025   |
| <b>IFI6</b>    | 0.155                       | 0.116  | -0.437 | -0.347 | -0.501 | -0.769 | -0.279 | -0.414 | -0.094 | -0.285 | -0.445 | 0.025   |
| IKK $\beta$    | 0.44                        | 0.258  | -0.474 | -0.155 | -0.007 | 0.816  | -0.587 | -0.263 | -0.188 | -0.185 | 0.229  | 0.025   |
| IFN- $\beta$   | -0.131                      | 0.179  | 0.446  | 0.036  | -0.378 | 0.12   | -0.074 | 0.246  | -0.257 | 0.136  | -0.392 | 0.029   |
| <b>OAS1</b>    | 0.588                       | 0.469  | -0.221 | -0.316 | -0.045 | -0.724 | -0.489 | -0.599 | -0.202 | -0.411 | 0.261  | 0.034   |
| <b>OASL</b>    | -0.306                      | -0.083 | -0.417 | -0.544 | -0.139 | -0.819 | -0.276 | -0.679 | -0.606 | -0.556 | 0.156  | 0.034   |
| <b>ISG15</b>   | -0.462                      | -0.136 | -0.324 | -0.402 | -0.457 | -0.765 | 0.157  | -0.574 | 0.466  | -0.414 | 0.202  | 0.039   |
| TNF- $\alpha$  | -0.278                      | 0.554  | 0.021  | 0.467  | -0.109 | -0.587 | -0.005 | -0.146 | 0.459  | 0.11   | -0.519 | 0.045   |
| <b>OAS2</b>    | 0.381                       | -0.129 | -0.233 | -0.543 | 0.259  | -0.749 | -0.379 | -0.698 | -0.262 | -0.495 | 0.51   | 0.053   |
| TBK1           | 0.208                       | 0.394  | -0.101 | 0.669  | 0.524  | -0.438 | -0.311 | 0.129  | -0.034 | 0.318  | -0.087 | 0.06    |
| <b>IFIT2</b>   | 0.052                       | -0.09  | -0.303 | -0.827 | 0.237  | -0.833 | -0.631 | -0.693 | -0.273 | -0.217 | -0.029 | 0.069   |
| <b>OAS3</b>    | 0.228                       | -0.16  | -0.307 | -0.573 | 0.224  | -0.794 | -0.566 | -0.673 | -0.431 | -0.448 | 0.171  | 0.069   |
| <b>IRF9</b>    | -0.315                      | -0.251 | -0.599 | -0.664 | -0.059 | -0.759 | -0.361 | -0.665 | -0.444 | -0.718 | 0.083  | 0.079   |
| MAPK           | 0.007                       | -0.378 | -0.231 | -0.791 | 0.084  | -0.212 | -0.661 | -0.565 | -0.438 | -0.08  | 0.343  | 0.079   |
| IRF3           | 0.006                       | -0.41  | -0.284 | -0.729 | -0.633 | 0.64   | 0.318  | -0.17  | 0.001  | -0.671 | -0.224 | 0.103   |
| MyD88          | 0.258                       | 0.007  | -0.42  | -0.381 | -0.28  | -0.889 | -0.696 | -0.679 | -0.409 | -0.296 | 0.238  | 0.103   |
| <b>XAF1</b>    | 0.083                       | 0.286  | -0.187 | -0.816 | 0.269  | -0.733 | -0.67  | -0.66  | 0.109  | 0.123  | 0.607  | 0.148   |
| IKK $\alpha$   | 0.759                       | 0.549  | 0.313  | 0.775  | 0.542  | 0.164  | -0.004 | 0.444  | 0.192  | 0.567  | 0.605  | 0.186   |
| NF $\kappa$ B  | -0.12                       | -0.213 | -0.242 | -0.646 | -0.065 | -0.103 | -0.303 | -0.558 | -0.123 | -0.529 | 0.503  | 0.23    |
| IL6            | 0.145                       | 0.091  | 0.267  | 0.01   | 0.107  | 0.431  | 0.417  | 0.244  | 0.413  | -0.602 | -0.33  | 0.406   |
| IFN- $\gamma$  | -0.113                      | 0.091  | 0.259  | -0.159 | -0.256 | -0.009 | -0.202 | 0.467  | -0.343 | 0.322  | 0.068  | 0.479   |
| <b>IFI27</b>   | -0.007                      | -0.342 | -0.377 | -0.943 | -0.401 | -0.571 | 0.298  | -0.302 | 0.012  | 0.148  | -0.182 | 0.518   |
| IFN- $\alpha$  | -0.306                      | -0.753 | 0.099  | -0.365 | 0.015  | 0.137  | -0.044 | -0.054 | 0.036  | -0.3   | -0.548 | 0.644   |
| IKK $\epsilon$ | -0.383                      | -0.015 | 0.222  | 0.114  | -0.303 | -0.536 | 0.48   | -0.221 | -0.02  | -0.556 | 0.358  | 0.735   |

Note: The identified DNBs are marked in red and bold. Proteins with significant differences of correlations between the symptomatic and asymptomatic subjects are labeled in green background. The results indicate that most of the DNBs exhibit significant differences in the distributions of correlations between the two different clinical outcomes (marked in red and green background, P-value < 0.05).

## Supplementary MATLAB source codes

\*\*\*\*\*

**Remark: We list two important M files for constructing the dynamic networks.** The detailed MATLAB source codes are available at: <http://maths.whu.edu.cn/teach/lj/?title=xfzou>, or, <http://maths.whu.edu.cn/d/file/shizililiang/lj/2015-01-26/a35859758c8cc953516fb2edfe73f732.pdf>. If the readers are interested in all the source data and codes in this paper, they can contact with Prof. Xiufen Zou: [xfzou@whu.edu.cn](mailto:xfzou@whu.edu.cn). We can provide all the executable M files.

\*\*\*\*\*

### Function LP\_OP.m

% Function LP\_OP.m: the optimization problem is transformed into a standard linear programming

% (LP) problem.

function [J,f1]=LP\_OP(Y,X,lamda1,lamda2,beta)

%Y is the expression value of target gene

%X is the expression values of genes interact with target gene

%lamda1 is the regularization parameter for guarantee the sparseness

%lamda2 is the regularization parameter for guarantee the continuity

%beta is a priori information about interactions

%J is the strength of interaction relations

%f1 is the optimization of objective function values

[n,m]=size(Y);%Y is a row vector, n=1,m is the number of samples

[p,q]=size(X);%X is a matrix, p is the number of genes, q is the number of samples

c=n\*m;

h=n\*p;

f=[ones(1,2\*c),lamda1\*ones(1,2\*h),lamda2\*ones(1,2\*h)];

%f is a column vector, the first 2c lines are u, v coefficient, after 2h lines

%are ksai, yeta coefficient

A1=sparse(1:c,1:c,ones(1,c),c,c);

A2=sparse(1:c,1:c,-ones(1,c),c,c);

Z=X';%a line is a sample, a column is a gene

Z\_1=1/2\*Z;

Y\_1=Y';%Y\_1 is a column vector

beq=Y\_1-Z\_1\*beta;

beq=[beq;beta];

Z\_2=-Z\_1;

Aeq1=full([A1,A2,Z\_1,Z\_2,Z\_1,Z\_2]);

B=zeros(p,c);

B\_1=sparse(1:p,1:p,ones(1,p),p,p);

B\_2=sparse(1:p,1:p,-ones(1,p),p,p);

Aeq2=[B,B,full(B\_1),full(B\_2),full(B\_2),full(B\_1)];

Aeq=[Aeq1;Aeq2];

Aeq=sparse(Aeq);

clear A1 A2 Z\_1 Z\_2 Z\_1 Y\_1;

lb=zeros(2\*(c+h+h),1);

[x,f1]=linprog(f,[],[],Aeq,beq,lb);

```

x=x';
s=sparse(n,p);
t=sparse(n,p);
s1=sparse(n,p);
t1=sparse(n,p);
J=sparse(n,p);
J1=sparse(n,p);
    for k=1:p
        s(1,k)=x(2*m+k);
        t(1,k)=x(2*m+p+k);
        s1(1,k)=x(2*m+2*p+k);
        t1(1,k)=x(2*m+3*p+k);
    end
J=s-t;
J=full(J);
end

```

### Function ODE.m

```

% Function ode_net.m: Inferring dynamic strength matrices of control(asymptomatic) and
%case(symptomatic) samples
function [As_ode_net,S_ode_net]=ode_net(lamda1,lamda2,nt,na,ns)
    %lamda1 is the regularization parameter for guarantee the sparseness
    %lamda2 is the regularization parameter for guarantee the continuity
    %nt is the number of time points
    %na is the number of control(asymptomatic) samples
    %ns is the number of case(symptomatic) samples
    %As_ode_net is a cell array of strength matrices of control(asymptomatic)
    %S_ode_net is a cell array of strength matrices of case(symptomatic)
    load As_cen_diff.mat;%gene second-order central difference expression of control(asymptomatic)
    load S_cen_diff.mat;%gene second-order central difference expression of case(symptomatic)
    load As_adj.mat;%the simplified control(asymptomatic) network based on MI
    load S_adj.mat;%the simplified case(symptomatic) network based on MI
    load data_GC.mat;%sequence of gene expression data
    [m,~]=size(data_GC);
    % construction asymptomatic(control) dynamic network
    As_ode_net{1}=As_adj{1};
    for t=1:nt-1
        As_ode_net{t+1}=zeros(m,m);
        A=As_adj{t};
        X=[];
        for i=1:m
            for s=1:na
                Y(i,s)=As_cen_diff{s}(i,t);
            end
            k=0;
            for j=1:m
                if A(i,j)==1

```

```

        k=k+1;
        X(k,:)=data_CG(j,1+t:nt:na*nt);
        beta(k,1)=As_ode_net{t}(i,j);
    end
end
if k~=0
    [J,f1]=LP_OP(Y(i,:),X,lamda1,lamda2,beta);
    k=0;
    for j=1:m
        if A(i,j)==1
            k=k+1;
            As_ode_net{t+1}(i,j)=J(k);
        end
    end
    X=[];
    beta=[];
end
end
end
save As_ode_net.mat As_ode_net;
%% construction symptomatic(case) dynamic network
S_ode_net{1}=S_adj{1};
for t=1:nt-1
    S_ode_net{t+1}=zeros(m,m);
    A=S_adj{t};
    X=[];
    for i=1:m
        for s=1:ns
            Y(i,s)=S_cen_diff{s}(i,t);
        end
    end
    k=0;
    for j=1:m
        if A(i,j)==1
            k=k+1;
            X(k,:)=data_CG(j,na*nt+1+t:nt:(ns+na)*nt);
            beta(k,1)=S_ode_net{t}(i,j);
        end
    end
end
if k~=0
    [J,f1]=LP_OP(Y(i,:),X,lamda1,lamda2,beta);
    k=0;
    for j=1:m
        if A(i,j)==1
            k=k+1;
            S_ode_net{t+1}(i,j)=J(k);
        end
    end
end
end
end

```

```
X=[];  
beta=[];  
end  
end  
end  
save S_ode_net.mat S_ode_net;
```
